# Supplementary material for: Successful Fecal Microbiota Transplants in Post-antibiotic Treated Recurrent Clostridioides difficile Patients Induce Acylcarnitine and Sphingolipid Lipidomic Shifts
Source: Research Square preprint supplement (doi:10.21203/rs.3.rs-7888346/v1), 2025-11-03
Supplement: Supplementary file 1 [file 7f4225a9cd17f52352b1cbaa.xlsx]

## Sheet: Table S1
Table S1: Sample Metadata
sample_ID	Recipient	PatientID	time	prepost	recurrent_cdi	sex	consent_age	bmi
R1_1	R1	1473	Pre	Pre	0	Female	26.5	26.6
R2_1	R2	1723	Pre	Pre	0	Female	93.7	29.4
R3_1	R3	1810	Pre	Pre	0	Male	62.2	30.3
R4_1	R4	1075	Pre	Pre	0	Female	64.1	23.3
R5_1	R5	1922	Pre	Pre	0	Male	52.6	29.4
R6_1	R6	1040	Pre	Pre	0	Male	57.2	26.1
R7_1	R7	1641	Pre	Pre	0	Female	72	22.1
R8_1	R8	1780	Pre	Pre	0	Female	71.2	22.2
R9_1	R9	1847	Pre	Pre	1	Female	62.6	28.4
R9_1B	R9	1847	Pre	Pre	1	Female	62.6	28.4
R10_1	R10	1080	Pre	Pre	0	Female	74	27.4
R11_1	R11	1949	Pre	Pre	0	Female	46.8	24.2
R12_1	R12	1332	Pre	Pre	0	Female	57.2	30.1
R13_1	R13	1701	Pre	Pre	0	Male	64	20.6
R14_1	R14	1130	Pre	Pre	0	Female	55.6	17.8
R15_1	R15	1896	Pre	Pre	0	Male	58.1	24.2
R1_2	R1	1473	2 week	Post	0	Female	26.5	26.6
R2_2	R2	1723	2 week	Post	0	Female	93.7	29.4
R3_2	R3	1810	2 week	Post	0	Male	62.2	30.3
R4_2	R4	1075	2 week	Post	0	Female	64.1	23.3
R6_2	R6	1040	2 week	Post	0	Male	57.2	26.1
R7_2	R7	1641	2 week	Post	0	Female	72	22.1
R8_2	R8	1780	2 week	Post	0	Female	71.2	22.2
R9_2	R9	1847	2 week	Post	1	Female	62.6	28.4
R12_2	R12	1332	2 week	Post	0	Female	57.2	30.1
R13_2	R13	1701	2 week	Post	0	Male	64	20.6
R14_2	R14	1130	2 week	Post	0	Female	55.6	17.8
R3_3	R3	1810	2 month	Post	0	Male	62.2	30.3
R4_3	R4	1075	2 month	Post	0	Female	64.1	23.3
R6_3	R6	1040	2 month	Post	0	Male	57.2	26.1
R7_3	R7	1641	2 month	Post	0	Female	72	22.1
R8_3	R8	1780	2 month	Post	0	Female	71.2	22.2
R9_3	R9	1847	2 month	Post	1	Female	62.6	28.4
R10_3	R10	1080	2 month	Post	0	Female	74	27.4
R12_3	R12	1332	2 month	Post	0	Female	57.2	30.1
R13_3	R13	1701	2 month	Post	0	Male	64	20.6
R14_3	R14	1130	2 month	Post	0	Female	55.6	17.8
R1_4	R1	1473	6 month	Post	0	Female	26.5	26.6
R2_4	R2	1723	6 month	Post	0	Female	93.7	29.4
R4_4	R4	1075	6 month	Post	0	Female	64.1	23.3
R5_4	R5	1922	6 month	Post	0	Male	52.6	29.4
R7_4	R7	1641	6 month	Post	0	Female	72	22.1
R8_4	R8	1780	6 month	Post	0	Female	71.2	22.2
R9_4	R9	1847	6 month	Post	1	Female	62.6	28.4
R10_4	R10	1080	6 month	Post	0	Female	74	27.4

## Sheet: Table S2
Table S2: Sample Weight for Lipidomic Analysis
Rank	Label	Net Weight (mg)
1	R1-1 A	57.2
2	R1-2 Ph	43.9
3	R1-4 Ph	58
4	R2-1	65.8
5	R2-2 Ph	24.2
6	R2-4 Ph	38.4
7	R3-1 A	38
8	R3-2 Ph	37.1
9	R3-3 Ph	48.9
10	R4-1 Ph	32.3
11	R4-2 Ph	39.3
12	R4-3 Ph	39.7
13	R4-4 Ph	42.7
14	R5-1 P	44.4
15	R5-4 P	47.1
16	R6-1	48.2
17	R6-2 Ph	57
18	R6-3 Ph	39.6
19	R7-1 Ph	66.9
20	R7-2 Ph	41.7
21	R7-3 Ph	56.6
22	R7-4 Ph	48.7
23	R8-1 Ph	43.7
24	R8-2 Ph	55.4
25	R8-3 Ph	72.9
26	R8-4 Ph	56.3
27	R9-1 Ph	42.7
28	R9-1B Ph	54.5
29	R9-2 Ph	41.3
30	R9-3 Ph	78.8
31	R9-4 Ph	71.1
32	R10-1 Ph	39.9
33	R10-3 Ph	57.1
34	R10-4 Ph	54.5
35	R11-1 Ph	67.9
36	R12-1 A	70.7
37	R12-2 Ph	68
38	R12-3 P	72.1
39	R13-1 Ph	69.7
40	R13-2 Ph	42.8
41	R13-3 Ph	62.3
42	R14-1 Ph	46.8
43	R14-2 ph	70.9
44	R14-3	74.3
45	R15-1	63.4

## Sheet: Table S3
Table S3: LC Method
Time (min)	%A	%B	Flow Rate (mL/min)
0	60	40	0.25
2	50	50	0.25
3	40	60	0.25
12	30	70	0.25
15	25	75	0.25
17	22	78	0.25
19	15	85	0.25
22	8	92	0.25
25	1	99	0.25
34	1	99	0.25
34.5	60	40	0.3
35	1	99	0.3
35.5	1	99	0.3
36	60	40	0.35
37	60	40	0.3
38	60	40	0.25

## Sheet: Table S4
Table S4: MS Method
Parameter	Value
Gas Temp (degC)	300
Drying Gas (L/mim)	5
Nebulizer(psi)	35
Sheath Gas Temp(degC)	350
Sheath Ga(L/mim)s Flow	11
Vcap(V)	3500
Nozzle Voltage(V)	1000
Trap Fill Time(us)	10000
Trap Release Time(us)	400

## Sheet: Table S5
Table S5: Collision Energy
Drift Time (ms)	CollisionEnergy (V)
0	0
15	14
19	27
25	45
40	52
50	58

## Sheet: Table S6
Table S6: Weight and TIC Normalized Lipid Values
Sample	R1_1	R1_2	R1_4	R2_1	R2_2	R2_4	R3_1	R3_2	R3_3	R4_1	R4_2	R4_3	R4_4	R5_1	R5_4	R6_1	R6_2	R6_3	R7_1	R7_2	R7_3	R7_4	R8_1	R8_2	R8_3	R8_4	R9_1	R9_1B	R9_2	R9_3	R9_4	R10_1	R10_3	R10_4	R11_1	R12_1	R12_2	R12_3	R13_1	R13_2	R13_3	R14_1	R14_2	R14_3	R15_1	53Pos Area	54Pos Area	55Pos Area
AC(10:0)	0.0017535	0	0	3.84e-05	0	0	0	4.94e-05	0.000113536	0	0	0	0	0.000150971	0	0.000571631	0	0	0.000292905	0	0	0	0.000487746	0	0	0	0.000266845	0	0	0	0	0.000210083	0	0	0.000468347	0.00016474	0	0	0.000183784	0	0	0	0	0	4.6e-05	0	0	0
AC(12:0)a	0.000869811	2.84e-07	0	0.00232682	0	0	0.000940769	0.000692954	0.00177048	0.000202849	0	0	0	0.000800358	0.000100911	0.000723783	0	2.93e-08	0.000928264	0	0	0	0.00118443	0	0	0	0.000253125	0	0	0	0	0	0	0	0.00123719	0.00283269	0	0	0.000570161	0	0	0.000531826	0	0	0.00216838	0	0	0
AC(12:0)b	0.00362908	0	0	0.000740509	0	0	0.000815237	0.00152585	0.00306313	0.000288939	0	0	0	0.0010068	8.38e-05	0.00519406	0	0.000235833	0.00244172	0	0	0	0.00216654	0	0	0	0.00137009	0	0	0	0	0.0041453	0	0	0.00328794	0.0035025	0	0	0.00166468	0	0	0.000238408	2.88e-05	0	0.00603447	0	0	0
AC(12:1)	0.00564182	9.34e-06	0	0.00187654	0	0	0.00127833	0.000512859	0.00126431	0.000464749	0	0	0	0.00176683	0.0001867	0.00560308	0	8.23e-05	0.00170465	0	0	0	0.0073379	0	0	0	0.00190989	0	0.000215123	0	0	0.00191045	0	0	0.00100977	0.00481441	0	0	0.000657639	0	0	0.000773781	0	0	0.0008054	7.54e-07	0	0
AC(14:0)a	0.00212484	8.82e-06	0	0.00246909	0	0	0.0020374	0.00179747	0.00330808	0.000822028	5.58e-05	3.71e-05	1.83e-05	0.00061132	0.000271287	0.000706894	5.44e-06	0.000418195	0.00112446	3.09e-05	0	8.64e-05	0.00105139	0	2.34e-05	3.77e-05	6.71e-05	0.000248781	6.7e-05	4.44e-05	0	0.000747738	7.71e-06	0	0.00123822	0.00179149	5.74e-05	4.8e-06	0.000264867	2.13e-05	2.04e-06	0.000714729	3.53e-05	3.69e-05	0.00101154	0	0	0
AC(14:0)b	0.00399845	0.000364357	6.38e-05	0.00268141	0	0	0.00455935	0.0039351	0.00658623	0.00013498	5.98e-05	0	0	0.0037956	0.00242003	0.0131668	6.76e-05	0.00422651	0.00764541	0.00169375	0	0.000453397	0.00280996	5.16e-05	0.00013894	0.000466224	0.000721739	0.000414425	0.000801727	0.000317835	3.58397e-05	0.0134241	0.000148115	0.000135515	0.0198736	0.0166048	0.00160088	0.000108976	0.0123927	0.00183576	0	0.00114818	0.000789828	0.000757298	0.0220265	0	0	0
AC(14:1)	0.00101405	0	0	0.000255375	0	0	0.000447995	0.000352168	0.0011933	0.000149357	5.9e-05	3.94e-05	0	0.000191538	5.98e-05	0.0004692	0	0.000108095	0.000799816	0	0	2.5e-05	0.000863525	0	0	0	0.000531625	4.93e-05	0	0	0	0.000605062	0	0	0.00294708	0.00109494	0	0	0.000164081	0	0	0.000102509	1.83e-05	0	0.0006838	0	0	0
AC(14:2)	0.00157825	0	0	0.000542328	0	0	0	0	0.000238161	0	0	0	0	0.000307405	0.000106626	0.00151994	0	0	0.000206752	0	0	0	0.000771608	0	0	0	0.000306584	0	0	0	0	0.000940735	0	0	0.000459728	0.00122647	0	0	0.00149944	0	0	0	0	0	0.000225555	0	0	0
AC(16:0)	0.0124634	0.00151634	0.00172842	0.0129161	0.000129599	0.000120978	0.0243035	0.0441328	0.0570652	0.00523136	0.00106863	0.00101873	0.00038459	0.0235641	0.0346838	0.0379703	0.00367255	0.032476	0.00997311	0.0199297	0.000209961	0.00555759	0.0336613	0.000574264	0.00616336	0.0011476	0.00304493	0.00143301	0.0133425	0.00268962	0.000133355	0.0174419	0.000649536	0.000525114	0.0340266	0.0520201	0.0293896	0.0159718	0.0209908	0.020417	0.000204122	0.0251787	0.0113298	0.00892165	0.0588318	0	0	0
AC(18:0)	0.0095024	0.00724061	0.00720839	0.0076407	0.00294708	0.00135344	0.020817	0.0236099	0.0365503	0.00220781	0.00330524	0.00389586	0.00331046	0.00953423	0.0259059	0.0117632	0.0170335	0.0301937	0.00973764	0.012109	0.000316221	0.0108017	0.0189554	0.00250648	0.00788368	0.00102945	0.00817727	0.00382186	0.0290224	0.00633217	0.000606393	0.00891761	0.000533806	0.00629602	0.0120566	0.0383779	0.0132373	0.0215883	0.00589225	0.00765136	0.0125187	0.00616461	0.0116851	0.00628544	0.0375581	0	0	0
AC(18:1)a	0.00262639	0.00108888	0.00121833	0.00586576	0	0	0.00540583	0.0129068	0.0228983	0.00237095	0.00125476	0.00210052	0.000903849	0.0101439	0.0102506	0.0152267	0.00166845	0.0137346	0.00365168	0.00524697	0.000418151	0.00292959	0.0044887	0	0.00170099	0	0.00304563	0.000839356	0.00459165	0.0019931	0.000185402	0.00479669	0.000332765	0.000297681	0.00676562	0.0167902	0.0131873	0.00380302	0.0177765	0.0195474	0	0.00430564	0.00575903	0.00488575	0.0240019	0	0	0
AC(18:1)b	0.000984736	0	0	0	0.00058027	0	0.000676235	0.000793764	0.00068584	0.00012701	0	0	0.0001355	0.000215584	0.00183043	0.00110555	0	0.000693022	0.0004255	0.00129033	8.59e-05	0.000508154	0.000783386	0.000121781	0.000148763	0	0	0.000327313	0.000808263	0.000522039	0	0.000702363	0	0	0.00120768	0.0012913	0.00263178	0.00156306	0	0.000358815	0	0.000283465	0.000167628	0.000394663	0.00190783	0	0	0
AC(18:2)	0.000733091	0	0.000435742	0.00190263	0	0	0.00237822	0.00389659	0.00917142	0.00103638	0.000747106	0.00287378	0	0.00538652	0.0028603	0.00722471	0	0.00576783	0.000853865	0	0	0.000468962	0.00662824	0	0.000247816	0	0.00161837	0	0.000792383	0.000595172	0	0.00356199	0	0	0.00152916	0.0155768	0.00243658	0	0.0142368	0.00836403	0	0.0075263	0.00194461	0.000400557	0.0108739	0	0	0
AC(24:0)	0.00107498	0.00334203	0.00287099	0.00142007	0.00168861	0.0026951	0.00631266	0.00756912	0.00884638	0.000570775	0.000526993	0.000304165	0.000742091	0.000575326	0.00166459	0.000533131	0.00203137	0.00155821	0.00130205	0.00113644	0.000479986	0.000645182	0.00288072	0.0088199	0.00500302	0.00475095	0.00157473	0.00199709	0.00204147	0.00114411	0.0018849	0.00105225	0.00246268	0.00176625	0.00174238	0.00118527	0.00195072	0.00271514	0.000450887	0.000186239	0.00238768	0.00055634	0.00025131	0.00130265	0.000713264	0	0	0
AC(26:0)	0.00103907	0.00168124	0.000942332	0.00172994	0.00117881	0.00125958	0.00137765	0.00447606	0.00395297	0.000574124	0.000819756	0.000542753	0.000636112	0.000276305	0.00102535	0.000316297	0.00120915	0.00102454	0.000777648	0.000734429	0.000324338	0.000487573	0.000864842	0.00266808	0.00179327	0.00235114	0.000416131	0.000999655	0.000514089	0.000726479	0.000868836	0.0011347	0.00294443	0.00184771	0.000749655	0.000254857	0.00276822	0.00198405	0.000249288	0.000105343	0.000698617	0.000326559	0.000344477	0.00100686	0.000457004	0	0	0
CE(18:1)	0	1.99e-05	0	1.52e-05	0	0	2.87e-05	0.000323861	0.000481751	2.11e-05	5.14e-07	0	0	0.000194807	4.5e-05	0.000125753	5.37e-05	0	3.39e-05	0.00014151	0	1.88e-05	0	7.83e-05	8.84e-06	4.16e-05	2.51e-05	0	0	2.3e-05	0	6.38e-05	0.00023477	0	3.14e-05	1.17e-05	5.83e-05	0	6.78e-05	0.000669773	0	2.12e-05	0.000101701	1.58e-05	0	0	0	0
CE(18:2)	5.08e-05	2.18e-05	0	2.15e-05	0	6.46e-05	0	0.00110809	0.00094066	3.94e-05	8.66e-06	1.73e-05	3.17e-05	0.000257269	0.000220202	0.000482583	8.36e-05	3.8e-05	0.000160023	5.05e-05	0	3.98e-05	2.66e-05	0.000332728	1.21e-05	0.000171883	0	0.00166989	8.59e-05	0.000124209	1.26878e-05	0.000201932	0.000892854	6.79e-05	3.29e-05	0.000135255	0.000234621	4.43e-05	0.000545313	0.00150446	2.4e-05	0.000155759	0.000456765	7.15e-05	0	0	0	0
CE(20:3)	9.6e-05	1.77e-05	1.22e-05	2.56e-05	0.000116357	0.000156888	2.1e-05	0.000272182	0.000357691	4.32e-05	0.000168628	0.000464823	0.000588501	0.00062769	0.000701414	0.00495321	8.01e-05	8.8e-05	0.000103347	6.77e-05	0	0.000151051	7.94e-05	8.86e-05	1.3e-05	0.000133134	7.39e-05	0.000766096	0.00011255	0.000218557	2.09283e-05	0.000347301	0.000436902	9.2e-05	6.67e-05	2.53e-05	0.000191214	0.00012411	3.28e-05	0.000243629	2.48e-05	0.000217433	0.000422001	3.98e-05	0	0	0	0
CE(22:6)	2.4e-05	0	0	0	0.00123092	0.00113377	0	0.000183249	0.00040974	8.48e-05	0	0	0	0.00852582	0.000179817	0.00067254	0.000109273	1.32e-05	0.00050089	0.000164291	0	0	0	2.36e-05	0	0.000306077	0	0.00143409	7.8e-05	0.000210078	0	0.000667762	0.000376198	0	0	0.00012524	0.000588142	0.000179982	0.000398046	0	0	0	8.88e-05	0	0	0	0	0
Cer(d16:1/23:0)a	1.59e-06	9.55e-06	2.59e-06	3.36e-06	3.46074e-05	1.04e-06	4.61e-06	1.32e-05	7.36e-06	1.63e-05	7.03e-06	2.39e-05	1.41e-05	6.06e-06	5.89e-06	0.00011828	0.000122392	1.96e-05	2.47e-05	7.9e-05	3.67e-05	1.26e-05	8.95e-06	5.97e-05	7.47e-06	6.04e-05	5.02e-06	1.58e-05	1.95e-06	1.34e-06	2.75992e-06	0.000132462	6.78e-05	1.28e-05	1.35e-05	8.06e-06	4.17e-07	3.1e-05	2.73e-05	3.88e-06	0.000219085	1.29e-05	9.2e-06	5.65e-05	2.6e-05	7.74e-06	5.51e-06	1.57e-05
Cer(d16:1/23:0)b	0.00186361	0.00250807	0.000105481	0.000791317	0.0020059	0.00165555	0.00376759	0.00597943	0.00642899	0.00205007	0.000245321	0.0010464	0.00113478	0.0019774	0.00415	0.011328	0.00317837	0.00498322	0.00438037	0.00126377	0.00422329	0.00153865	0.000885907	0.000223043	0.000620389	1.91e-05	0.00110974	0.00315604	0.005206	0.00270112	0.000420739	0.00760569	0.000633682	0.0005183	0.000763233	0.00105001	0.00124668	0.000296321	0.00224572	0.0032616	0.000895338	0.00327766	0.00452357	0.00625864	0.000771294	8.68e-06	7.28e-06	9.86e-06
Cer(d16:1/24:0);Cer(d18:1/22:0)	0.0137075	0.0178779	0.00181155	0.0105271	0.00889085	0.00690082	0.0252128	0.0346369	0.0298872	0.0447127	0.0147772	0.00629286	0.00564573	0.0244175	0.0233164	0.0333855	0.0139092	0.0316159	0.0264126	0.00988575	0.0116057	0.0172686	0.0116492	0.00228982	0.00440014	0.000723147	0.00738393	0.0194603	0.0198857	0.00924471	0.0014464	0.0220366	0.00522486	0.00360634	0.00451056	0.00818393	0.0113344	0.00104355	0.0181867	0.0268061	0.00668097	0.0255477	0.0162458	0.0170426	0.00579458	9.94e-06	1.85e-05	1.44e-05
Cer(d16:1/24:1);Cer(d18:2/22:0)	0.00216979	0.00286163	0.000168728	0.00421076	0.00210695	0.00134767	0.00442518	0.0102202	0.00588252	0.00679191	0.000897116	0.000493763	0.00146599	0.00278209	0.00489058	0.00578195	0.00469783	0.00582667	0.00472126	0.0034825	0.000944366	0.00402065	0.00147014	0.000167443	0.000426038	0.0001358	0.00242266	0.00614764	0.0038659	0.0022187	0.000272198	0.00310345	0.000908508	0.000330772	0.000569779	0.00154346	0.00152113	9.12e-05	0.00846874	0.00456265	0.000969605	0.00362191	0.00207679	0.00827594	0.000314619	2.57e-06	8.17e-07	0
Cer(d18:0/22:0)	0.00108081	0.00134237	0.000173209	0.000915667	0.000687237	0.000574112	0.00252058	0.00373672	0.00274676	0.00482298	0.00119879	0.000595666	0.000445419	0.00204906	0.00117767	0.00354887	0.000964317	0.00332058	0.00323346	0.000914881	0.000947606	0.00153909	0.0010644	0.000515538	0.000473703	9.76e-05	0.000604813	0.00211971	0.00181892	0.000654447	0.000161046	0.00230116	0.000416403	0.000263317	0.000408305	0.000751869	0.000946656	0.000121286	0.00179506	0.00249782	0.000556196	0.00224	0.00188075	0.00206383	0.000418535	3.96e-07	3.6e-06	2.29e-06
Cer(d18:1/16:0)	0.0246331	0.0283714	0.00462922	0.0289744	0.032366	0.0131381	0.0518524	0.0802236	0.056238	0.0910272	0.0185968	0.0114325	0.0140028	0.0450234	0.0411623	0.0426534	0.0308139	0.0480338	0.0400346	0.0327714	0.0081613	0.0403563	0.0365901	0.00728004	0.00486732	0.0032432	0.035024	0.0324933	0.0264844	0.0168104	0.00501279	0.0443457	0.00845751	0.017438	0.0114085	0.0272122	0.0250459	0.00196053	0.0313136	0.0277603	0.0141573	0.0424009	0.0278016	0.0259302	0.029029	9.02e-06	0.000736004	3.2e-06
Cer(d18:1/18:0)	0.0160588	0.0263477	0.00762907	0.0214657	0.0209784	0.0151817	0.0410744	0.0509543	0.0328027	0.0525596	0.0288386	0.00820208	0.0140059	0.0398315	0.0335118	0.034814	0.0365434	0.052573	0.0256202	0.0259919	0.012513	0.0199647	0.0219573	0.00257529	0.0069201	0.00398861	0.0197269	0.0246864	0.0256558	0.00991618	0.00301496	0.0338015	0.00708413	0.0038846	0.0095363	0.0313907	0.024649	0.002516	0.0291199	0.0452866	0.0232884	0.0204774	0.0243583	0.0281745	0.0274078	2.09e-05	0	1.29e-05
Cer(d18:1/20:0)a	1.26e-05	0.00024611	6.39e-05	0.000236106	0.000116667	1.93e-05	0.000251591	0.000983551	0.000289455	0.00214675	0.00128616	0.00123799	0.00247034	0.000110898	5.66e-05	0.000130329	0.00885631	0.000904838	6.3e-05	0.00446405	3.73e-05	0.000136888	4.96e-05	0.00196662	0.000620493	0.00239246	0.000129214	0.000199051	0.00010176	0.000230013	9.71857e-05	0.00021579	0.00122449	0.00046116	0.000404182	0.00029289	0.000445915	0.00105158	0.00100604	0.000127341	0.00110893	0.00029253	0.000106451	0.00529479	0.00064022	6.26e-06	8.79e-06	0
Cer(d18:1/20:0)b	0.00596518	0.00752681	0.00076805	0.00485184	0.00700793	0.00476419	0.0136664	0.0158916	0.0118521	0.0269855	0.00880062	0.00375982	0.00507621	0.0121913	0.0136251	0.0238162	0.0106383	0.0212563	0.0114843	0.00813604	0.0061114	0.00758164	0.00517506	0.000563414	0.00140047	0.000337252	0.00343683	0.0104921	0.0132555	0.00604487	0.000719054	0.0149296	0.00226322	0.00171281	0.00269567	0.00655118	0.00528225	0.000445103	0.0130832	0.0255926	0.00600256	0.0136377	0.0103545	0.0164101	0.00471904	8.7e-06	1.3e-05	0
Cer(d18:1/23:0)a	5.87e-06	3.05e-05	6.49e-07	5.76e-05	1.95463e-05	3.38e-05	0.000109749	0.000233061	3.25e-05	2.31e-05	7.76e-06	1.48e-05	8.24e-07	1.98e-05	2.01e-06	7.35e-05	3.86e-05	0.000194899	6.33e-06	2.15e-07	5.1e-05	2.41e-05	3.75e-06	3.22e-05	8.15e-06	8e-06	1.37e-05	6.01e-05	4.63e-05	1.42e-05	2.89072e-06	3.35e-05	2.01e-06	2.42e-05	1.12e-05	8.81e-06	1.92e-05	1.34e-05	0.000101122	2.11e-05	2.51e-06	1.9e-06	2.57e-06	2.72e-05	3.87e-05	3.49e-06	2.67e-06	4.5e-06
Cer(d18:1/23:0)b	0.00677868	0.00813833	0.000508014	0.00353749	0.00296858	0.00299986	0.0125365	0.0248382	0.0229581	0.010948	0.00380989	0.00218917	0.00188992	0.0137275	0.0161334	0.0229154	0.00609676	0.018448	0.0123033	0.00327654	0.00560496	0.00476322	0.00482794	0.000676956	0.00167979	0.000206779	0.00334949	0.0119891	0.0102893	0.00300058	0.0007664	0.0164342	0.00168512	0.00133018	0.00205756	0.00387291	0.00343665	0.000395949	0.00851984	0.00956481	0.00345629	0.0130905	0.0117058	0.0118099	0.00258175	1.08e-05	1.02e-05	6.44e-06
Cer(d18:1/24:0)a	0.000326168	0.000278437	6.02e-05	0.000878987	0.000341375	3.67e-05	0.00041787	0.00761446	0.00181863	0.000100812	2.49e-05	5.43e-05	8.41e-05	0.000308518	0.000241578	0.000335364	7.34e-05	3.48e-05	0.000413213	0.000220673	5.8e-06	0.000176145	0.000176995	0.000349457	0.00045411	0.000172319	0.00037556	0.000275478	0.000371144	0.000227802	0.000148095	0.000295652	8.21e-05	9.44e-05	0.000176194	0.000226848	0.000728718	4.36e-05	0.000721101	0.000216625	0.000292915	0.00037328	0.000397084	0.000228072	0.000126609	1.24e-06	1.68e-06	3.98e-06
Cer(d18:1/24:0)b	0.0132874	0.0152366	0.000621227	0.0166472	0.009807	0.00705764	0.0296404	0.0545071	0.0417718	0.0434934	0.0113692	0.00233032	0.00167826	0.0310332	0.0341471	0.0328409	0.0124541	0.0262465	0.0240773	0.00744195	0.00497407	0.0212295	0.00763708	0.00262671	0.00371046	0.0007969	0.00583205	0.0258475	0.0226868	0.00839315	0.00200084	0.0265998	0.0066561	0.00431704	0.00411467	0.00824884	0.0103213	0.000597876	0.0267973	0.0337154	0.00765176	0.0249246	0.018368	0.0192862	0.00579613	1.22e-05	2.95e-05	1.58e-05
Cer(d18:1/24:1)a	0.000156884	0.000522016	2.38e-05	0.00164563	0.00045273	0.000145889	0.000755518	0.00176588	0.001011	0.000547687	0.000172733	0.000166592	0.000297916	0.000399215	0.000868579	0.000310175	0.0005016	0.000484287	0.000818044	0.000237234	5.41e-05	0.00030675	0.000469687	0.000183149	0.000102784	9.04e-05	0.000402657	0.000407751	0.000141842	0.000283475	6.97173e-05	0.000320293	0.000493713	0.000269793	0.000165903	4.98e-05	0.000904434	3.33e-05	0.00225163	0.000347983	9.14e-05	0.000321674	0.000459074	0.000567423	6.52e-05	2.35e-06	2.62e-06	2.1e-06
Cer(d18:1/24:1)b	0.00752894	0.0150828	0.0012467	0.0197273	0.00847102	0.00569982	0.018518	0.041418	0.024356	0.0287435	0.0128119	0.00457542	0.00610891	0.0222323	0.0236323	0.0117175	0.0116096	0.024062	0.0269024	0.00720048	0.00360228	0.0346066	0.00760446	0.00298074	0.00374277	0.00097048	0.0138962	0.0230063	0.0157843	0.00851918	0.00185394	0.00847823	0.00428139	0.00270527	0.00242357	0.00355449	0.00890735	0.000443745	0.0183529	0.0305133	0.00987559	0.0136927	0.0145977	0.0152787	0.00129652	3.59e-06	4.26e-06	1.95e-06
Cer(d18:1/25:0)a	2.51e-05	1.4e-05	4.13e-06	7.49e-06	1.50058e-05	5.86e-06	2.85e-05	0.000263909	2.95e-05	0.000477548	1.15e-05	4.59e-07	1.41e-06	1.19e-06	3.15e-06	1.59e-05	2.65e-06	1.3e-05	6.14e-05	1.59e-05	2.01e-05	2.28e-06	6.34e-05	7.82e-06	1.15e-05	4.63e-06	2.26e-05	1.72e-05	2.97e-05	1.81e-05	1.21646e-05	1.81e-05	3.8e-06	1.1e-05	3.61e-05	7.9e-06	2.24e-05	2.63e-06	3.73e-05	1.52e-05	8.59e-06	4.61e-05	3.48e-05	3.18e-06	1.8e-05	0	6.67e-07	1.88e-06
Cer(d18:1/25:0)b	0.000829674	0.00126061	0.000102587	0.00077261	0.000625796	0.000657944	0.00219625	0.00519067	0.00407036	0.00216513	0.00101685	0.000371094	0.000536837	0.00209604	0.00291098	0.00203459	0.000985196	0.00292679	0.00218619	0.000660085	0.00064626	0.00101097	0.00107274	0.000165224	0.000213422	6e-05	0.000183275	0.00261545	0.00145064	0.000463989	0.000153599	0.00160532	0.000261395	0.000267065	0.000474062	0.000867563	0.000785636	0.00013485	0.00204942	0.00172979	0.000363109	0.00224348	0.00174943	0.00241	0.000783976	1.9e-06	1.29e-05	8.18e-06
Cer(d18:2/16:0)	0.00226805	0.00126307	0.000127209	0.0107854	0.00068193	0.000446449	0.00419833	0.0133508	0.00896729	0.00547431	0.000597059	0.000559913	0.000792856	0.00379593	0.00232534	0.00672495	0.00192569	0.00285071	0.00750692	0.00138574	0.000311387	0.00179772	0.00271993	0.000300249	5.23e-05	2.85e-05	0.00479364	0.00492012	0.0018738	0.000831157	0.000135585	0.000474228	0.00035809	0.000378851	0.000543584	0.00661436	0.00196439	3.94e-05	0.018168	0.000770716	0.000382857	0.00432411	0.00211703	0.00434518	0.00890209	1.63e-06	1.63e-06	6.95e-08
Cer(d18:2/20:0)	0.000354576	0.00059192	0.000130384	0.00158364	0.00195557	0.000553234	0.00147814	0.0042057	0.0016847	0.00307038	0.000392052	0.000804698	0.00102469	0.00162959	0.00105803	0.0012305	0.00618829	0.00333625	0.00180387	0.00623026	0.000229495	0.00107961	0.000798276	0.000200725	0.000386302	0.000140708	0.00111231	0.00211106	0.000931832	0.000715179	9.83629e-05	0.00187471	0.000353304	0.000142801	0.00101176	0.00145064	0.00158539	7.54e-05	0.00612894	0.000985915	0.000359824	0.00198014	0.000659449	0.00857749	0.00194559	2.16e-06	3.99e-07	9.66e-07
Cer(d18:2/24:0)	0.0089015	0.0161175	0.00146571	0.0209813	0.00978407	0.00653197	0.0201044	0.0448792	0.0272439	0.0328057	0.013748	0.00492261	0.00670777	0.0228837	0.0253216	0.0144179	0.0126832	0.026466	0.0301262	0.00774849	0.00432384	0.0367446	0.00831658	0.00366921	0.00404673	0.00208436	0.0152881	0.0267066	0.0174941	0.00933264	0.00216963	0.0100168	0.00487991	0.00301993	0.00227586	0.00391501	0.00970577	0.000492895	0.0212371	0.0325703	0.0106331	0.0151452	0.0155022	0.0179474	0.00160938	9.39e-06	4.57e-06	2.71e-06
Cer(d18:2/24:1);Cer(d18:1/24:2)	0.00178886	0.00286651	0.000727177	0.010034	0.00233533	0.00148349	0.00505552	0.0160128	0.00532148	0.00959786	0.00318493	0.000927807	0.00166864	0.00558682	0.00372572	0.00401406	0.00223222	0.00700924	0.00855337	0.00142356	0.000837569	0.00972005	0.00182032	0.000956775	0.000592998	0.000540202	0.0030263	0.0100457	0.00373262	0.00257452	0.000656832	0.00367763	0.00163872	0.000601228	0.000612344	0.000599384	0.00166667	0.00057373	0.0148398	0.0107598	0.00183963	0.00313367	0.00450814	0.00936552	0.000329482	3.12e-06	3.14e-06	5.84e-06
Cer(t18:0/16:0)a	4.12e-06	0.00576643	0.00096173	0.000129737	0.0231526	0.0148046	0.000598187	0.00344366	0.000871207	0.000145543	0.0146793	0.0287376	0.0231449	0.000585813	0.00357469	1.46e-05	0.000774088	0.00195805	1.1e-05	0.00338052	0.00370927	0.0051449	1.89e-06	0.00529528	0.000713376	0.00116461	1.14e-06	0.00497341	0.0036551	0.00159319	0.00202381	7.66e-07	0.0236944	0.0181366	0.00287933	3.82e-05	0.00805909	0.00154227	2.35e-05	0.0015935	0.00573042	4.85e-06	0.0110758	0.00681706	1.04e-05	4.24e-07	2.5e-06	3.7e-06
Cer(t18:0/16:0)b	8.52e-05	0.0025723	0.000703682	2.81e-05	0.0112975	0.00970344	0.00269241	0.0067141	0.00228163	0.00119253	0.00975319	0.0204526	0.0184408	0.000834682	0.00401325	0.000357565	0.000807049	0.00387127	1.43e-05	0.000637179	0.00190305	0.00212514	2.49e-05	0.00183135	0.00208907	0.00167052	4.47e-05	0.00291533	0.00223268	0.00159456	0.00205301	2.76e-05	0.0158405	0.00640256	0.000642162	0.000228974	0.0066252	0.00252027	4.16e-05	0.0010108	0.00251006	5.36e-05	0.00868114	0.00313722	1.32e-05	2.12e-05	1.11e-05	1.47e-05
Cer(t18:0/16:0)c	0.00105718	0.00228624	0.000779646	0.00340637	0.0275076	0.0155413	0.00471734	0.0132474	0.0057952	0.0060672	0.00711466	0.0123346	0.0160612	0.00678892	0.00726745	0.00446794	0.00302468	0.00659219	0.00282748	0.00594127	0.00315466	0.00645366	0.00507033	0.00223504	0.00312365	0.00216778	0.0063206	0.00705152	0.00726038	0.00292122	0.00343271	4.52e-05	0.0113699	0.0146427	0.00283588	0.0082566	0.00851115	0.0013376	0.00060294	0.00725518	0.00429087	0.00792363	0.00310453	0.00467239	0.0092852	8.27e-05	3.22e-05	3.92e-05
DG(16:0_18:1)	0.00412599	0.00439461	0.00229617	0.00218689	0.0024919	0.0042294	0.0121087	0.00539096	0.00615052	0.00149971	0.00117449	0.00113751	0.00110866	0.00156119	0.00352859	0.0048745	0.00389746	0.00648903	0.0032005	0.00231624	0.00884235	0.00439718	0.00362807	0.00136724	0.00193458	0.00049179	0.0108789	0.00210395	0.0111124	0.00187317	0.00386255	0.00259776	0.00245048	0.000312714	0.00450239	0.00632239	0.00572609	0.00139393	0.00182862	0.00705587	0.000789562	0.0145211	0.000370348	0.00110936	0.00701053	9.07e-05	0.000142708	0.000121259
DG(16:1_18:1)	0.00229877	0	0.00168609	0.00310516	0	0	0.00602409	0.00184162	0	0.00813651	0.00178838	0.00156821	0.00135551	0.000809965	0.00173874	0	0	0	0.00296368	0.00646934	0.0409346	0.00311358	0.00342595	0.000520246	0.0010941	0	0.0435641	0.00263025	0.00327024	0	0.00118673	0	0	0	0.00149692	0.00913139	0.00945245	0.00431281	0	0.0102368	0	0.00551695	0	0	0.0117781	0	0	0
DG(17:0_20:0)	0.000365174	0.00302565	0.000697738	0.00120825	0.00403417	0.00545345	0.00165568	0.0199092	0.00760405	0.000662624	0.00132742	0.000207839	0.000688012	0.000666492	0.0113485	0.00124741	0.00127986	0.00584645	0.000342775	0.00116314	0.00027274	0.000467848	0.00084437	0.000184638	0.000814195	0.000158233	0	0.00371664	0.00100572	0.000267166	0.0114984	0.00078459	0.000274961	0.000856173	0.00319207	0.000368269	0.00300634	0.00071061	0.00181121	0.0104629	0.000494886	0.00233392	0.000713926	0.00226984	0.000680213	0	0.000131796	0.000210926
DG(18:0_18:1);DG(16:0_20:1)	0.00195899	0.00118256	0.000796104	0.0012856	0.000301919	0.00109656	0.00231355	0.00413879	0.00270214	0.00632666	0.000448459	0.000345012	0.000247986	0.000143113	0	0.000974345	0.000361451	0.000858213	0.000376713	0.00406235	0.00312376	0.00419743	0.000968224	0.00113927	0.00205799	7.35e-05	0.00985408	0	0.00380587	0.000275029	0.00301559	0.00462054	0.000294264	6.06e-05	0.00208557	0.0016178	0.00136497	0.00147124	0.000485228	0.00261621	0.000103239	0.00389336	0	0.00185437	0.0331963	0	0	0.000145662
DG(18:0_18:2)	0.00504695	0.00543412	0.00610232	0.0115151	0.00174669	0.00942973	0.0222971	0.0090842	0.00540991	0.0449423	0.01566	0.0130825	0.0105513	0.000468064	0.0181424	0.0034751	0.00160687	0.013737	0.00340746	0.0160508	0.00796131	0.0270402	0.0129935	0.00910004	0.0154896	0.000806309	0	0.00254491	0.0286502	0.00270465	0.0272639	0.0179583	0.00352362	0.00703983	0.0308606	0.00480299	0.0033355	0.00167474	0.00355234	0.00941948	0.000566321	0.0201655	0.000819239	0.0210415	0.0521226	0	0	0
DG(18:0_20:3)	0.000460209	0.002459	0.00116987	0.00151191	0.000312067	0.00302182	0.00420995	0	0.000673529	0.00239359	0.00798615	0.000691784	0.000798163	0	0.000115486	0.00134907	0.000137645	0.00666464	0.00114973	0.00214836	0.002567	0.00260569	0.00378944	0.00135602	0.00352303	7.92e-05	0.00280734	0.000798972	0.00510116	0.000326626	0.00131988	0.00297066	0.000636105	0.000344471	0.00365533	0.000422158	0.000221639	0.000264866	0.000248415	0.00198534	0	0.0122045	0.000235534	0.000924697	0.00240619	0	0	0
DG(18:1_18:1)	0.0307342	0.0191445	0.0179952	0.0234604	0.0063337	0.017841	0.0337605	0.00617009	0.0119784	0.0310846	0.0252471	0.00699235	0.00385407	0.00172338	0.0044027	0.016267	0.00404872	0.0207719	0.0156857	0.0491118	0.0847884	0.0364782	0.0207255	0.0101813	0.0263013	0.00120234	0.105919	0.00896384	0.0525349	0.00575796	0.0127255	0.0641546	0.00789011	0.00130398	0.0168298	0.00715912	0.00583946	0.00399342	0.00356312	0.0308892	0.00122386	0.0523601	0.00281797	0.0141915	0.0534981	0.000231681	0.000453211	0.000453309
DG(18:1_18:2);DG(16:0_20:3)	0.0580824	0.0589739	0.0529282	0.0447047	0.0248781	0.0705998	0.0748652	0.0114192	0.0226261	0.111006	0.0826831	0.0680683	0.0338734	0.00244796	0.0107006	0.0461935	0.0109998	0.090486	0.0459015	0.109107	0.118366	0.100899	0.0759657	0.0543656	0.0598244	0.00954141	0.100669	0.048437	0.106207	0.0226536	0.0454106	0.104824	0.0318513	0.0288299	0.0288843	0.0161832	0.0146952	0.0294664	0.0201115	0.098752	0.0119406	0.118859	0.0334627	0.0181147	0.0443359	0.00012372	0.000205559	0.000193643
DG(18:2_18:3)	0.0112622	0.0214496	0.0462315	0.015833	0.00129814	0.0258462	0.00849327	0.00031659	0.00183301	0.0148741	0.0744737	0.0694897	0.0645867	0.00081686	0.00145568	0.00348657	0.00158114	0.102762	0.0141279	0.00808937	0.0825518	0.0526449	0.0910054	0.0157878	0.0196944	0.00186009	0.0312613	0.00703441	0.079797	0.0029548	0.0401537	0.0895569	0.00586486	0.0559576	0.0188991	0.00650431	0.00202784	0.00461227	0.0018213	0.00770081	0.00178712	0.0953013	0.00945342	0.0317699	0.0100255	0	0	0
DGDG(16:0_16:0)	0.000200305	0.000228766	9.63e-05	0	0.000401391	0.000195621	7.91e-05	5.47e-05	5.23e-05	0.000360271	0.000209973	0.000145504	0.00017227	0.000142258	0.000372966	0.000258514	0.00013568	9.47e-05	0.00103249	0.000502243	0.000538316	0.000582682	0.000857297	0.000374531	0.000377426	0.000327483	0.000103516	0.000325655	0.0004266	0.000166715	0.000344719	0.00037753	0.000176722	0.000239265	0.000657612	6.91e-05	0	0.000291834	0.000210208	0.000960039	0.000271834	0.00177289	0.00123948	0.000180279	9.8e-05	0	0	0
DGDG(16:0_20:1);DGDG(18:0_18:1)	0.000250866	0.000604218	0.000125669	0.000123769	0.00300469	0.00376491	0.000552176	0.000241057	0.000275403	0.000226267	0	0	0.00104764	0.00081142	0.00714812	0.00321428	0.000766199	0	0.0038247	0.00278709	0.00311471	0.00231631	0.000690403	0.00309767	0.000560613	0.000910149	0.00144881	0.00238547	0.00106844	0.00057137	0.00102677	0.000619041	0.000355342	0.000309717	0.000552753	0.000395886	0.000331488	0.00633831	0.000695231	0.00127732	0.00117368	0.00111961	0.00843394	0.00194917	0.00147314	0	0	0
DGDG(16:0_20:3)a	0.000264338	0.000141041	5.92e-05	0.000128416	0.000230337	0.000510493	0.000184883	0	0.000225232	0.000689744	0.00214253	0.000934998	0	4.9e-05	8.48e-05	0.000710814	0.000144641	0.000748075	0.000329496	0.0015573	0.00268762	0.00117604	0.000777903	0.000107375	0.000512989	5.37e-05	0.00416836	0.00132513	0.000336676	0.000464166	0.00156613	0.000336115	0.000102943	0.000333946	0.000682165	8.64e-05	0	0	0.000345109	0.0112024	0.00156891	0.00358753	0.000742971	0.000592103	8.25e-05	0	0	0
DGDG(16:0_20:3)b	0.000163974	0	0	2.93e-05	0	5.91e-05	0.000160694	0	0	0.000189877	0	0	0.000211216	2.69e-05	0	0	4.82e-05	6.15e-05	2.84e-05	0	3.42e-05	8.4e-05	0.000106222	0	0	0	5.59e-05	0	8.76e-05	7.95e-05	1.41266e-05	3.53e-05	8.94e-05	0.00069138	0.000239725	0	0	8.7e-05	0.000237143	0.0016467	0.000336022	6.41e-05	0.000973417	5.52e-05	0	0	0	0
DGDG(16:1_18:0);DGDG(15:0_19:1)	0.00187092	0.00105008	0.000476751	0.000344789	0.00243123	0.00196354	0.000796501	0.000352836	0.00082214	0.00167786	0.00120725	0.000678541	0.00189864	0.00148675	0.00422448	0.00339045	0.00111538	0.000836213	0.00822599	0.00670025	0.00704592	0.00546055	0.00261816	0.00718162	0.00226897	0.0030852	0.00386221	0.00353558	0.00509625	0.00194448	0.002815	0.00254377	0.000955592	0.00132354	0.00180238	0.000527607	0.00016247	0.00330896	0.00171022	0.0112019	0.00185395	0.00829856	0.0101699	0.0023624	0.00140722	0	0	0
DGDG(17:0_17:0)	0	0.000165043	0	0	0.00019669	0.00039842	6.6e-05	0	0	0	0	0	0.000116179	0.000134961	0.000761242	0.000262638	8.16e-05	0	0.000380513	0.00020829	0.000325056	0.000203555	0.000137039	0.000251922	9.68e-05	0.000140396	6.21e-05	0.000318559	0.000157027	7.11e-05	8.75063e-05	0.000115241	8.73e-05	0	0.000157055	3.12e-05	4.57e-05	0.00117849	9.82e-05	0.000144582	0.000234388	0.000215095	0.000779616	9.26e-05	6.98e-05	0	0	0
DGDG(17:0_17:2)	0.00330665	0.000457654	0.000208811	0.000550678	0.00151786	0.00312121	0.000789648	0	0.0009495	0.00142856	0.00251344	0.000867104	0.000813306	0.000309204	0.000990968	0.00305957	0.00137948	0.00277665	0.00181271	0.00264165	0.00240758	0.00313082	0.0040264	0.00123097	0.00146105	0.000529755	0.00355019	0.00130271	0.00175494	0.000857666	0.00211688	0.000868365	0.000865325	0.00167041	0.002942	0.000544655	0.000262297	0.000905662	0.00294159	0.0423968	0.00532562	0.0182564	0.0077582	0.00444422	0.000364657	0	0	0
DGDG(17:0_17:3)	0.000428607	7.19e-05	0	0.000451119	0.000159472	0.000458322	0.000109212	0	7.79e-05	0.000655884	0.0014786	0.000853899	0.00107989	0.000760035	0.000385232	0.000648217	0.000283037	0.000254322	0.000674368	0.000314831	0.000715871	0.000299678	0.00152152	0.000279335	8.06e-05	0.000103462	0.0017507	0.000147615	0.000958615	0.00108529	3.97637e-05	0.00017798	0.00202701	0.00168592	0	6.05e-05	4.63e-05	6.81e-05	0.000806357	0.00501956	0.0013677	0.00149044	0.00661996	0.00103941	7.12e-05	0	0	0
DGDG(18:0_18:2);DGDG(18:1_18:1);DGDG(16:0_20:2)	0.00138395	0.000199479	5.36e-05	0.000161098	0.000605444	0.00056442	0.000181793	0	0.000257109	0.000299662	0.000494063	0	0.000421057	0.0001027	0.000731735	0.000857135	0.000246241	0.000206639	0.00138961	0.00160326	0.00489943	0.00106799	0.000745347	0.00131672	0.000315662	0.000398045	0.0121141	0.000509851	0.000635343	0.00044029	0.000661587	0.000392132	0.00014987	0.000265287	0.000587195	0.000116603	7.54e-05	0.000622477	0.000695489	0.00762684	0.000529553	0.00376096	0.00276017	0.00051955	0.000328155	0	0	0
DGDG(18:0_18:3)a	0.000263137	0.000138976	5.95e-05	9.63e-05	0.000229704	0.000483268	0.000184662	0	0.00022893	0.00069476	0.00215023	0	0	0	8.91e-05	0.000706966	0.00014441	0.000748653	0.000342174	0.00155429	0.00262752	0.00118884	0.000769004	0.000128846	0.000516708	5.2e-05	0.00421965	0.00131252	0.000340786	0.000468319	0.00155168	0.000336584	8.46e-05	0.000309393	0.000680506	8.43e-05	2.25e-05	8.98e-05	0.0003417	0.01131	0.00156704	0.00358937	0.000713015	0.000590369	7.95e-05	0	0	0
DGDG(18:0_18:3)b	0.00016628	0	0	0	0	0	0.000162899	0	0	0.000196551	0	0	0	2.73e-05	0	0.000181932	4.42e-05	6.02e-05	0	0	0	8.67e-05	0.000103563	3.61e-05	0	0	4.35e-05	0	8.27e-05	8.04e-05	0	0	0.000102147	0.000719622	0.000244201	0	0	8.98e-05	0.000248128	0.00168159	0.00033806	7.11e-05	0.000945241	5.54e-05	0	0	0	0
FA 13:0	0.000286561	0.00210732	0.000278956	0.000174332	0.00337279	0.0038207	0.00238013	0.00295278	0.00126996	0.000950448	0.00136977	0.000848556	0.00195009	0.000175787	0.0015488	0.00450788	0.00115778	0.00270665	0.00155677	0.00166212	0.00105457	0.00112879	0.00233862	0.00170569	0.00113817	0.00162474	0.00143848	0.00137807	0.00248043	0.000989015	0.00121209	0.00214021	0.00256831	0.00281599	0.000439455	0.000964027	0.00109091	0.00140079	0.000870914	0.00166998	0.00103311	0.00132588	0.00112839	0.00127547	0.0047286	0.00321596	0.00283913	0.00324087
FA 15:0a	5.22e-05	0.0152092	0.00241806	4.75e-05	0.0305261	0.0128228	0.0115103	0.00974283	0.00463944	0	0.00270574	0.00198302	0.00936846	0.000590553	0.00688596	0.00139331	0.00930763	0.00549533	0.00045063	0.0060568	0.00566093	0.00263536	9.37e-05	0.00859177	0.00509078	0.0117637	0	0.00481096	0.00355557	0.00197738	0.00370422	0.00234189	0.0123111	0.00565341	0.00342633	0.000454626	0.011153	0.0056909	0.000253589	0.000798695	0.00866617	0.00012073	0.00584968	0.0035244	0.000649192	0.000535625	0.00049528	0.000429976
FA 15:0b	0.00278528	0.0127585	0.00627808	0.00203177	0.0305898	0.0160967	0.0172441	0.0110157	0.00988512	0.00340124	0.00256899	0	0.00891646	0.00643873	0.00860326	0.0167552	0.0133238	0.0137671	0.0125096	0.0105993	0.00323537	0.00883631	0.00824916	0.00955877	0.0054486	0.010109	0.00741236	0.00700526	0.0137684	0.00537852	0.00411179	0.0120184	0.0097751	0.00932295	0.00424676	0.00736509	0.00719948	0.00566129	0.00626553	0.00736229	0.00877993	0.0114286	0.00574356	0.00323562	0.0117123	0.00245081	0.00336062	0.00306953
FA 16:1	0.0146772	0.0173084	0.00704606	0.0171721	0.0248074	0.0318408	0.0380846	0.0301146	0.0248296	0.07122	0.0324132	0.0387019	0.0217018	0.0161308	0.0263459	0.0360009	0.0187251	0.0257423	0.0226785	0.039695	0.0434581	0.0297212	0.0279636	0.0253986	0.0156698	0.0191646	0.0632763	0.0211945	0.0367469	0.0213449	0.0187673	0.0280037	0.0196443	0.0184849	0.0216503	0.0225694	0.0226318	0.0174338	0.0151228	0.0423606	0.0140818	0.0323927	0.0200283	0.0147682	0.0288947	0.00237463	0.00203034	0.00212441
FA 16:2	0.000490336	0.000134432	7.71e-05	0.00185132	0.000433327	0.000595324	0.000417886	0.000546405	0.000560779	0.001978	0.0032745	0.00164358	0.00040396	0.000367411	0.000953141	0.0011823	0.000250011	0.000877951	0.000422292	0.00162267	0.00110242	0.0012847	0.000559425	0.000495813	0.000756398	0.000611353	0.00195741	0.000718506	0.00118374	0.000778663	0.000967868	0.00129329	0.000302816	0.00250099	0.000835521	0.000629536	0.00132464	0.000764458	0.00194074	0.0106922	9.1e-05	0.00104519	0.00207	0.00223967	0.000830925	0	0	0
FA 17:0a	0.00677449	0.0175123	0.00655218	0.00122609	0.0392027	0.0162071	0.024242	0.0237786	0.0144073	0.00832761	0.00429942	0.00151139	0.00193689	0.00947244	0.0146414	0.0263389	0.0100223	0.0111835	0.0238982	0.0130716	0.00231567	0.00850997	0.00675214	0.00928571	0.00486217	0	0.0136452	0.0118125	0.0171893	0.00557847	0.00531726	0.0167485	0.0107203	0.00906316	0.00383491	0.0100199	0.00845029	0.00517319	0.0112919	0.00894331	0.00593715	0.0125444	0.00757834	0.00740126	0.0179697	0.00140987	0.00161782	0.00135888
FA 17:0b	0.00927646	0.0119613	0.00619788	0.0111621	0.0434095	0.0225397	0.0323309	0.0237657	0.0214966	0.0378879	0.0121419	0.00362095	0.0102323	0.0208668	0.0194844	0.0238181	0.0132261	0.0162232	0.0274609	0.0189901	0.0085335	0.0156181	0.0222555	0.0131677	0.00934538	0.0157741	0.0221987	0.0137085	0.0234451	0.0105629	0.0085235	0.0246331	0.0103609	0.0132628	0.0117254	0.0148222	0.0205938	0.00890747	0.0125856	0.0224905	0.0139187	0.0238606	0.0122296	0.00560826	0.017313	0.00780275	0.0106069	0.00857261
FA 17:1a	0.00275865	0.00498595	0.000794955	0	0.00643421	0.00905692	0.00944027	0.00887156	0.0050702	0.0358485	0	0	0.00594827	0.00721623	0.00211604	0.0138307	0.00229312	0.00326345	0.00939693	0.0082327	0	0.00778769	0.0127703	0.00383329	0.00306516	0.00177356	0.0315578	0.00390704	0.00910902	0.00588579	0.0028349	0.0111701	0.00544458	0.00626527	0	0.00518268	0.00168793	0.00377228	0.00601588	0.00780014	0.00417086	0.0121634	0.00164856	0.00164863	0.0157821	0	0	0
FA 17:1b	0.0036156	0.00172919	0.000168996	0.0154626	0.00289089	0.00724171	0.0286224	0.0236443	0.026764	0.0256692	0	0	0.00366886	0.0213744	0.00461118	0.0278585	0.0173389	0.0137346	0.0114728	0.00870153	0.0110397	0.00250719	0.0225887	0.00704277	0.00285382	0.0158137	0.032196	0.00847046	0.0014578	0.0058279	0	0.0238658	0.00392377	0.00309238	0	0.0155269	0.00775577	0.0118789	0.0123698	0.00291686	0.00403731	0.0302815	0.00601973	0	0.0244056	0	0	0
FA 17:2	0.000143566	4.84e-05	6.81e-05	0.000329268	0.000363731	0.000687456	0.000141218	7.82e-05	0.000143467	0.00231568	0.00240507	0.0016976	0.000385307	0.000463174	0.000315669	0.00188185	0	0.000603127	0.000117288	0.000537598	0.000432235	0.00107069	0.000240027	0.000279581	0.00022978	0.000170496	0.00127842	0.000301491	0.00052306	0.000435147	0.00067858	0.000272447	0.000272936	0.00137608	0.000509393	0.000230024	0.000105189	0.000280395	0.000526061	0.00147699	7.19e-05	0.00114689	0.000363417	0.000886947	0.000310392	0	0	0
FA 18:3	0.0169311	0.0157959	0.022919	0.0202213	0.0573275	0.035685	0.0360413	0.00509963	0.0159758	0.0351392	0.0749363	0.12403	0.0361671	0.0238278	0.0193552	0.0487934	0.0102516	0.0298134	0.0106646	0.0320535	0.0278208	0.0349573	0.0469074	0.0124024	0.0144184	0.024027	0.0776223	0.0117916	0.0375867	0.0185388	0.0207522	0.0356133	0.0323647	0.0230152	0.0126091	0.0213043	0.00771625	0.0143943	0.0258965	0.048076	0.0144107	0.0669938	0.0217095	0.0184076	0.029554	0	0	0
FA 19:0a	0.000930951	0.00190405	0.000618089	0.00055277	0.00390202	0.0039974	0.00765541	0.00803173	0.00574263	0.00266949	0.00248533	0.00846291	0.00143568	0.0130871	0.00487855	0.00691022	0.00302628	0.00243917	0.00326528	0.0113486	0.000432252	0.00549177	0.000972476	0.00363169	0.00131227	0.0019704	0.00538962	0.00484379	0.00750321	0.00343953	0.00276645	0.00399755	0.0029476	0.00359262	0.00148585	0.00255414	0.00112397	0.00360776	0.00688048	0.00378619	0.00462429	0.00422685	0.00242544	0.00396512	0.00857052	0.00153276	0.00169878	0.0015681
FA 19:0b	0.00272986	0.0055679	0.00262428	0.00568123	0.0289839	0.020955	0.0272259	0.0158879	0.0137137	0.00693407	0.00530787	0.00349724	0.00425299	0.02271	0.0122311	0.0242107	0.0149688	0.0086966	0.0141589	0.0270408	0.00311891	0.0132959	0.00650306	0.0134092	0.00887513	0.0116562	0.0118984	0.013051	0.0158672	0.00978769	0.00369419	0.0247546	0.00964124	0.00998021	0.00911087	0.0119045	0.00334261	0.0114187	0.0111708	0.0280739	0.016644	0.0154523	0.00860482	0.00778008	0.0188901	0.00162045	0.00192692	0.00174493
FA 19:1a	0.00131676	0.000257835	0.0001432	0.00412239	0.00510176	0.00649767	0.00848854	0.00560302	0.00632373	0.0222192	0.00592959	0.00248883	0.00558813	0.0119408	0.00459218	0.0107824	0.00101487	0.00133345	0.00545071	0.0104828	0.00133555	0.00418894	0.00460787	0.00224689	0.00177308	0.00188293	0.00845226	0.00291105	0.00341013	0.00235999	0.00147534	0.00687491	0.00547742	0.00466552	0.0040783	0.00317657	0.00222416	0.00171056	0.00624092	0.00973891	0.00195123	0.00941777	0.00373752	0.00146536	0.0106651	0	0	0
FA 19:1b	0.00699667	0.00751246	0.000853535	0.0105656	0.0127276	0.0125638	0.0246432	0.0196562	0.0231901	0.0287045	0.00607965	0.001431	0.00996901	0.0231622	0.00669836	0.0259158	0.0135856	0.00794382	0.0191803	0.0163891	0.0024615	0.00952934	0.0245683	0.0131361	0.00543079	0.0129722	0.0208884	0.0107279	0.00748748	0.00490042	0.00791935	0.0266125	0.0108808	0.00879781	0.00583309	0.0146192	0.00640338	0.0093046	0.0129398	0.00909686	0.0143763	0.02526	0.00832943	0.00681826	0.0181113	0	0	0
FA 19:3	0.000124515	0.000215122	5.83e-05	0.000105861	0.000749095	0.000475953	0.000727487	0.0013542	0.000506826	0.000454695	0.000203819	0.000236083	0.000373762	0.000260286	0.000393526	0.000555917	0.000126545	0.000273782	0.000155865	0.000182975	0	0.000283332	0.000650572	0.000191349	0.000117531	0.000289861	0	0.000229559	0.000639911	0.000156481	0	0	0.000204416	4.72e-05	0.000189546	0.000175366	7.85e-05	5.49e-05	0.000183985	0.000222681	0.000229166	0.000613353	0.000244343	5.42e-05	0.00023344	0.00351809	0.00345064	0.00385921
FA 20:0a	0.0139493	0.0298293	0.020606	0.0207783	0.0929942	0.0443058	0.0421081	0.0389682	0.0248472	0.0596415	0.0249692	0.0280143	0.0205309	0.0339992	0.0227439	0.0425213	0.0302246	0.0360886	0.034049	0.0392624	0.0192048	0.0272223	0.0340862	0.0241767	0.0192363	0.026519	0.0298923	0.0223276	0.0332256	0.0171238	0.0172984	0.0473618	0.0236365	0.0377565	0.0213583	0.0251006	0.018306	0.0205096	0.0230316	0.0360005	0.0272099	0.0395619	0.0163519	0.0193166	0.0355968	0.0333398	0.0364077	0.0320703
FA 20:3a	0.00448924	0.00347765	0.000361402	0.0132842	0.00362041	0.00662253	0.0227096	0.0322411	0.0234754	0.00964725	0.00542618	0.00155539	0.00280866	0.0257088	0.0257577	0.0171153	0.011083	0.0190233	0.0170604	0.0164205	0.00684584	0.0128185	0.0111658	0.0119076	0.00499088	0.00260495	0.0207831	0.0170341	0.0108909	0.0108816	0.00506127	0.0202112	0.00357667	0.0142831	0.00579212	0.0110511	0.0175862	0.0105458	0.0129489	0.0168154	0.00462807	0.015494	0.0141564	0.0108541	0.0123873	0	0	0
FA 20:3b	0.00924002	0.00456251	0.000106024	0	0.00109671	0.00229632	0.00428683	0.0128309	0.00374757	0.00137242	0.00520519	0.000715675	0.000219584	0.0107256	0.00557749	0.00219326	0.00379381	0.0174812	0.0101277	0.0309415	0.010455	0.0214027	0.000492416	0.018866	0.00806677	0.00175014	0.00733466	0.00551604	0.0112928	0.011252	0.00168342	0.0052315	0.00195799	0	0.00101576	0.00145343	0	0	0.00337358	0.026248	0.00384672	0.00207258	0.00265853	0.0055634	0.00106773	0	0	0
FA 20:4	0.00709665	0.00541375	0.000593889	0.00810991	0.00366255	0.00264897	0.023242	0.0262966	0.0235643	0.028766	0.0106729	0.00570494	0.000567326	0.0226801	0.0137752	0.0191172	0.00488171	0.0148066	0.0179683	0.00706273	0.00233828	0.0126541	0.0158249	0.00442562	0.00387828	0.00177553	0.0161494	0.00805348	0.0138872	0.00817672	0.00268917	0.0260759	0.00413599	0.00166226	0.00155527	0.0115103	0.00289603	0.000757124	0.015744	0.0185017	0.00512294	0.021431	0.00413199	0.00457765	0.013757	0	0	0
FA 21:0a	0.00214744	0.00619835	0.00480863	0.00686407	0.0303471	0.0169268	0.0121086	0.0111921	0.00522502	0.0084027	0.00999134	0.0083261	0.00614561	0.0131861	0.00632645	0.0189848	0.0108221	0.00858219	0.0106258	0.0208727	0.00725779	0.0108965	0.00831188	0.0129525	0.00514035	0.0109649	0.00451904	0.0112182	0.0115205	0.0081569	0.00689383	0.0320059	0.0129413	0.0189764	0.00689324	0.00946887	0.00319837	0.0100032	0.010195	0.0119342	0.0119622	0.0117765	0.00529194	0.00638394	0.00783546	0.000477517	0.000557109	0.000576768
FA 22:0	0.0262641	0.0575706	0.0480085	0.0346501	0.182108	0.0821144	0.0953551	0.0769321	0.0477233	0.0328388	0.0585159	0.0418528	0.0402224	0.0522125	0.041559	0.0756183	0.0490752	0.0580368	0.0366329	0.0818783	0.0506294	0.0584895	0.081505	0.0740442	0.0431201	0.0512029	0.0393226	0.0538448	0.0659688	0.0338857	0.04154	0.0884125	0.0533296	0.0842772	0.0534545	0.0459261	0.0220083	0.0413958	0.0426684	0.0560949	0.047757	0.0718802	0.0336912	0.037679	0.0468547	0.0093198	0.011086	0.00878346
FA 22:1	0.00329101	0.0170509	0.00599735	0.016784	0.0416126	0.0384468	0.0446617	0.0338375	0.0163583	0.0149993	0.0485455	0.00691401	0.0135713	0.0519731	0.00704645	0.010793	0.0233346	0.0160556	0.0198919	0.0454464	0.00669965	0.0136926	0.0563101	0.0244138	0.00741207	0.0228115	0.0164891	0.0147611	0.0212127	0.0128334	0.0125654	0.00993414	0.0218521	0.0155076	0.00703917	0.0194828	0.00845638	0.0118761	0.011298	0.0121596	0.0125752	0.0135964	0.0078215	0.00823179	0.00812873	0.000759669	0.00107294	0.000401632
FA 22:2	0.000215447	0.00477693	0.000506075	0.00152663	0.0576581	0.0332758	0.00386733	0.00549693	0.00263303	0.000968746	0.00321687	0.000308879	0.00715172	0.0083728	0.00238568	0.00107207	0.00900303	0.00224245	0.00160243	0.00567999	0.000606404	0.00242959	0.0023823	0.000912556	0.0011188	0.0034668	0.0026509	0.00135307	0.00193977	0.00159647	0.00185606	0.00142298	0.0073955	0.00253308	0.00112067	0.00058132	0.000382164	0.000114516	0.00527503	0.00541014	0.00893049	0.00138239	0.00294578	0.00201575	0.000806686	0	0	0
FA 22:3a	0.000220751	0.00264557	0.000227107	0.00178389	0.00544859	0.00952903	0.00273144	0.00291347	0.00290765	0.000394852	0.00050915	0	0.00594352	0.00890585	0.00134442	0.000884399	0.00724866	0.00652292	0.0013339	0.00179411	0.000246404	0.00112819	0.00133418	0.000395582	0.00162078	0.00278084	0.00354024	0.00123679	0.000969631	0.00158789	0.00501934	0.000548251	0.00720373	0.00736246	0.000840708	0.000654793	0.000605216	0.000186343	0.00387422	0.00293681	0.00197261	0.000855421	0.00182905	0.000707988	0.000516521	0	0	0
FA 22:3b	0.000350855	0.000221651	4.22e-05	0.00217043	0.00275903	0.0152548	0.00167895	0.00123461	0.00114281	0.000175142	0.000341357	3.88e-05	0.00812072	0.00629629	0.00196213	0.00060877	0.00186346	0.00215591	0.000567188	0.00136713	0.000223254	0.00228868	0.000477469	0.00039283	0.000770566	0.0020816	0.00471482	0.000786338	0.000543308	0.00392045	0.00416709	0.00190913	0.00645362	0.00458888	0.00840963	0.000648664	0.000464495	6.01e-05	0.0024013	0.0070236	0.00294568	0.00101124	0.00375374	0.000773688	0.000184836	0	0	0
FA 22:4	0.00240528	0.00373902	0.000276375	0.0153201	0.00333532	0.00828163	0.0211862	0.0239221	0.0164649	0.0105013	0.0117961	0.00280823	0.0109874	0.0299207	0.0225037	0.0145176	0.00627753	0.0169816	0.0145327	0.0163027	0.00356526	0.013282	0.00737365	0.00799821	0.00384944	0.00563139	0.0306559	0.0149647	0.0124927	0.011842	0.0109731	0.0077335	0.00540016	0.0146682	0.0165465	0.00971261	0.0129798	0.0066377	0.0186846	0.0248426	0.00971592	0.0133239	0.0132207	0.0102328	0.00769883	0	0	0
FA 22:5	0.00421365	0.00293085	0.000225075	0.0197125	0.00187758	0.0033507	0.0218264	0.0336221	0.0251445	0.0199887	0.0362443	0.00576004	0.00101527	0.0272567	0.0279853	0.0165185	0.00210385	0.00762855	0.0163509	0.0256766	0.00720216	0.017513	0.00731735	0.0149855	0.00635369	0.00155049	0.0122414	0.0248941	0.0127311	0.0088834	0.00340712	0.0211273	0.00227495	0.0156993	0.0128988	0.00716506	0.0156272	0.0104933	0.0220864	0.0154191	0.00504977	0.0103299	0.013484	0.0132165	0.00926447	0	0	0
FA 22:6	0.00390577	0.0013551	3.36e-05	0.00599325	0.0025021	0.00242985	0.0143206	0.0165763	0.0210882	0.0641008	0.00873944	0.000711946	0.000365147	0.0434779	0.00765227	0.01297	0.00112231	0.00447188	0.0180392	0.0134891	0.0038489	0.010104	0.0095627	0.00352701	0.0017871	0.0010382	0.0120565	0.00440739	0.00700784	0.00422024	0.000560442	0.0268979	0.000865565	0.00102568	0.000370558	0.00819306	0.000713946	0.000242544	0.021522	0.00698688	0.00101196	0.00834983	0.000551268	0.000231123	0.0117793	0	0	0
FA 23:0	0.0150448	0.0428409	0.0305564	0.0212419	0.0936624	0.0529558	0.0321863	0.0412978	0.0235276	0.0187712	0.0282585	0.0246873	0.0228808	0.0317772	0.027773	0.0429865	0.0371272	0.0388371	0.0275693	0.0551825	0.0456019	0.0434789	0.0310906	0.0473031	0.0291341	0.0400129	0.0173672	0.0360861	0.0407187	0.0253478	0.0286567	0.0549929	0.0343982	0.0502627	0.0268535	0.0323451	0.0198425	0.0330393	0.0227669	0.0282679	0.0333466	0.0378475	0.0187475	0.0266512	0.0259631	0.00231658	0.0023422	0.00182567
FA 24:0	0.0283298	0.0531772	0.0470343	0.0320175	0.175562	0.0778962	0.0681952	0.0548612	0.0429736	0.0563719	0.0469073	0.0316056	0.0316716	0.0499587	0.039191	0.0637916	0.047864	0.0572076	0.0430864	0.066687	0.0514194	0.0560947	0.0627252	0.0561971	0.0369564	0.0484678	0.031254	0.0433487	0.0649067	0.0338163	0.0361162	0.070722	0.0352776	0.066449	0.0352166	0.0394864	0.0255061	0.0375377	0.0306923	0.0301282	0.0435839	0.0635383	0.0286243	0.032266	0.0423203	0.00756847	0.0076563	0.0067377
FA 24:1	0.0136682	0.0367262	0.0196223	0.0292379	0.0817609	0.0574486	0.041492	0.0596915	0.0403131	0.0261713	0.0374488	0.0239413	0.0354498	0.0524265	0.0301261	0.0212742	0.0304833	0.0381333	0.0273873	0.0485439	0.0312909	0.0451644	0.0368286	0.0270345	0.0196736	0.0313373	0.0242852	0.0345517	0.0368037	0.0250555	0.0256153	0.0302045	0.0363989	0.0351092	0.0188309	0.0263855	0.0214664	0.02265	0.0312309	0.0242977	0.0268486	0.0332732	0.0185253	0.0249153	0.0224774	0.000110926	0.000139025	4.83e-05
FA 25:0	0.00298327	0.0091191	0.0118507	0.00960073	0.0432575	0.012655	0.010558	0.00775679	0.00427898	0.00932245	0.0130254	0.015777	0.00598068	0.00825917	0.00557907	0.015135	0.0131328	0.0208381	0.0116697	0.0277954	0.0141673	0.0176347	0.0121342	0.0156728	0.0110021	0.0162049	0.00351137	0.0135882	0.0168846	0.0101484	0.00998737	0.0266383	0.00913161	0.0199738	0.0108421	0.00730901	0.00572957	0.0119207	0.00969354	0.00917075	0.0161315	0.0140406	0.00494854	0.00969025	0.00684901	0.000457247	0.000483973	0.000345465
FA 26:0	0.0116432	0.0419913	0.0353302	0.0219723	0.1129	0.0582144	0.0385089	0.0269937	0.0177177	0.00640147	0.0235933	0.0267361	0.0164929	0.0272301	0.0249289	0.0377974	0.0383716	0.044616	0.0271928	0.050671	0.0359519	0.039783	0.0389393	0.0445063	0.0326668	0.040565	0.00831427	0.0287321	0.0422731	0.0268617	0.0264273	0.0478784	0.0208993	0.0381114	0.0263609	0.027896	0.018476	0.0301783	0.016586	0.0263743	0.034938	0.0405958	0.021859	0.0186437	0.0190958	0.00108344	0.00132393	0.000943776
FAHFA(14:0/O-16:2)	6.57e-05	0.000184208	3.57e-05	3.33e-05	0.00140469	0.000288714	0.000683032	0.000765649	0.000362531	0.00103637	0.000103359	0	0.00025118	5.7e-05	0.000177777	0.00110633	0.000244064	0.000591529	0.000436638	0.000342784	0.000111051	0.000223266	0.000801658	0.000142226	5.9e-05	0.000127217	0.000432695	0.000196076	0.000577847	0.000101757	6.08228e-05	0.000861206	0.000187929	0.000275072	9.04e-05	0.000214263	0.000141184	0.000113231	0.000486838	0.00032037	6.43e-05	0.000591274	9.03e-05	0.000115095	9.64e-05	0.0107204	0.00666006	0.00698849
FAHFA(16:0/O-18:2)	0	0	0	0	0.00122617	0.000218955	0.00109471	0.000701608	0.000854269	0.00155974	0	0	7.61e-05	0.000294373	0.000472624	0.00190231	0.0001878	0.000616968	0.00100095	4.86e-05	3.76e-05	0	0.000513316	5.55e-05	0	8.37e-05	0.000689765	0	0.000859932	8.79e-05	0	0.00132474	1.97e-05	0	2.09e-05	0.00025743	3.15e-05	0	0.00124481	0.000811843	0.000380075	0.000973993	6.74e-05	0	0.00103918	0.0130401	0.0086796	0.00999476
FAHFA(17:0/O-19:2)	0	5.21e-05	0	0	0.000616406	0.000154097	0.0010098	0.000572374	0.000791382	0.000228692	2.6e-05	0	1.87e-05	0.000257553	0.000418406	0.00132272	9.21e-05	0.000108287	0.000697744	0.000151766	0	0.000146734	0.000153706	6.4e-05	2.49e-05	2.6e-05	0.000114201	0.000122318	0.00049739	7.81e-05	2.56371e-05	0.00014622	6.25e-05	7.71e-05	3.67e-05	0.000309549	0.000112732	7.96e-05	0.000535576	0.000652437	0.000225996	0.000587138	0.000214471	2.21e-05	0.000708319	3.07e-05	3.03e-05	2.84e-05
GM3(d18:1/16:0)	9.59e-05	4.62e-05	0	0.0010989	0	0	0.0011454	0.000430655	0.000788668	7.44e-05	5.72e-05	3.13e-05	0	0.00426063	0.000266558	0.000172939	0	3.08e-05	0.000818501	0	1.83e-05	2.04e-05	0.00158616	0	0	0	0.00196271	8.19e-05	0.000107169	5.54e-05	0	0.000217104	0	0	6.79e-05	0.00127283	0	0	0.00010956	0	0	0.00233363	0.00061273	0	0.00108754	0	0	0
GM3(d18:1/18:0)	7.51e-05	3.81e-05	7.57e-06	0.000704719	0	0	0.00221449	0.000222274	0.000360094	7.21e-05	4.62e-05	3.29e-05	0	0.00124222	0.000506098	0.000127255	0	4.28e-05	0.0006612	0	2.43e-05	0	0.0028304	0	0	0	0.00384992	0.000159576	0.00057817	1.81e-05	0	0.000115537	0	0	4.29e-05	0.0017315	8.59e-06	0	8.79e-05	1.68e-05	0	0.00219343	0.000656803	0	0.000681336	0	0	0
GM3(d18:1/22:0)	0.00026517	8.64e-05	0	0.0010535	0	0	0.00252178	0.000861846	0.00117211	0.000197468	5.29e-05	4.98e-05	0	0.0036089	0.00124459	0.000759738	0	0.000196681	0.00102104	0	7.71e-05	6.25e-05	0.00471703	0	1.61e-05	0	0.00441687	0.000204375	0.000457746	4.87e-05	0	0.000649485	0	0	0.000187563	0.00152635	0	0	0.000110712	2.51e-05	0	0.00539653	0.000860867	0	0.0024389	0	0	0
GM3(d18:1/24:0)	8.51e-05	5.21e-05	8.01e-06	0.000292627	0	0	0.00188792	0.000548024	0.000857045	0.000230814	7.61e-05	5.9e-05	0	0.00212575	0.000893594	0.000388013	0	0.000108984	0.000384522	0	3.57e-05	2.92e-05	0.00208995	0	0	0	0.00266056	0.000163931	0.000252642	0	0	0.000373592	0	0	0.00010177	0.000748717	0	0	4.85e-05	2.43e-05	0	0.00329851	0.000577985	0	0.00143011	0	0	0
HexCer(d18:1/22:0)a	2.78e-06	6.97e-05	0	4.13e-05	0.000252512	0.000248325	7.93e-05	1e-05	6.54e-06	5.7e-05	0.000100878	6.53e-05	3.65e-05	6.01e-05	1.45e-05	0.000261026	0.000213851	5.37e-05	0.000322087	0.000215377	0.000104477	0.000158569	7.62e-05	4.45e-05	9.24e-05	0.00024503	2.76e-05	4.32e-05	8.44e-05	3.83e-05	3.28312e-05	0.00111039	9.91e-05	7.28e-05	5.16e-05	0.000172481	0.000121564	6.26e-05	1.85e-05	3.08e-05	2.78e-05	0.000219106	5.24e-05	2.54e-05	0.000299983	2.33e-06	5.45e-06	6.03e-06
HexCer(d18:1/22:0)b	0.00181365	0.00457285	0.000126849	0.00405413	0.00084992	0.000780051	0.00778882	0.0033928	0.00426018	0.00114955	0.0102584	0.00327817	0.000553329	0.00310785	0.000955336	0.00298638	0.000485815	0.00363207	0.005461	5.7e-05	0.000690809	0.000963202	0.00359987	5.18e-05	0.000276116	2.69e-05	0.0105855	0.00176136	0.00258771	0.00228347	0.000183149	0.00917921	0.000707686	0.000500795	0.0009305	0.00535149	0.00458947	5.26e-05	0.00308435	0.00174197	0.000126355	0.00229899	0.00713745	0.00117954	0.00747191	2.89e-06	2.69e-06	5.11e-06
HexCer(d18:1/23:0)a	2.69e-05	6.28e-05	2.59e-05	6.74e-06	8.58264e-06	1.64e-05	1.56e-05	1.12e-05	6.77e-06	2.86e-05	3.44e-05	3.68e-05	1.1e-05	1.04e-05	6.94e-06	0.000161373	2.09e-05	5.9e-05	0.000264308	7.88e-06	4.95e-05	3.07e-05	6.33e-06	2.94e-06	3.52e-06	1.34e-05	8.7e-05	5.57e-05	0.000100513	4.01e-05	2.55063e-06	0.000728108	2.19e-05	1.57e-05	2.01e-05	5.46e-05	9.65e-05	3.46e-06	4.98e-06	2.05e-06	6.97e-07	2.82e-05	4.31e-05	1.59e-05	7.42e-05	3.54e-06	6.85e-06	3.34e-06
HexCer(d18:1/23:0)b	0.000748877	0.00165133	4.13e-05	0.0008684	0.000224674	0.000191647	0.00239363	0.00100639	0.00160152	0.000154909	0.000998192	0.000505383	9.89e-05	0.00168582	0.000307861	0.00154118	0.000125363	0.00090861	0.00316855	1.69e-05	0.000486752	0.000406505	0.00109142	2.85e-05	0.000134854	2.46e-05	0.00355724	0.000761834	0.00153364	0.00072746	8.48903e-05	0.00524944	0.000210117	0.000161604	0.000378534	0.00233211	0.00204648	3.6e-05	0.000987999	0.000391432	3.97e-05	0.000840418	0.00161422	0.000305236	0.00550985	3.01e-06	4.7e-06	4.76e-06
HexCer(d18:1/24:0)	0.00119632	0.00203638	8.79e-05	0.00366702	0.000769806	0.00054325	0.0050091	0.00188633	0.00232485	0.00114339	0.0102802	0.00383924	0.000421031	0.00247369	0.000688024	0.00157682	0.000234107	0.00104699	0.00459127	5.42e-05	0.000653168	0.000701256	0.00367631	0.000128495	0.000322109	2e-05	0.0157841	0.0016494	0.00432309	0.00189544	0.000137835	0.00469327	0.000558527	0.00028177	0.000475435	0.00529385	0.00262929	3.01e-05	0.00213463	0.00157298	0.000164464	0.00146497	0.00461853	0.000632411	0.00418583	4.3e-06	5.14e-06	1.83e-06
HexCer(d18:1/24:1)	0.000553308	0.00121326	4.2e-05	0.00967211	0.000677342	0.000364158	0.00441595	0.00247293	0.00213199	0.000875487	0.00620846	0.00255463	0.000550036	0.00301461	0.000442199	0.000544258	0.000168625	0.00088491	0.00285284	4.7e-05	0.000144728	0.000794241	0.00325398	3.6e-05	5.76e-05	8.1e-06	0.00833853	0.00226119	0.00249712	0.00125145	9.48312e-05	0.0018352	0.000286096	0.000141447	0.000408613	0.00237192	0.00281278	3.7e-06	0.00163547	0.000814261	7.09e-05	0.000535523	0.0054625	0.00101522	0.00134898	2.38e-06	5.34e-06	3.93e-06
HexCer(d18:2/22:0)a	9.09e-06	9.27e-05	4.22e-06	0.000675833	2.61909e-05	2.03e-05	0.000104444	9.16e-05	9.75e-05	3.72e-05	0.000304768	5.91e-05	2.37e-05	6.66e-05	1.49e-05	4.09e-05	1.52e-05	7.47e-05	0.000100138	1.78e-06	2.09e-06	1.15e-05	0.000153131	8.34e-06	1.52e-05	3.06e-06	0.000224376	0.000106694	7.62e-05	6.31e-05	6.64473e-06	1.06e-05	9.2e-06	2.67e-05	1.18e-05	3.27e-05	0.000184161	3.59e-06	5.76e-05	2.57e-05	5.4e-06	1.26e-05	0.000461189	2.84e-05	4.32e-05	3.47e-06	2.67e-06	7.99e-07
HexCer(d18:2/22:0)b	5.4e-05	0.000197371	4.9e-06	0.000282522	1.1462e-05	1.97e-05	0.000281145	0.000214185	0.000236782	1.61e-05	3.93e-05	1.52e-05	5.41e-06	2.5e-05	3.63e-05	3.16e-05	8.18e-06	8.29e-05	0.000108695	7.13e-06	1.27e-05	4.84e-06	0.000137256	2.05e-06	4.61e-06	1.37e-06	0.000192183	7.79e-05	0.000183247	5.96e-05	1.20992e-05	3.96e-05	2.02e-05	1.41e-05	1.71e-05	0.000103965	0.000355037	3.72e-06	5.22e-05	6.61e-06	6.86e-07	3.92e-05	8.19e-05	2.33e-05	0.00011564	2.09e-06	7.23e-06	1.82e-06
HexCer(d18:2/24:1)	7.77e-05	0.000459386	2.27e-05	0.00400408	8.9105e-05	8.37e-05	0.000584613	0.000817639	0.000500334	0.000101693	0.00198106	0.000382204	7.16e-05	0.000328337	7.51e-05	5.9e-05	4.33e-05	0.000296785	0.000444397	6.92e-06	2.85e-05	0.000109179	0.000500166	6.92e-06	1.61e-05	1.3e-06	0.00108108	0.000694361	0.000315451	0.000276535	4.43418e-05	0.000359289	3.9e-05	2.87e-05	3.51e-05	0.000289848	0.0010577	4.47e-06	0.000321951	4.54e-05	1.82e-05	5.95e-05	0.00140043	0.000122718	0.000301852	4.03e-06	3.09e-06	3.2e-06
LPC(0:0/14:0)	0	0	0	0	0	0	0	4.87e-05	9.61e-05	0	0	0	0	0.002623	0	0	0	0	7.61e-05	0	0	0	3.72e-05	0	0	2.26e-05	6.28e-05	0	0	0	0	6.51e-05	0	0	0	0.000593896	0	0	6.3e-05	0.000197863	0	7.49e-05	0	0	4.93e-05	0	0	0
LPC(0:0/15:0)	9.6e-05	0	0	0	0	0	7.31e-05	0.000205773	0.000185173	0	0	0	0	0.00151816	0.000105697	0	4.91e-05	6.32e-05	0.000113476	0	0	0	0	0	0	0	0.000125232	0	0	4.13e-05	0	0.000105545	0	0	0	0.000494498	5.65e-05	0	0.000599104	9.44e-05	0	0.000128937	0	0	4.97e-05	0	6.1e-06	9.06e-06
LPC(0:0/16:0)	0.00845284	0.00191679	0.000706179	0.00112191	0	0.000285793	0.00705237	0.0191742	0.0226865	0.0020203	0.00167226	0.00167153	0.00292625	0.101752	0.019543	0.0118376	0.000286304	0.0137746	0.0170017	0.00044522	0.000377016	0.00339584	0.00405712	0.000249996	0.000249781	0.000118288	0.00496228	0.00226601	0.00209963	0.00117443	0.000212108	0.00701819	0.000445372	0.000163751	0.0012953	0.0423752	0.00769931	0.000123033	0.0102637	0.03737	0.000727355	0.0132326	0.00184673	0.000694768	0.00548698	0	0	0
LPC(0:0/16:1)	0	0	0	0	0	0	0	0	1.48e-05	0	0	0	0	0.000113318	0	0	0	0	8.82e-06	0	0	0	0	0	0	0	0	0	0	0	0	0	0	0	0	7.32e-05	0	0	0	0	0	0	0	0	0	0	0	0
LPC(0:0/17:0)	0.000882441	0.000230152	0.00013401	4.57e-05	5.66427e-05	1.73e-05	0.00128702	0.00526176	0.00411202	0	0	0.00026621	0.000595763	0.0250285	0.00339048	0.00138423	5.96e-05	0.00124917	0.0012144	0	0	0	0.000594323	5.04e-05	0	0	0.000999127	0.000249769	0.000554402	0.000195449	3.20464e-05	0.000377695	0	0	0.000393263	0.00595349	0.000937872	0	0.000939955	0.00255851	5.05e-05	0.000639201	0.000213421	8.04e-05	0.000439336	0	0	0
LPC(0:0/18:0)	0.00147202	0.00112386	0.00034823	0.000677312	0	0.000170386	0.00425918	0.0088448	0.0141899	0.00081724	0.000866029	0.00152698	0.0024504	0.124707	0.0239231	0.00605341	0.000431609	0.00448221	0.00867363	0.000151384	7.21e-05	0.00320489	0.00184304	7.61e-05	9.72e-05	7.32e-05	0.00265983	0.00206989	0.0019214	0.0011129	0.000216012	0.00336882	0.000440079	0.000569733	0.00123001	0.0106688	0.00169519	0	0.00369679	0.0159222	0.00121012	0.00367922	0.00163631	0.000625046	0.00382028	0	0	0
LPC(0:0/18:1)	0	0	0.000209595	0.000779011	0	0.0001051	0.000852051	0.00390802	0.0021267	0.000606893	0.000924822	0.0018217	0.00128198	0.0166654	0.00183297	0.00124935	0	0.00612244	0.000839124	0.000249607	0.00069768	0.0049465	0.000183354	8.85e-05	0.00673548	0	0.0011974	0.000405364	0.000431413	0.000427531	0.000100717	0.000230063	0	0	5.93e-05	0.00353027	9.94e-05	0	0.000860075	0.0106342	0.000348113	0.00274002	0.000174612	0.000309296	0.000387395	0	0	0
LPC(0:0/18:2)	8.68e-05	0.000102842	0.00104753	0.000563393	0	0.000296112	0.00123622	0.00125002	0.00116493	0.000208151	0.00446528	0.00141594	0.00719363	0.00540557	0.000637837	0.00125999	7.78e-05	0.022656	0.000372716	0.000135893	0.000487861	0.00449399	0.000175358	0.00027147	0.000246632	0	0.000438157	0.000701609	0.00116814	0.000426621	0.00038344	0.000191195	5.35e-05	5.07e-05	0.00182669	0.00820622	7.14e-05	2.97e-05	0.00066423	0.0107191	0.000181677	0.00182009	0.000121768	0.000450855	0.000268385	0	0	0
LPC(0:0/18:3)	0	0	0	0	0	0	0	0	0	0	0.000676254	0	0.00139069	0.000105691	0	0	0	0.000314661	0	0	0	0	0	0	0	0	0	0	0	3e-05	0	0	0	0	0	0	0	0	0	0	0	0	0	0	0	0	0	0
LPC(0:0/20:3)	0	0	0	0	0	0	0	0	0	0	0	0	0	0.00159795	0.0002364	0	0	0	0	0	0	0	0	0	0	0	0	6.85e-05	0	0	0	0	0	0	0	0.00108757	0	0	0	0.00046674	0	0	0	0	0	0	0	0
LPC(0:0/20:4)	0	0	0	0	0	0	0	0	0	0	0	0	0	0.00214903	0	0.000403412	0	0	0	0	0	0	0	0	0	0	0	0.000230293	0	0	0	0	0	0	0	0.00230259	0	0	0	0.00129693	0	0	0	0	0	0	0	0
LPC(0:0/22:6)	0	0	0	0	0	0	0	0	0	0	0	0	0	0.00330721	0	0	0	0	2.42e-05	0	0	0	0	0	0	0	0	0	0	0	0	0	0	0	0	0.000489708	0	0	0	6.6e-05	0	0	0	0	0	0	0	0
LPC(14:0/0:0)	0.00106173	0	0	0	0	0	0.000516094	0.00241276	0.00202663	0	7.01e-05	0	6.43e-05	0.0579866	0.00399522	0.00330544	0	0.0017376	0.00158261	0	0	0.000108596	0.000412398	0	0	0	0.00090205	0	0.0001971	0	4.49958e-05	0.00199466	0	0	0.000264235	0.0128903	0.000908206	0	0.000629378	0.00324933	3.84e-05	0.00184315	0.000425154	6.39e-05	0.00106561	0	0	0
LPC(15:0/0:0)	0.00609112	0.00105246	0.000374812	0.000268591	0	0.00026085	0.000764807	0.00207051	0.00192867	0.000522723	0.000201386	0.000196012	0.000365125	0.0179635	0.00221771	0.00301169	0.00109226	0.00321247	0.00144716	0.000522956	0.000235695	0.000197195	0.000726618	0.00124287	0.00123244	0.000234169	0.00158019	0.000814326	0.000973375	0.00124979	0.000220158	0.00115203	0.000267317	0.000208323	0.000529022	0.00723924	0.00161885	0.000641888	0.00587515	0.00378789	0.000130709	0.00232823	0.00271923	0.000458921	0.000900372	3.01e-05	4.67e-05	3.59e-05
LPC(16:0/0:0)	0.0699305	0.0320674	0.0159873	0.0173129	0.00872114	0.00889108	0.0862004	0.114749	0.107249	0.0213235	0.0227467	0.0149189	0.0385435	0.0987565	0.123832	0.104514	0.00774851	0.111082	0.0683925	0.00971241	0.00576871	0.0459643	0.0528763	0.00605618	0.0157935	0.00455947	0.0614322	0.0332284	0.0467302	0.0290148	0.00716388	0.0681701	0.00948171	0.00429782	0.03293	0.095144	0.0599715	0.00396863	0.0540582	0.134757	0.0207808	0.0974459	0.0406508	0.0175129	0.0643987	2.38e-05	0	0
LPC(16:1/0:0)	7.57e-05	0	0	0	0	0	0	0.000313566	0.000299508	0	0	0	0	0.00414731	0.00018791	7.13e-05	0	0.000103438	0.000231787	1.51e-05	0	0	3.63e-05	0	0	0	0.000274726	0	0	0	0	0	0	0	0	0.00152319	0	0	4.57e-05	0.000513033	2.15e-05	0.000154726	0	0	0.000125498	0	0	0
LPC(17:0/0:0)	0.00125377	0.00118863	0.000204564	0.000343192	0.000274161	0.000172851	0.00354915	0.0127191	0.00992023	0.000179626	0	0	0.000218406	0.0525518	0.00640785	0.00516969	0.000188793	0.00736216	0.00372056	0.00014183	0.000127962	0.000967253	0.0019341	0	0.000400557	0.000186716	0.00110773	0.000760747	0.00137239	0.00113513	8.35823e-05	0.00122798	0.000126301	0.000171342	0.00112669	0.00910306	0.00198086	0	0.00237342	0.0122738	0.000175648	0.00267692	0.000896966	0.00035278	0.00142562	0	0	0
LPC(18:0/0:0)	0.027526	0.0295732	0.0113991	0.0152526	0.00888533	0.0050999	0.057594	0.12466	0.111721	0.00665904	0.00522287	0.0139181	0.0203491	0.162975	0.140683	0.0861354	0.0109953	0.101425	0.0682117	0.00415162	0.00190565	0.0385304	0.028604	0.00664718	0.00860086	0.0038784	0.014782	0.034943	0.0370275	0.031222	0.00321734	0.0459008	0.0053237	0.00421666	0.0227814	0.0817989	0.0426477	0.00198945	0.0473407	0.186437	0.0238983	0.0531596	0.0388448	0.0231222	0.0522709	0	0	0
LPC(18:1/0:0)	0.00313688	0.00293741	0.00436166	0.00755237	0.00120305	0.00162966	0.0133574	0.0363097	0.0190686	0.00696429	0.00753772	0.0101047	0.0210718	0.0863454	0.0147163	0.0151557	0.00168225	0.0778669	0.0125425	0.00441308	0.00618553	0.0414853	0.00509469	0.00144604	0.00392275	0.000746529	0.0164591	0.00303687	0.00558418	0.00872582	0.0023167	0.00442795	0.00097131	0.000616504	0.00386352	0.0180819	0.000761018	0.00184757	0.0128441	0.092712	0.00294774	0.0301837	0.00431323	0.00717335	0.00521013	1.83e-06	0	0
LPC(18:2/0:0)	0.0036974	0.00162192	0.0139587	0.0061976	0	0.00412051	0.0162635	0.00659047	0.00959557	0.00291887	0.0283069	0.00983366	0.0607284	0.0460171	0.00565586	0.0123628	0.00140174	0.13552	0.00583413	0.0030704	0.00417602	0.0462401	0.00272688	0.00397621	0.0108494	0.000417315	0.00961115	0.00123465	0.0119304	0.00846172	0.00733207	0.00353874	0.000869864	0.000869258	0.0380389	0.0281711	0.00198302	0.00158954	0.0100054	0.0934777	0.00118458	0.0296116	0.00334183	0.00591107	0.00245834	0	0	1.33e-05
LPC(18:3/0:0)	0.000180473	0	0.00148004	0	0	0	8.97e-05	0	0.000151856	0	0.00909188	0.00557261	0.0152399	0.00643068	0.000836425	0.000458103	0	0.0277933	0.000152346	0	0.000258419	0.00171037	0.000173038	8.57e-05	4.63e-05	0	0.00016367	0	0.000415605	0.000190026	5.08819e-05	0.000193384	0	0	0.000135205	0.00173696	0.000235066	0	0.00013099	0.00733636	0	0.00026437	0.000234278	0.000293525	0	0	0	0
LPC(20:0_0:0)	0.000393748	0	0.00184753	0.000909939	0	0	0.00161056	0.00528086	0.00414309	0.000582203	0.00203798	0.00201962	0.00392981	0.0325108	0.00876723	0.00128398	0.000263492	0.00318761	0.00115306	0.000153049	0.000217914	0.00406609	0.000717499	0.000280177	0.000701232	0	0.000547735	0.000319187	0.00118623	0.00387835	0.00218991	0.000833073	0.000126288	0.00115285	0.00457859	0.00155875	0.000385987	0	0.00069842	0.0126627	0.000942096	0	0.00143462	0.00148211	0.00051906	0	0	0
LPC(20:2_0:0)	0	0	0	0.000180869	0	0	0.00011466	0.000985285	0.000434409	0	0.000199596	0.000141709	0	0.0093319	0.000522877	0.000175895	0	0.00181797	0.000275229	0	0	0.000281701	0	0	2.95e-05	0	0.000251262	9.43e-05	0	0.000344184	0	6.99e-05	0	0	0.000143623	0.000699394	4.52e-05	0.000125583	0.000530332	0.00453857	3.91e-05	0.000299936	4.49e-05	0.00013154	0.000114965	0	0	0
LPC(20:3/0:0)	0	0	0	0	0	0	0	0.000474647	0.000401828	0	0	0	0	0.00163652	6.93e-05	0	0	0	0	0	0	0	0	0	0	0	0	0	0	0	0	0	0	0	0	0.0019134	0	0	0	0	0	0	0	0	0	0	0	0
LPC(20:4/0:0)	0	0	0	0	0	0	0	0.000468522	0.000260533	0	0	0	0	0.00502387	0.000150817	0.000764883	0	0	0.000567863	0	0	0	0	0	0	0	0	0	0.000325327	0	6.98481e-05	0	0	0	0	0.00625069	0	0	0.000160486	0.00158267	0	0	6e-05	0	0.000221066	6.65e-05	0	0
LPC(22:5_0:0)	0	0	0	0	0	0	0	0	0	0	0	0	0	0.00851299	0	0	0	0	0	0	0	0	0	0	0	0	0	0	0	0	0	0	0	0	0	0	0	0	0	0.000161066	0	0	0	0	0	0	0	0
LPC(22:6/0:0)	0	0	0	0	0	0	0	0	0	0	0	0	0	0.00675184	5.42e-05	0.000108576	0	0	0.000611987	0	0	0	3.2e-05	0	0.000396624	0.000125387	7.18e-05	4.3e-05	0	1.52e-05	0	0	0	0	0	0.00174262	0	0	0.000222394	0.000398839	0	0	0	0	7.29e-05	0	0	0
LPE(0:0/16:0)	0.000147128	0.00387409	0.000835274	0.000235052	0.000262564	0.00163252	0.00358535	0.00147436	0.000894029	0.000914684	9.51e-05	2.23e-05	0.000984108	0.00224428	0.00196586	0.00216322	0.00733911	0.00253501	0.000636681	0.00432271	1.76e-05	0.00255377	0.000541169	0.000808136	0.00119793	0.00104945	0.0034436	0.00351682	0.00114384	0.0020675	0.00207323	0.000313129	0.000740157	0.00047478	0.00214337	0.000609555	0.00258461	0.00165413	0.00218077	0.00159898	0.00152511	0.00119003	0.00277667	0.00204314	0.000473196	1.77e-06	5.97e-06	3.77e-06
LPE(0:0/18:0)	0	0	0	2.38e-05	0	8.66e-06	0	0.00026242	6.56e-05	4.57e-05	2.65e-05	1.38e-05	5.34e-05	0.000969652	4.21e-05	0	2.04e-05	0	0	8.35e-05	0	0	0	2.55e-06	0	6.46e-06	0.000186082	0	0	0	0.000141497	9e-05	0	1.59e-05	3.18e-05	0.000128776	0	1.22e-05	8.33e-05	0.00258902	0.00031335	0	0	6.52e-05	0	0	0	0
LPE(0:0/18:1)	0	0.000229782	8.91e-05	0.000124925	0	0.000190695	0.00035017	0.00112502	0.000427265	0.000244833	0.000110757	2.85e-05	0.000166815	8.83e-05	0.000185576	0.000264135	0.00056767	0.00043883	0.000411266	0.000286364	0.000580298	0.000561526	0.000114101	0	0.000171675	0	0.000835593	0.000539265	7.05e-05	0.000231528	0.000358025	8.49e-05	0	4.01e-05	0.000188292	0.000141574	4.54e-05	9.15e-05	0.000227213	0.00130984	0.000186305	0.00033832	9.53e-05	0.000106	0.000253381	0	0	0
LPE(0:0/18:2)	0	5.94e-05	6.15e-05	7.45e-05	0	0.000119082	0.000102506	0.00015551	0.000130854	0	4.44e-05	0.000151682	0.000584565	1.76e-05	0.000123344	7.45e-05	3.74e-05	0.00100594	3.19e-05	5.34e-05	9.67e-05	0.000615779	3.75e-05	0	7.82e-05	0	0.000135417	0.000107867	7.04e-05	0.000215664	0.000112882	0	0	0	0.000744541	5.4e-05	0	0	5.57e-05	0.00127857	9.38e-05	0.00014455	0.000101334	7.28e-05	8.41e-05	0	0	0
LPE(0:0/20:3)	0	0	0	0	0	0	0	6.36e-05	0	0	0	0	0	0	5.33e-05	5.43e-05	5.27e-06	0	4.32e-06	0	0	0	0	0	4.42e-06	0	0	3e-05	0	1.7e-05	0	0	0	0	0	0	0	0	0	5.89e-05	0	0	2.22e-05	0	0	0	0	0
LPE(0:0/20:4)	0	0	0	0	0	0	0	6.56e-05	1.02e-05	0	0	0	0	1.32e-05	3.9e-05	6.17e-05	0	0	9.62e-06	0	0	8.93e-06	2e-05	0	0	0	0	8.31e-05	2.44e-05	5.62e-05	2.30211e-05	0	0	0	0	3.54e-06	0	0	0	0.000198472	0	0	1.83e-05	0	0	0	0	0
LPE(16:0/0:0)	0.00917482	0.0227945	0.0143941	0.00607717	0.0242839	0.0179903	0.0289198	0.0255404	0.020763	0.0105505	0.00408706	0.00114043	0.0093412	0.0260051	0.0257348	0.0245741	0.0244117	0.0234527	0.00977262	0.0334311	0.0248901	0.0185311	0.0234006	0.00996359	0.0132902	0.0116499	0.0414342	0.0215533	0.0256641	0.0122007	0.0238004	0.00952076	0.00316195	0.00401243	0.0192295	0.00972476	0.0162882	0.0112576	0.0112896	0.020822	0.0161847	0.0223577	0.0131901	0.0105471	0.00965179	0	0	0
LPE(18:0/0:0)	0.00163007	0.00568825	0.000940813	0.000237163	0.00081344	0.000116203	0.0152357	0.0299182	0.0154673	0.0012481	0.00012176	0.000102563	0.00023637	0.0372961	0.011596	0.0152745	0.00116388	0.00632709	0.00824021	0.000958464	0.000878575	0.00232712	0.00510787	5.97e-05	0.000238146	0.000106441	0.0102183	0.00429582	0.00611266	0.00279265	0.000522956	0.000842135	2.88e-05	7.25e-05	0.000791071	0.00965647	0.00144642	0.000169972	0.016628	0.0390827	0.00147379	0.0115331	0.00332446	0.00152936	0.00784075	0	0	0
LPE(18:1/0:0)	0.000995419	0.00718988	0.00293818	0.00334603	0.00247095	0.00227643	0.00735025	0.0142911	0.00754	0.00366148	0.00129638	0.000367282	0.00298305	0.00818802	0.00327489	0.0045432	0.00670048	0.0116	0.00771797	0.00952902	0.010425	0.00759178	0.00458828	0.00112331	0.00463729	0.000798079	0.0305662	0.0122186	0.00161911	0.00544828	0.00810948	0.00627648	0.000548221	0.000385674	0.00782997	0.00217133	0.00176222	0.00175325	0.00233692	0.0207757	0.00180893	0.00778561	0.00595595	0.00565429	0.00186411	0	0	0
LPE(18:2/0:0)	0.000156067	0.000519648	0.00168043	0.00119035	0.000448114	0.00115872	0.00714441	0.00310716	0.00365324	0.000455227	0.00066578	0.000240562	0.0104901	0.000967906	0.000888486	0.00175021	0.00110833	0.0260159	0.00236446	0.00134827	0.00152203	0.0104748	0.000523149	0.000349795	0.00175496	0.000262358	0.00378173	0.000853456	0.00138186	0.00152634	0.00457767	0.000730515	0.000178633	0.000267691	0.0156877	0.00182169	0.000491005	0.000807592	0.00168719	0.0114422	0.000392285	0.0056054	0.00113459	0.00122635	0.000285259	0	0	0
LPE(20:3_0:0)	0	5.59e-05	5.68e-06	0	0	0	1.63e-05	0.000317924	9.94e-05	0	0	0	0	2.08e-05	0.000401572	3.77e-05	1.82e-05	0	4.59e-05	3.23e-05	3.39e-05	2.5e-05	0	0	1.14e-05	0	2.63e-05	0.000190311	2.41e-05	2.63e-05	1.68734e-05	0	0	0	1.46e-05	8.35e-06	4.52e-05	4.42e-05	3.4e-06	2.78e-05	0	0	0.000214858	0.000112631	0	0	0	0
LPE(20:4/0:0)	0	5.15e-05	1.22e-05	0	0	0	1.51e-05	0.000176578	8.23e-05	0	0	0	0	0	0	0.000142792	1.58e-05	0	9.78e-05	0	0	2.32e-05	2.15e-05	0	4.84e-06	0	5.48e-05	3.32e-05	8.14e-05	5.47e-05	3.54473e-05	0	1.18e-05	7.41e-06	1.24e-05	4.95e-05	3.1e-05	0	0	0.000743188	1.77e-05	0	9.71e-05	4.66e-05	0	0	0	0
LPE(O-16:1/0:0)	0.0111562	0.0145181	0.00139711	0.00345652	0.00490933	0.00265184	0.0193613	0.0244408	0.017968	0.00194765	0.000376057	0	0.000625375	0.0152095	0.0132651	0.00438277	0.00242973	0.00187482	0.00389519	0.0211379	0.00895651	0.00351638	0.0260541	0.0038302	0.0119931	0.00257289	0.0450444	0.0234961	0.00369675	0.0101643	0.00451102	0.0113515	0.00200915	0.00226844	0.00990238	0.0077471	0.00654026	0.00215868	0.0153092	0.0355384	0.00339499	0.00243039	0.00686777	0.0119588	0.00184295	0	0	0
LPE(O-18:1_0:0)	0.00294179	0.0209267	0.00138844	0.0122193	0.0181948	0.00530719	0.0254746	0.0479945	0.0291696	0.00339688	0.000598012	0.00109193	0.00392881	0.0323759	0.0241499	0.0238133	0.00938741	0.00862143	0.0125494	0.0025848	0.00170253	0.00378012	0.0199749	0.00260231	0.0105827	0.00353943	0.025414	0.00979594	0.0131183	0.0161349	0.00618346	0.00276904	0.00667522	0.0090476	0.00670668	0.00529912	0.00613837	0.000620154	0.0235199	0.0349544	0.00433022	0.00620705	0.00891353	0.00879205	0.00989889	0	0	0
LPE(O-18:2_0:0)	0.000983267	0.00328555	0.000169026	0.000459113	0.000768519	0.000366586	0.00267153	0.00638323	0.00291477	0.000180307	9.29e-05	0	0.000203528	0.00318115	0.00253559	0.000944502	0.00086492	0.00106008	0.000817652	0.00184195	0.00101746	0.00038324	0.00473499	0.000330361	0.00115843	0.000251969	0.0118447	0.00445859	0.0014496	0.00297686	0.000581448	0.00354883	0.000296093	0.000242281	0.00177202	0.000840296	0.000615077	0.000112104	0.00297556	0.0152862	0.000868899	0.000407023	0.00137457	0.0036445	0.000155617	0	0	0
LPG(0:0_16:0)	0.00412405	0.0120519	0.00887821	0.00169527	0.000368684	0.00115484	0.00215651	0.0094093	0.00618347	0.00328282	0.00104591	0.000588856	0.00276003	0.0380437	0.00649577	0.0141232	0.00379534	0.0123297	0.00243113	0.00052112	0.00200886	0.00358478	0.0028538	0.000678939	0.00302754	0.000303854	0.0130153	0.00413021	0.00551004	0.00709295	0.00241424	0.00136205	0.000507192	0.000807569	0.00517791	0.00828166	0.00219564	0.00135307	0.00270479	0.00773103	0.000250273	0.00630574	0.00826616	0.00426303	0.00396989	0	0	0
LPG(0:0_18:0)	0.00200928	0.0032143	0.00176972	0.000707305	0.0004095	0.000547087	0.000432513	0.00286036	0.00146129	0.00019863	0.000297462	0.000192752	0.000771823	0.00495099	0.0031416	0.00128081	0.00116972	0.00272268	0.000779802	0.000337192	0.00100433	0.000771805	0.000361556	0.000437827	0.00158333	0.000357959	0.00130184	0.000581828	0.00302134	0.00251676	0.00122734	0.000555737	0.000362638	0.000560241	0.00116993	0.000841686	0.00107471	0.000676383	0.00104336	0.00295102	0.000215216	0.000635818	0.00347627	0.00166012	0.000280716	0	0	0
LPG(0:0_18:1)	0.00189041	0.00643525	0.00327179	0.00205493	0.000440976	0.00177747	0.000859073	0.00456804	0.00181732	0.00155174	0.00082147	0.00029467	0.00131221	0.00969845	0.00567275	0.00310221	0.0030944	0.00355485	0.00334116	0.000903363	0.00352984	0.00487323	0.000365667	0.000832891	0.00524587	0.000421561	0.0064066	0.0028513	0.0155175	0.0130236	0.00254942	0.000710268	0.00045583	0.000736166	0.00186641	0.00378265	0.00108999	0.00110722	0.000738936	0.00386219	0.000241052	0.00158193	0.00773995	0.00204264	0.000878153	0	0	0
LPI(0:0/18:0)	0.000210241	0	9.71e-06	0.000327719	1.15727e-06	0	0	0.00284712	0.000294701	4.43e-05	3.69e-05	5.91e-05	0.0001006	0.00496929	0.000257624	0.000226592	0	0	0.00106856	0	1.77e-05	0.000111294	0.000443769	0	1.52e-05	0	0.000430227	0.000224429	4.39e-05	4.11e-05	0	3.25e-05	0	2.99e-05	6.94e-05	2.89e-05	1.01e-05	0	8.27e-05	4.27e-05	8.97e-06	0.000309455	0.000178378	5.2e-05	0.000161197	0	0	0
LPI(0:0_16:0)	0.000282708	9.66e-05	0.000551336	0.000112431	0	0	0.000790178	0.00064057	0.000874277	0.00017783	0.00119172	0.00147837	0.00204324	0.0100938	0.000826994	0.000810486	0	0.00274672	0.00135747	0	8.14e-05	0.00197118	0.000391399	2.51e-05	0.000942074	0	0.00110065	0.000304896	0.000265088	0.000972465	0.000207079	0	0	0.000460148	0.00110281	0.000525931	0.000128782	7.01e-05	2.34e-05	0.000344144	0	0.00229003	0.00113797	0.000838387	0.000172104	0	0	0
LPI(0:0_18:1)	0	0	0	2.72e-05	0	0	0.000111661	0.000233513	0.000139106	7.8e-05	0.000181695	0.000674929	0.000598848	0.0016762	0.000129471	0.000101917	0	0.000228213	0.000195037	0	0	0.000510964	3.22e-05	0	0.000122884	0	0.000203414	8.93e-05	0	0.000119671	0	0	0	0	8.33e-05	0.000100037	0	0	0	5.83e-05	3.55e-05	0.000371271	0.000101924	0.000150039	2.55e-05	0	0	0
LPI(18:0/0:0)	0.0025278	0.000827352	0.000515025	0.00371847	3.92587e-05	4.52e-05	0.0017551	0.00659216	0.00679025	0.000213269	0.00064246	0.000832063	0.00139596	0.0355681	0.00902155	0.00263279	9.24e-05	0.00118777	0.00650071	3.54e-05	0.000212114	0.00115619	0.00417128	0.000125261	0.000366171	0	0.00288517	0.00157232	0.00192025	0.000937102	0.000238202	0	2.96e-05	0.000318745	0.000677246	0.00280792	0.000226353	5.26e-05	0.000610473	0.00308811	8.24e-05	0.00279053	0.00500688	0.00218595	0.00107194	0	0	0
MGDG(39:1)a	0.0123933	0.011714	0.000363601	0.00670084	0.00494099	0.00330176	0.0202966	0.0252451	0.0255625	0.00795066	0.00402933	0.00148767	0.00111676	0.0125576	0.0101762	0.00433011	0.00238096	0.0130511	0.0109945	0.000293267	0.00183462	0.00167896	0.0100808	0.00042084	0.00171461	0.000225228	0.00743475	0.00599566	0.00715447	0.00343472	0.00109884	0.012321	0.00258744	0.00121181	0.00262486	0.00961949	0.0110279	0	0.0091804	0.0031435	0.000865851	0.0110058	0.00663338	0.00322983	0.011515	0	0	0
MGDG(39:1)b	0.0111288	0.00479533	0.00207277	0.00343524	0.0124125	0.0077169	0.0078563	0	0.00141378	0.00780099	0.00478393	0.0013018	0.0019065	0.020835	0.00537727	0.0875089	0.00455419	0.00670789	0.0121567	0.00473193	0.00831438	0.00555807	0.0175945	0.00124676	0.00187269	0.000262545	0.0114656	0.0167798	0.0152175	0.00704887	0.00253299	0.04945	0.00747778	0.0287574	0.00804879	0.00519182	0.00506955	0.00136925	0.00707976	0.0104105	0.00437902	0.00658916	0.00878094	0.00290195	0.00938541	0	0	0
PC(14:0_16:0)	0.00455219	0.00106997	0.000432372	0.000451727	0.000897029	0.00103603	0.00395936	0.0246038	0.0166662	0	0	0	0.000148539	0.0942763	0.0591828	0.0100756	0.000710205	0.00862006	0.00548663	0.00169735	0.00102695	0.000617121	0.00070303	0.000663119	0.000595114	0	0.00615868	0.00166104	0.0128957	0.0018521	0.00076795	0.0034969	0.000501442	0.000743891	0.000846039	0.022203	0.0076087	0.00138121	0.00170296	0.00402503	0.00191441	0.00277872	0.00898223	0.000708295	0.00738989	0	0	0
PC(14:0_20:4)	0	0.000230309	2.63e-05	0	0	2.03e-05	0	0	0	0	0	0	0	0.000331681	0.00041078	0	1.98e-05	3.87e-05	0	3.49e-05	0.000334327	0.000144859	0	1.37e-05	2.16e-05	0.000193664	5.6e-05	0	0	0	3.19156e-05	0	0	0	4.73e-05	0	0	0	0	0	0	0	0	0	0	0	0	0
PC(15:0_18:1);PC(16:0_17:1)	0	0	0	0	0	0	0	0	0	0	0	0	0	0	0	0	0	0	0	0	0	0	0	0	0	0	0	0	0	0	0	0	0	0	0	0.00022962	0	0	0	0.000116937	0	0	0	0	0	0	0	0
PC(15:0_18:2)	0	0.000236641	0.00024902	0	0	0.000346392	0.0034226	0.00220441	0.000715327	0	0.000679766	0.000124078	0.000812111	0.00119198	0.000535866	7.04e-05	7.35e-05	0.00921722	0.000143814	0	0.000193607	0.000518975	0	0	0.000314207	0	0.000378087	9.02e-05	0.00024853	0.00027518	0.000876422	0	6.17e-05	7.62e-05	0.00315202	0.01636	0.000141771	0	0	0.000512781	0.00212049	0.000103395	0	2.64e-05	0.000383518	0	0	0
PC(16:0/16:0)	0.0576024	0.0199864	0.00832078	0.00765952	0.0104484	0.00834139	0.0286982	0.0782134	0.0719091	0.00234874	0.00698125	0.00682267	0.00702817	0.0949727	0.122746	0.03361	0.00407455	0.030083	0.0306715	0.00711966	0.00485475	0.00483822	0.00918479	0.00544651	0.00412459	0.00179557	0.0257389	0.0204177	0.0614529	0.0229852	0.00270738	0.0160236	0.00540142	0.00478203	0.0043221	0.0376784	0.0459367	0.00532631	0.0217316	0.0495134	0.0127874	0.0360703	0.0570874	0.0125882	0.0222687	0	0	0
PC(16:0_16:1)	5.86e-05	0	0	0	0	0	0.00010038	0.00072261	0.000329225	0	0	0	0	0.0140984	0.00105374	0.000197932	0	0.000241128	0.000200774	0.000528531	0	0	0	0	0	0	0.000297739	0	0	0	0	0	0	0	0	0.00571085	5.8e-05	0	0	0.000730632	0.000510261	0	0	0	0.000686567	0	0	0
PC(16:0_18:0)	0.00304388	0.00181536	0.00146681	0.00175992	0.00124077	0.00148921	0.00828657	0.0294055	0.0209548	0.000692088	0.00156537	0.00232414	0.00361005	0.103266	0.0403128	0.00839952	0.000608514	0.00712224	0.00631735	0.00138585	0.00135471	0.00136792	0.000868169	0.00123347	0.000424603	0.000310986	0.00507895	0.00542981	0.00982503	0.00519635	0.000866207	0.0027773	0.000899075	0.00105427	0.000857008	0.0184326	0.00450364	0.000811869	0.00628506	0.0176947	0.00508483	0.00230265	0.0113902	0.00222138	0.00515436	0	0	0
PC(16:0_18:1)	0.0205239	0.0632119	0.03177	0.0146825	0.0467769	0.0382005	0.119715	0.183941	0.123073	0.00913732	0.0369828	0.0260148	0.0454876	0.327522	0.199775	0.0559342	0.0336216	0.137714	0.054448	0.0320458	0.0681866	0.0448813	0.012363	0.0293956	0.0180792	0.0198588	0.0459858	0.0321671	0.0919313	0.0583838	0.044968	0.0229139	0.0227056	0.0179079	0.0223699	0.199761	0.0220963	0.0391227	0.00693464	0.141547	0.154631	0.0238268	0.034466	0.00618365	0.0901436	0	0	0
PC(16:0_18:2)	0.0030548	0.0160167	0.040648	0.00681436	0.0124703	0.0338629	0.0735598	0.0470373	0.0261193	0.00955496	0.0773003	0.0354155	0.0872256	0.100401	0.0519822	0.0140288	0.00613873	0.119479	0.00730796	0.00952769	0.0288886	0.0427331	0.00553398	0.0107212	0.00915759	0.00403366	0.0108926	0.00670584	0.0237167	0.0160847	0.0628776	0.00946215	0.00745743	0.00936926	0.134051	0.181379	0.00894088	0.00646607	0.00169389	0.0666618	0.0942267	0.0135854	0.00314869	0.00320252	0.0483734	0	0	0
PC(16:0_18:3)	0.000215624	0	0	0	0	0	0.000179158	0.0011098	0.000295727	0	0	0	0.000121262	0.000231784	0.00144559	0.00311548	0	0.000200796	0.000512384	0.000182887	0	0.000103784	0	7.48e-05	0	0	0.000339413	0.000277022	0.000363581	0.000279926	0	0.00023851	0	0	0	0.000241109	0.000132753	0.000113161	0.00125274	0.00171606	0.000117149	0.000182591	0.000243375	0	0.000390321	0	0	0
PC(16:0_18:3)a	0	0	2.63e-05	7.34e-05	0	0.000247227	9.85e-05	4.75e-05	0	0	0.00558323	0.0013871	0.00598584	0.000394842	0.000140973	0	0	0.00124788	0	6.9e-05	0.000186618	0.000181719	0	1.6e-05	0	1.91e-05	5.19e-05	0	0	0.000175183	4.98354e-05	0	0	0	6.49e-05	0.00118348	0	0	0	8e-05	0.000262135	6.78e-05	0	2.52e-05	5.55e-05	0	0	0
PC(16:0_18:3)b;PC(16:1_18:2)	0	0	0	1.51e-05	0	0	0.00143257	0.000297131	0	0	0	0	0	0.00162369	0.000213669	0	0	0.000142959	0.00014551	0	0.000196053	0	0.000108928	0	0	0	0.000183738	0	0	0	0	0	0	0	0	0.00155805	4.87e-05	0	0	0	0.000731694	0	0	0	0.000294432	0	0	0
PC(16:0_20:4)	0	9.57e-05	0	9.21e-05	0.00015623	0.000190726	0.000105241	0.00123264	0.000681973	0.000494305	0.00109375	0.000356498	0.000286019	0.00292681	0.000422385	0.000624083	0	0.000159701	0.000315641	9.08e-05	0.000214278	0.000474411	0.000154643	7.77e-05	0	3.77e-05	0	0	0	0.000111148	6.67089e-05	0.00024024	0.000136826	0.000107878	0.000338817	0.0145274	7.1e-05	4.29e-05	4.59e-05	0.00398994	0.00301014	0.000292453	0.000113593	4.88e-05	0.00164649	0	0	0
PC(16:0_20:4);PC(18:1_18:3)	0	0	6.72e-05	0	0.000504328	0.000218893	0.00143967	0.00433901	0.00114826	4.53e-05	0.00017842	0.000152881	0.00119022	0.00484412	0.0025704	0.00513221	0.000609807	0.00132489	0.000952261	0.00108624	0.000762495	0.00126002	5.48e-05	0.000368873	8.16e-05	0.000214102	0.000523374	0.000411591	0.00102556	0.000814227	0.000325109	0.000339104	0	5.75e-05	3.74e-05	0.00215506	4.72e-05	0.00137927	0.000300079	0.00681087	0.0030318	0	0	0	0.00219125	0	0	0
PC(16:0_20:5)	0	0	0	0	0	0	0	0	0	0	0.000410304	0	0	0	0	0	0	0	0	0	0	0	0	0	0	0.000105932	0.000399435	0	0	0	0	0.000106241	0	0	0	0.000836487	0	0	0	0	0.000347935	0	0	0	0	0	0	0
PC(16:0_20:5);PC(16:1_20:4)	0	0	0	0	0	0	0	0	0	0	2.7e-05	0	0	0	0	0	6.63e-05	0	0	0	0	0	0	0	0	0	0	0	0	0	0	0	0	0	0	2.61e-05	0	0	0	0	5.09e-05	0	0	0	0	0	0	0
PC(16:0_20:5);PC(18:2_18:3)	0	0	0.000162069	0	0.000283244	0.000381502	0.000725597	0.000469315	0	0.000433137	0.00157849	0.000888361	0.00248693	0.00120171	0.000213756	0.000648006	0	0.000927251	0.000132463	0.000217987	0	0.000727241	0	0	0	0	0	6.3e-05	0	5.17e-05	0.000432713	0.000114749	0	8.39e-05	0.00168852	0.00301942	0	0	0	0.00213509	0.00135456	0	0	0	0.00133019	0	0	0
PC(16:0_22:4)	0	0	0	0	0	0	0	0	0	0	0	0	0	0.00143604	7.92e-05	0	0	0	0	0	0	0	0	0	0	0	0	0	0	0	0	0	0	0	0	0.000193896	0	0	0	0.0011575	0.000299607	0	0	0	0	0	0	0
PC(16:0_22:5);PC(18:0_20:5);PC(18:1_20:4)	0.000127211	0.00054892	7.67e-05	0.000187259	0.000237861	0.000268113	0.000281228	0.00725791	0.00471872	0.000282265	0.000583312	0.000372427	0.00025149	0.00530679	0.0024817	0.000331337	0.00021544	0.000412739	0.00038573	0	0.000395442	0.000359544	0	0.000529449	0.000229542	0.000788711	0.000392478	0.000322631	0.000257432	0.000958395	0.000231792	0	0.000232026	0.000107932	0.000141409	0.00539442	0.000195389	0	0.000134209	0.00729565	0.0114227	0.000187049	0.00091166	0.000237788	0.000820624	0	0	0
PC(16:0_22:5);PC(18:1_20:4)	0	0	0	0	0	0	0	0.000135316	0	0	0.000727951	0	0	0.000536647	0	4.78e-05	0	0	0	5.77e-05	0	0	0	0	0	4.14e-05	0	0	0	0	0	0	0	0	0	0.000847981	0	0	0	0.000800477	0.000535809	0	0	0	0	0	0	0
PC(16:0_22:6)	0	0	0	0	0	8.04e-05	0	0	3.94e-05	0.000290406	0.000622256	0.000194426	0.000292288	0.00513441	0.000224635	0	0	0	0.000155966	0	0.000135157	0.000188033	0	4.2e-05	0	0.000306166	0.000129053	0.000141733	0	3.12e-05	0	0	0	0	0	0.00256501	0	0	0	0.000100746	0.000854806	0	0	0	0.000269843	0	0	0
PC(17:0_18:2)a	0	0	0	3.39e-05	0.000197223	0.000245828	0.000336315	0.0027446	0.000786742	0	0.00184396	0.0005151	0.00212618	0.000685408	0.0001806	0	5.5e-05	0.00128813	0	0.000203212	0.00114738	0	0	0	0	0	0	0.000200123	0.000743913	0.000218302	0.00130473	0	0	0	0.0122802	0.0113312	6.92e-05	0	0	0.000208284	0.00112429	0	0	0	0.000499466	0	0	0
PC(17:0_18:2)b	0	0.000739155	0.000219133	0.000112777	0.000197223	0.000133319	0.00105433	0.00250471	0.00184178	0.000160466	0.000494038	0.000215124	0.000477708	0.00261672	0.000756605	0.00019044	0.000171897	0.00229104	0.00017175	0.000346816	0	0.000563455	0.000119859	9.04e-05	9.13e-05	4.81e-05	0.0035826	0	0.000743913	0.000511243	0.000274644	0.000167789	0	0	0.0039669	0.00862386	9.67e-05	0	0	0.000913108	0.00122735	0	0	3.11e-05	0.000410094	0	0	0
PC(17:0_22:6)	0	0	0	0	0	0	0	0	0	0	0	0	0	0.000117329	0	0	0	0	0	0	0	0	0	0	0	1.79e-05	0	0	0	0	0	0	0	0	0	0	0	0	0	0	3.95e-05	0	0	0	0	0	0	0
PC(18:0_18:1)	0.001525	0.0139044	0.00543412	0.00471707	0.0079123	0.00663608	0.0247657	0.124632	0.0656431	0.00295143	0.00568657	0.00476134	0.0163887	0.23999	0.0521113	0.0102456	0.00831734	0.0142268	0.00916185	0.00446173	0.0138849	0.00967726	0.00159958	0.00678184	0.00295728	0.00513925	0.00687723	0.00655776	0.00914046	0.0164956	0.014366	0.00465208	0.00422685	0.00514261	0.011211	0.0555263	0.00388057	0.0166281	0.00320582	0.0360244	0.0375916	0.00103148	0.00480932	0.000828779	0.0238453	0	0	0
PC(18:0_18:2)	0	0.00828522	0.0149865	0.00195539	0.00356665	0.00359807	0.0444657	0.0164723	0.00756199	0.00128087	0.0201006	0.0108077	0.035314	0.0659482	0.0104785	0.00495104	0.00196012	0.0122591	0.000975927	0.00239973	0.0102245	0.00968719	0.000858417	0.00375578	0.00336592	0.00198015	0.00196598	0.0010057	0.0043217	0.00932998	0.021911	0.0025086	0.00234299	0.00215491	0.0704185	0.0250483	0.00104144	0.00438338	0.000126556	0.0261283	0.0339519	0.000709829	0.000985907	0.000412648	0.0118564	0	0	0
PC(18:0_20:3)	0	0.000390196	9.01e-05	5.54e-05	0	0.000255923	0.000454389	0.00999584	0.00674445	0	0.00316044	0.00175646	0.00462116	0.0216749	0.0050431	0.000233566	6.78e-05	0.00025456	0.000100013	0	0	0	0	0.000313972	0.000111765	6.3e-05	0.000264025	0	8.48e-05	0.000561362	0.000139234	0	9.47e-05	6.49e-05	7.05e-05	0.0168291	0	7.9e-05	0	0.00490432	0.00701623	0	0.000117216	0	0.00141919	0	0	0
PC(18:0_20:4)	0	0.000184179	0	0	0.000276816	7.92e-05	0.000491343	0.00431997	0.00129125	5.93e-05	0	0	0.000305487	0.00302478	0.00180734	0.000582115	0.000108006	0.000260692	0.000236785	8.12e-05	0.000159883	0.000203693	0	0	0	0	0	0	0	0.000319143	0.00011903	0	0.00010336	5.97e-05	0.00012498	0.00129979	0	0.000151795	0.000126954	0.000847369	0.000718235	0	0	0	0.000719092	0	0	0
PC(18:0_20:4)a	0	0	0	0	0	0	0	0	0	0	0	0	0	0.00144379	7.92e-05	0	0	0	0	0	0	0	0	0	0	0	0	0	0	0	0	0	0	0	0	0.000193896	0	0	0	0.00111087	0.000299607	0	0	0	0	0	0	0
PC(18:0_20:4)b	0	0	0	0	3.61579e-05	1.17e-05	0	0.000229125	5.2e-05	0.000150472	0.000110757	3.38e-05	2.56e-05	0.000638398	2.83e-05	2.98e-05	0	1.57e-05	6.07e-05	1.9e-05	5.37e-05	0.000107138	0	0	0	0	3.36e-05	2.15e-05	0	2.28e-05	0	0	1.47e-05	0	6.69e-06	0.000462202	0	0	0	0.00124513	0.000335412	0	0	0	0.000119824	0	0	0
PC(18:0_22:4)	0	0	0	0	0	0	0	0	0	0	0	0	0	0.00100599	0	0	0	0	0	0	0	0	0	0	0	0	0	0	0	0	0	0	0	0	0	0	0	0	0	0.000523718	0.000155124	0	0	0	0	0	0	0
PC(18:0_22:5)a	0	0	0	0	0	0	0	0.000147769	0.000132592	0	0	0	0	0.0382388	0.000191601	0	0	0	0	0	0.000119221	0.000159855	0	0	0	0	0	0	0	0	2.31519e-05	0	7.8e-05	0	0	0.00279553	0	0	0	0.000279368	0.0011457	0	0	0	0.000352645	0	0	0
PC(18:0_22:5)b	0	0	0	0	0	0	0	0.000212636	0.000192899	0	0	0	3.05e-05	0.000951271	0	0	0	8.09e-05	2.94e-05	0	0	0	0	0	0	0.000129795	0	0	0.000107597	9.34e-05	2.69451e-05	0	0	0	0	0.000371199	0	0	0	0.000550941	0.000576638	0	0	0	4.4e-05	0	0	0
PC(18:0_22:6)	0	0	0	0	0	0	0	0	0	0	0	0	0	0.00272308	0	0	0	0	0	0	0.000283582	0.000243444	0	0	0.000202795	6.58e-05	0	0	0	0	0	0	0	0	0	0.00245062	0	0	0	8.08e-05	9.33e-05	0	0	0	0	0	0	0
PC(18:1/18:1)	0.00070848	0.0115663	0.0103456	0.00218489	0.00636446	0.00829509	0.0444657	0.0392603	0.0229694	0.00679271	0.0161791	0.0127412	0.0227078	0.0321451	0.0218012	0.00575256	0.0159085	0.0597093	0.00260803	0.00701453	0.0580292	0.0218799	0.00129215	0.0100348	0.0041204	0.00580853	0.00242763	0.00373931	0.00790045	0.00896326	0.0168003	0.00385675	0.00220343	0.00523756	0.0117702	0.0693831	0.00284552	0.0212339	0.000579403	0.024591	0.00809875	0.00596935	0.000618674	0.00160026	0.0103407	0	0	0
PC(18:1_18:2)	0.000711714	0.00582962	0.026759	0.00220244	0.00285304	0.0131949	0.0680085	0.0247801	0.014234	0.00711719	0.0340255	0.0143214	0.0440115	0.000535776	0.00357041	0.0078485	0.0057837	0.141564	0.00155557	0.00614165	0.0356743	0.0582168	0.00184804	0.0054095	0.00577418	0.00223758	0.00438645	0.003402	0.0123458	0.00681258	0.0454148	0.00436942	0.00129811	0.00397382	0.0174232	0.0018698	0.00145314	0.00883033	0.00123923	0.0345262	0.0169279	0.0161209	0.00128279	0.00194778	0.00781314	0	0	0
PC(18:1_18:2);PC(18:0_18:3);PC(16:0_20:3)	0	0.000132903	0.000568965	0.000129781	0.000171611	0.000734376	0.0125451	0.00260497	0.00125626	0.00117834	0.00521681	0.00201614	0.00750911	0.00593872	0.00129533	0.000813762	8.1e-05	0.00904402	0.000268225	0.000362314	0.0017147	0.00490395	0	0.000184498	0.000148889	0	0.000807021	0.000312704	0.000917201	0	0.00198141	0.000218004	0	0.000247697	0.00135344	0.00560795	0	0.00012078	0.000109323	0.00281249	0.00216741	0.00163161	0.000110609	4.72e-05	0.00158824	0	0	0
PC(18:1_20:3);PC(16:0_22:4)	0.000178161	0.00262304	0.000458754	0.000441976	0.000808608	0.00104293	0.000444143	0.00377495	0.00295741	0.000328806	0.00163798	0.00117377	0.0008567	0.00412703	0.00060928	0.000675935	0.000569273	0.0011255	0.00140525	0.000478045	0.00230564	0.00214021	0.000380739	0.00195929	0.000702102	0.000849482	0.000382002	0.000779304	0.000372011	0.00250948	0.000687061	0.000168837	0.00104847	0.000242205	0.000387652	0.00880277	0.000308174	0.00046905	0	0.0089437	0.00982657	0.000519714	0.00100506	0.000211021	0.00292264	0.000844503	0	0
PC(18:1_22:6)	0	0	0	0	0	0	0	0.00102686	0.000857951	0	0.000156763	0	0	0.0002787	0	0	0	0	0	0.000421937	0.000186392	0	4.89e-05	0	0.000320743	0.00212845	0.000555228	0.000268764	0	5.81e-05	0.000155794	0	0	0	3.45e-05	0.000544905	0	0	0	0.000171537	0.00101409	0	0	0	0	0	0	0
PC(18:2/18:2)	0.00115037	0.00381592	0.0538135	0.00330921	0.00228912	0.0420302	0.109327	0.0117351	0.00858141	0.00132909	0.0853842	0.0293353	0.102201	0.000890027	0.00287152	0.00333945	0.00448629	0.22663	0.00153562	0.00419298	0.0134144	0.0664287	0.00101782	0.00504623	0.0139639	0.00115616	0.0036493	0.00209833	0.0198874	0.0106447	0.0749001	0.00435164	0.00142041	0.00294677	0.128751	0.00898431	0.00137653	0.00431088	0.00542392	0.0270679	0.0137304	0.0230295	0.00107007	0.00605972	0.0037945	0	0	0
PC(18:2_18:3)	0	0	7.13e-05	0.000326503	7.65428e-05	0.000450768	0.000158059	0	2.55e-05	0	0.00858748	0.0014056	0.0099566	0	0	5.63e-05	0	0.00470586	0	0	0.000276114	0.000341084	0	0	0	0	0	0	0	4.92e-05	8.17511e-05	0	0	0	0.000163983	4.8e-05	0	0	4.65e-05	0.00012491	0.000123638	0.000142041	0	0	0	0	0	0
PC(18:2_20:4)	0	0.000670146	6.7e-05	0.000199362	0.000620522	0.00108385	0.000125995	0.00226358	0.0018132	0.00206501	0.00423999	0.0018391	0.00247895	0.0634913	0.00652387	0.000377543	0.000330431	0.000762416	0.00179137	0.000269758	0.00241528	0.00225576	0.000238208	0.00105593	0.00172177	0.00755889	0.000986293	0.00208949	0.000273144	0.00110494	0.000279215	9.53e-05	0.000486966	0.000138201	0.000206586	0.0507342	0	0.00035083	0	0.00205989	0.0176419	0	0.00015839	0	0.00356104	0	0	0
PC(28:0)	0	0	0	0	0	0	0	0	0	0	0	0	0	0.00707749	0.00269149	0.000520565	0	0	0.000398184	0	0.000245968	0	0	0	0	0	0.000335437	0	0.000560428	0	0	0	0	0	0	0.00209757	0.00034	0	0	0	0	0	0.00112625	0	0.000525189	0	0	0
PC(32:1)	0.00906274	0	0	0.00044408	0	0	0.0281475	0.00871493	0.0236416	0.00121785	0	0	0	0.0123834	0.000946722	0.0305405	0.0106855	0.00321166	0.000600288	0	0	0	0.0167296	0	0	0	0.0216052	0.00483079	0	0.000657936	0	0.00397388	0	0	0	0.0117281	0	0	0.00901751	0.00060613	0.00126508	0.00806907	0	0	0.0157938	0	0	0
PC(36:0)	9.37e-05	0.000143852	0.000131954	9.34e-05	0	9.83e-05	0.00042596	0.00331676	0.00172172	0	0.000117852	0.000143665	0.000324678	0.0257512	0.00215746	0.000331966	0	0.000672494	0.000261753	0	6.02e-05	7.13e-05	0	6.65e-05	0	0	0.000365994	0.000243131	0.000564045	0.000324411	6.2654e-05	0.0001837	4.76e-05	5.91e-05	7.38e-05	0.00107832	0.000197534	0	0.000321631	0.000656264	0.000107597	0	0.00058838	0.000237099	0.000326861	0	0	0
PC(37:4)	0	7.23e-05	0	0	0	0	0	0.000569038	0.00024368	0	0	0	0	0.000151307	3.34e-05	0	0	0	2.62e-05	0	0	0	0	0	0	0.000130865	0	0	0	0.000105466	0	0	5.92e-05	0	0	0.00166607	0	0	0	9.63e-05	0.000328392	0	0	0	5.47e-05	0	0	0
PC(37:5)a	0.000218933	0	4.91e-05	0.000247577	0	0.000482241	0.0014361	0	0	0	0.000901479	0	0.000294773	6.63e-05	0.000180671	0.00165149	0.000168349	0.00157459	0.000271393	0.000132476	0.000359184	0.00180491	0.000245223	8.37e-05	6.49e-05	0	0.00218336	0.000121421	0.000536046	0.000622149	0.00023318	0.000123669	0.000302796	0.000424894	0.00393511	0	0	0	0	0.00437876	0.000582011	0.000473983	0.00110118	0.000192226	4.65e-05	0	0	0
PC(38:1)	0	0	0.000201774	0	0.000833233	0.000960077	0.000671604	0.0016709	0.000427107	0	0.000241505	0.000143369	0.000721154	0.019026	0.00112383	0	0.000335043	0.000446762	0.00013307	0	0.00078049	0.000437947	0	0.000127277	0.000409929	0.000121269	0	0	0.000418081	0.000958349	0.00084619	0	0	5.29e-05	0.000929895	0.000861867	0	0.000749629	0	0.000520218	0.000828081	0	0.000359723	7.17e-05	0.000148045	0	0	0
PC(38:2)	0	0	0	0	0	0	0	0.00371951	0.00149915	0	0.000735967	0	0.000653964	0.00101311	0.000210761	0	0	0.00229269	0	0	0.000221736	0.000427545	0	0	0	0	0.00027539	0.000156542	0	0.000370225	0.000179674	0	0	0	0.00918289	0.000146888	0	0	0	0.000291263	0.00028045	0	0.00021587	0	9.07e-05	0	0	0
PC(38:5)	0	0	0	0	0	0	0	0	0	0	0	0	0	0.000537953	0	0	0	0	0	0	0	0	0	0	0	0	0	0	0	0	0	0	0	0	0	0.00046969	0	0	0	0.000803637	0.000563359	0	0	0	0	0	0	0
PC(38:7)a	0	0	0	0	0	0	0	0	0	0	0.000236526	0	0	0	0	0	0	0	0	0	0.000115204	0	0	0	8.08e-05	0.000103773	0	0.000109857	0	0	5.24515e-05	0	0	0	0	0.000165135	0	0	0	0	8.71e-05	0	0	0	0	0	0	0
PC(40:6)	0	0.000166905	0	0.00010574	0.000115238	0.000109159	0	0.00053067	0.000435742	0.000194145	0	0	0	0.0316033	0.000932584	0	5.34e-05	0.000171744	0.00046422	0	0.000961247	0.000567185	0	0.000133865	0.000233846	0.00133165	0.000273311	0.000110993	0	0.000249282	3.78017e-05	0	7.49e-05	4.3e-05	5.77e-05	0.0102759	0	0	0	0.000446395	0.00179207	0	0	0	0.00090553	0	0	0
PC(O-16:0/16:0)	7.94e-05	0.000201397	0	0.000355197	0	0	0.000977166	0.00538577	0.00205843	0	0	0	0	0.00625682	0.00235876	0.000869042	0	0.000377238	0.000918829	0	0	0.000424079	0.000108318	0.000172089	0	0	0.00131735	0.000766597	0.000665559	0.000614883	0	0	8.67e-05	0	0	0.000479747	0.000300852	0	0.000755329	0.00328242	0.000392697	0.000132203	0.0012055	0.00043082	0.000338395	0	0	0
PC(O-16:0/20:3)	0	0	0	0	0	0	0	0.000209163	7.69e-05	0	0	0	0	3.31e-05	0.000100144	0	0	0	0	0	0	0	0	0	0	0	0	0	0	0	0	0	0	0	0	0	0	0	0	0.000439012	0.000111708	0	0	0	0	0	0	0
PC(O-16:0/20:4);PC(P-18:0/18:3)	0	0	0	0	4.07537e-05	3.91e-05	3.55e-05	0.000218989	8.4e-05	0	0	0	0	0.0004326	0.000227508	8.2e-05	0	0	0	2.54e-05	0	0	0	0	0	0	0.000101007	0	0	0.000112135	0	0	0	0	0	0.000210293	2.56e-05	0	0	0.00352905	0.00108354	0	0	0	6.68e-05	0	0	0
PC(O-16:0/20:5);PC(P-16:0/20:4)	0.000348608	0.00253841	0.000438011	0.000962339	0.00089794	0.00193052	0.00069784	0.00665077	0.00431004	0.000502111	0.00088856	0.000403018	0.00012587	0.000398138	0.00368784	0.00172423	0.00018776	0.000477135	0.000883875	0.000322392	0.000634602	0.000337171	0.00122202	0.00201519	0.00228788	0.000402905	0	0.000950931	0.00230955	0.00455694	0.000947176	0	0.000589026	0	0.000255075	0.00190562	0.00107478	0.000195837	0	0.0272383	0.0149208	0	0.00104535	0.000157043	0.000408776	0	0	0
PC(O-16:0/22:5);PC(P-18:0/20:4)	0	0	0	0	0	0	0	5.47e-05	2.03e-05	0	0	0	0	9.45e-05	5.89e-05	0	0	0	0	0	0	0	0	0	0	0	0	1.39e-05	0	0	0	0	0	0	0	3.61e-05	0	0	0	0.00148779	0.00045748	0	0	0	0	0	0	0
PC(O-16:0/22:6)	0	0	0	0	0	0	2.91e-05	0	1.5e-05	0	5.55e-05	0	0	0	2.68e-05	0	0	0	3.57e-05	0	0	0	0	0	0	0	0.00011037	0	0	1.39e-05	0	0	0	0	1.81e-05	0	5.4e-05	0	0	0.000424783	8.38e-05	0	0	1.05e-05	0	0	0	0
PC(O-18:0/16:0)	0.000682287	0.000918454	0	0.00193282	0	0	0.00238088	0.0168453	0.00912459	0	0	0	0	0.00764122	0.00632692	0.000916935	0.000109734	0.00110618	0.00140385	0	0.000115523	0.000682822	0.000202209	0.000494788	7.61e-05	0	0.000707072	0.0014656	0.00238539	0.00203543	0.000161804	0.00037468	0.000432745	6.89e-05	0.000110737	0.0028696	0.00151251	0	0.00144818	0.0020737	0.000502228	0.000435664	0.00231012	0.00165568	0.000585457	0	0	0
PC(O-18:0/20:4)	0	0	0	0	0	0	0	0.000145714	5.97e-05	0	0	0	0	0.000249633	5.59e-05	0	0	0	0	0	0	0	0	0	0	0	0	0	0	0	0	0	0	0	0	3.04e-05	0	0	0	0.000463351	0.00019362	0	0	0	0	0	0	0
PC(O-18:0/22:4)	0	0	0	0	0	0	0	0	0	0	0	0	0	0.00278869	0	0	0	0	0	0	0	0	0	0	0	0	5.98e-05	0	0	2.15e-05	0	0	0	0	0	7.45e-05	0	0	0	0.000167919	2.82e-05	0	0	0	0	0	0	0
PC(O-18:0/22:5)	0	0	0	0	0	0	0	0	0	0	0	0	0	0.000178741	0	0	0	0	0	0	0	0	0	0	0	0	0	0	0	0	0	0	0	0	0	0	0	0	0	6.6e-05	0	0	0	0	0	0	0	0
PC(P-16:0/16:0)	0.000406977	0.00888746	0.00256703	0.00253362	0.0132677	0.0112887	0.0130732	0.01225	0.00613257	0.000775324	0.00392261	0	0.00310696	0.00759731	0.00854168	0.000400136	0.00290998	0.0021415	0.0010491	0.00390392	0.00249077	0.00455512	0.000241416	0.00287806	0.00632628	0.00186391	0.00229503	0.00964769	0.00515067	0.00892547	0.00409524	0.000196181	0.00632661	0.00318669	0.00464348	0.00209798	0.00257331	0.00301012	0.00394386	0.0111555	0.00814392	0	0.00510047	0.0033932	0.00105821	0	0	0
PC(P-16:0/18:1)	0	0	0	0	0	0	0	0.00159099	0.000659576	0	0	0	0	0.000337384	0.000475691	0	0	0	0	8.49e-05	0	0	0	0	0	0	0.00021112	0	0	0	0	0	0	0	0	0	0	0	7.67e-05	0.00286588	0	0	0	0	0.000154211	0	0	0
PC(P-16:0/18:1);PC(P-18:0/16:1)	0	0.00541954	0.000490923	0.00204241	0.00403415	0.00228798	0.00293681	0.0195541	0.0135712	0.000191997	0.000800428	0.00110527	0.00060181	0.00557923	0.00677655	0	0.000724019	0	0.00116412	0.00187797	0.00122815	0.00131191	0	0.00127797	0.00187422	0	0	0.00270243	0.00242896	0.00779213	0.00185902	0	0.00178366	0.00137575	0.00109716	0.00353498	0.000662934	0.000394992	0	0.0268624	0.0113391	0	0.000483609	0.000283432	0	1.27e-05	0	0
PC(P-18:0/16:0)	0.00152949	0.00675175	0.000597945	0.00554649	0.0023324	0	0.00832077	0.0405084	0.0213694	0	0	8.97e-05	0.000185961	0.023809	0.0256898	0.00297459	0	0.00055008	0.00499305	0	0.000994163	0.00101905	0.000928921	0.00197297	0.00103382	0	0.00491937	0.0067259	0.00903078	0.00972538	0.000336364	0.00110961	0.00215747	0.000434559	0.00047823	0.0139802	0.00322811	0	0.00300885	0.0304114	0.0222686	0.00113981	0.00637561	0.00306345	0.00348317	0	0	0
PC(P-18:0/20:4)	0	0	0	0	0	0	0	0.000156135	5.14e-05	0	0	0	0	2.72e-05	0	6.02e-05	0	0	0	0	0	0	0	0	0	0	0	0	0	3.65e-05	0	0	0	0	0	1.64e-05	0	0	0	2.17e-05	3.67e-05	0	0	0	2.85e-05	0	0	0
PE(16:0/16:0)	1.97e-05	0	0	0	0	0	0	0	0	0	0	0	0	0.000900564	0.000168756	4.41e-05	0	0	2.03e-05	0	0	0	0	0	0	0	0	0	0	0	0	2.69e-05	0	0	0	0.000130192	2.32e-05	0	0	0	0	0	0	0	2.67e-05	0	0	0
PE(16:0_18:0)	0.000140012	0.000129772	0.00037406	7.4e-05	0.000450366	0.000103861	0.000821296	0.00107854	0.000723618	9.35e-05	0	0	7.31e-05	0.000708065	3.92e-05	0.00018483	0.00013509	0.000244677	0.000143186	1.31e-05	6.55e-05	4.8e-05	0.00032947	0	0	3.01e-05	0.000147275	6.51e-05	6.29e-05	3.8e-05	4.02869e-05	0.000147126	2.56e-05	0	2.25e-05	8.89e-05	1.91e-05	7.82e-05	7.36e-05	0.000455657	0.000468788	0	3.98e-05	0	8.59e-05	0	0	0
PE(16:0_18:1)	0.0011897	0.00621676	0.0150006	0.00182252	0.0091514	0.00254617	0.0268022	0.0184844	0.012323	0.00296401	0.000371118	0.000655229	0.00269332	0.00174091	0.00341061	0.00341947	0.00539476	0.00669173	0.00257878	0.000156082	0.0128481	0.00605529	0.00604842	0	0.000145709	0.00137323	0.0106003	0.0049712	0.00407939	0.00200431	0.00211578	0.00196545	0.00105831	0.000970212	0.00149237	0.00431446	0.000339352	0.0010125	0.000724043	0.00247487	0.00989353	0.00218088	0.000319669	0.000273253	0.0061319	1.87e-05	4.31e-05	1.09e-05
PE(16:0_18:1)a	0.00182507	0.0106605	0.0285389	0.000986795	0.0196875	0.0056319	0.0408233	0.0246066	0.0254364	0.00169806	0	0.000151779	0.00150446	0.0026926	0.00763112	0.00422321	0.00948189	0.00457597	0.0018037	0.00207774	0.010434	0.00463825	0.00242714	0.000274722	0.000496983	0.00319264	0.00491947	0.00616252	0.00526748	0.00269641	0.00499063	0.00341467	0.001246	0.000891641	0.00138786	0.00367002	0.000169722	0.00255512	0.00105112	0.00470433	0.0213197	0.00255849	0.000396682	7.39e-05	0.00523387	0	0	0
PE(16:0_18:1)b	0.00160602	0	0	0	0	0	0.0072372	0	0.00979366	0.000696713	0	0	0	0.00154901	0	0.0013495	0.000604686	0	0.0011493	0	0	0	0.00286417	0	0	0	0.00433581	0.00236703	0	0	0	0.00228584	0	0	0	0.00217717	0.000177029	0	0.000502205	0	0	0.00669052	9.68e-05	1.55e-05	0.00515799	0	0	0
PE(16:0_18:2)	0.00019957	0.000815471	0.00369123	0.000878092	0.0190007	0.00763074	0.0211882	0.00307214	0.0134677	0.00303745	0.00291221	0.00148585	0.00875582	0.00054196	0.00375832	0.000859831	0.000649247	0.00518574	0.000356753	0.000324957	0.00824214	0.00849783	0.00304139	0.00014434	0.000168502	0.000587251	0.00260029	0.0015239	0.00183249	0.00055461	0.00328017	0.000918301	0.00077342	0.00216015	0.0044113	0.00151123	8.01e-05	0.000806621	0.000567957	0.0028366	0.00854087	0.000848912	0.00013422	2.79e-05	0.00188013	0	0	0
PE(16:0_18:3)	0	3.56e-05	0.000137345	3.16e-05	0.00029805	0.000154442	0.000232864	0.000604419	6.97e-05	0	0.000618651	0.000543965	0.00268833	2.27e-05	0.000314407	3.42e-05	0	0.000177749	0	0	0.000301763	9.91e-05	8.73e-05	0	0	0	3.05e-05	3.83e-05	0	0	3.55781e-05	3.3e-05	2.89e-05	0.000175461	0	1.95e-05	0	2.17e-05	0	0.000107072	0.000482588	0	0	0	0	0	0	0
PE(16:0_20:4);PE(18:2/18:2)	0	7.71e-05	7.52e-05	0	0.000294602	4.57e-05	0.000243828	0.000450106	0.000483324	0	0	0	0	0	0.000368733	0	2.05e-05	0	0	0	0.000264188	0.000131984	0	0	0	0	0	0	9.73e-05	5.09e-05	0.000123738	7.23e-05	4.61e-05	4.67e-05	0	2.52e-05	0	0	0	0.000204795	0.000497066	0	0	0	0	0	0	0
PE(16:0_22:5);PE(18:1_20:4)a	0	0	0	0	7.22969e-05	3.06e-05	0	0.000187019	4.77e-05	0	0	0	0	0	0.000138685	0	0	0	0	0	3.07e-05	1.95e-05	0	0	0	0	0	3.3e-05	0	0	1.70042e-05	0	0	4.6e-05	0	0	0	0	0	7.03e-05	5.81e-05	0	0	0	0	0	0	0
PE(16:0_22:5);PE(18:1_20:4)b	0	0	0	0	0	0	0	7.76e-05	2.16e-05	0	0	0	0	0	0	0	0	0	0	0	0	0	0	0	0	0	2.86e-05	0	0	0	0	0	0	0	0	0	0	0	0	6.32e-05	0	0	0	0	0	0	0	0
PE(16:0_22:6)	0	0	0	0	0.000108022	0	0	0.000220523	8.94e-05	0	0	0	0	0	0	0	0	0	0	0	0	0	0	0	0	0	0	0	0	2.24e-05	0	0	0	0	0	4.15e-05	0	0	0	0	6.44e-05	0	0	0	0	0	0	0
PE(17:1_18:0)a	0	0.000130946	0.000337625	3.28e-05	0.000638161	0.000280668	0.00244972	0.00148648	0.00155735	0	0	0	8.46e-05	0.000160323	0.000144991	6.1e-05	0.000130463	0	9.42e-05	0	0.000456344	6.08e-05	0.000271174	0	2.28e-05	0.000111044	0.000490117	0.000140846	0	2.8e-05	0.000449322	6.52e-05	0.000133731	7.96e-05	0	8.41e-05	0	0.000102616	3.98e-05	0	0.000912137	0.000162074	0	0	0.000511688	0	0	0
PE(17:1_18:0)b	0.00501242	0.000136849	0.000196602	0.00169887	0.00128996	0.000656986	0.0236917	0.00576164	0.0143979	0.00629114	0	0	8.79e-05	0.00884314	0.000619719	0.023465	0.0110695	0.00626979	0.000768397	0	0.000247864	0.000120543	0.0351458	8.36e-05	7.02e-05	0.000161466	0.0560453	0.00383378	0.000160384	0.00123494	9.61392e-05	0.00378717	0	0	0	0.0101468	2.93e-05	0.000755814	0.00563059	0.00129332	0.00119234	0.0149307	0.000241794	0.000142068	0.0289333	0	0.00012099	5.98e-05
PE(18:0_18:1)	6.87e-05	0.000252221	0.000356964	0.000161968	0.000919358	8.29e-05	0.00214379	0.0100325	0.00444809	0.000113915	0	4.88e-05	0.000318513	0.000237515	0.000101678	8.31e-05	9.48e-05	0.000112042	0.000188064	0	0.000314658	0.000146615	0.000233424	0	1.99e-05	2.83e-05	0.000419602	8.53e-05	0	0.000124891	0.000162181	0.000323948	0.000135628	8.34e-05	4.6e-05	0.000242674	0	9.24e-05	4.78e-05	0.000344526	0.000329258	5.8e-05	0	0	0.000246936	0	2.84e-05	0
PE(18:0_18:2);PE(18:1/18:1)	0.000158965	0.000467442	0.000463984	0.000344478	0.0069179	0.00199908	0.00344009	0.00599733	0.00279126	0.000430252	0.000290459	0.000523298	0.000880564	0.000234588	0.000253055	0.000528143	0.00116662	0.000705822	0.000157829	0.000201141	0.00255098	0.000979611	0.00065672	0.000124425	3.2e-05	0	0.00218973	0.00099999	0.000461054	0.000443971	0.000613652	0.000546494	0.000274515	0.000623298	0.000145867	0.000572418	3.07e-05	0.000130968	8.48e-05	0.000189617	0.00110705	0.000827162	0.000139722	4.53e-05	0.000949654	9.1e-05	0.000385243	0.000134919
PE(18:0_20:4)	0	5.08e-05	1.89e-05	8.39e-05	0.000287599	9.33e-05	6.61e-05	0.000648704	0.000220611	8.01e-05	0.000101763	5.39e-05	0	0	3.6e-05	0.000101732	0	7.59e-05	2.36e-05	0	9.09e-05	0.000122814	0.000118836	1.65e-05	1.12e-05	2.91e-05	0.000396355	2.5e-05	5.94e-05	4.48e-05	7.5865e-05	0	0.000142517	4.35e-05	0	0.000227533	2.66e-05	1.46e-05	0	0.00171353	0.000469336	6.66e-05	1.76e-05	0	4.96e-05	0	0	0
PE(18:1_18:2)	0	5.8e-05	0.000182855	6.86e-05	0.000659209	0.000397753	0.00412658	0.00149196	0.000998898	0.000217568	0.000719599	0.000348314	0.00319344	0	0	0.000262452	6.46e-05	0.00218212	0	0	0.00179801	0.00143531	7.82e-05	4e-05	3.25e-05	5.1e-05	0.000845747	8.3e-05	0.000224871	3.54e-05	0.00118382	0	3.83e-05	0.000119488	0.000294051	9.15e-05	0	0.000257896	0	0.00089385	0.000160468	0.000159562	0	0	0.000235023	0	0	0
PE(18:1_18:2)a	0	0.000108866	0.000321444	0	0.00026781	0.000170178	0.00597196	0.00310882	0.0018237	0	0.000133434	0.000100923	0.00142084	0	0	0.000122899	0	0.00240099	0	0	0.00133287	0.000970612	0	0	0	0	0.000289606	0	0.000194561	0	0.00109864	0.000170724	0	0	0.000323029	3.88e-05	0	0.000437003	0	0.000592378	0.000103321	0.000208054	0	0	0.000182751	0	0	0
PE(32:1)a	0.000639997	0.00144024	0.0028827	0.000591651	0.00161758	0.00104	0.0054044	0.00833453	0.00509846	0.000296911	2.84e-05	4.07e-05	7.77e-05	0.000263972	0.0023562	0.000492371	0.000713991	0.000887574	0.000405266	0.000150816	0.00161984	0.000710861	0.00146005	2.4e-05	2.55e-05	4.07e-05	0.00200304	0.00232138	0.00152384	0.000854436	0.00340271	0.000450025	0.000145645	0.000577161	0.000437925	0.00140558	4.49e-05	0.000254519	0	0.00045252	0.00224419	0.000478795	5.32e-05	2.28e-05	0.00262379	0	0	0
PE(32:1)b	0.000965526	0.00139969	0	0.000305696	0.0016144	0.00298348	0.00249307	0	0.00328913	0.00321567	0	0	0	0.00192549	0	0.00108274	0.00189514	0.000679156	0.000332192	0.000248186	0.00247499	0.00244814	0.00333091	5.07e-05	6.21e-05	0.000462796	0.00531981	0.000806298	0	0	0	0.00176193	7.55e-05	0	0	0.00156578	0.000121782	0.00139608	0.000337938	0	0.000672708	0.00287496	0	2.75e-05	0.00377703	0	0	0
PE(O-16:0/20:4)	0	0.000400831	0	9.58e-05	0	0	0	0.000905107	0.00025493	0	0	0	0	0	0	0	0	0	0	0	0	0	0	0	0	0	0	0	0	0.000213312	0	0.00019825	4.93e-05	0.000184827	0	0.000396411	0	0	0	0.000264868	0.000241529	0	0	0	0	0	0	0
PE(O-18:0/20:4)	0	0.000724567	0	0.000329677	0.00048506	0	7.32e-05	0.00244027	0.000680364	0	0	0	7.2e-05	0	9.9e-05	4.5e-05	7.67e-05	0	3.97e-05	0	0.000141933	0.000122107	7e-05	1.91e-05	9.47e-05	0	0.000126465	0	0	0.0016827	0.000230278	9.87e-05	0.000439015	0.00037725	8.78e-05	1.72e-05	0	0	0	0.000191717	6.59e-05	0	0	0	3.69e-05	0	0	0
PE(P-16:0/18:1)	0.00243471	0.00587986	0.00174972	0.0023815	0.0128608	0.00381752	0.00641716	0.0313564	0.0105763	0.000266913	0.000317108	0.000553683	0.00122244	0.00138733	0.00254519	0.000123467	0.00313678	0.00567699	0.000444608	0.000564266	0.00471099	0.00387921	0.000721365	0.000583589	0.00166379	0.00194385	0.00871885	0.00215839	0.0102076	0.0143459	0.00367161	0.00141229	0.00438157	0.00583157	0.0039376	0.00772228	0.000313177	0.00298834	0.000341456	0.00534174	0.0100328	0	0.00031369	0.000300682	0.000878027	0	0	0
PE(P-16:0/18:2)	0.000411733	0.00154203	0.000179231	0.000992609	0.00394272	0.000663878	0.000901031	0.00549374	0.00192813	0.000152663	3.79e-05	6.33e-05	0.000256721	0.000241439	0.000391444	5.6e-05	0.000117862	0.000423531	0.000100815	0.000110457	0.00138758	0.00110695	0.000280318	0.000112072	8.28e-05	0.00043009	0.00114491	0.000229467	0.000682465	0.00152692	0.000469683	0.00128654	0.000572288	0.00142337	0.000808125	0.00199031	4.07e-05	0.000212756	0.000353615	0.000418613	0.00107651	0	0	0	0.000156913	0	0	0
PE(P-16:0/20:2)	9.27e-05	0.000495861	2.71e-05	0.000130404	0.00134187	0.000170808	0.000442507	0.00418397	0.00164392	0	4.12e-05	7.75e-05	0.00021144	8.32e-05	4.02e-05	0	0	0	0	0	0.000365342	0.000193056	0	0	4e-05	0	0.000553111	0	0.000170519	0.00124034	0.000317878	0.000114063	0.000549234	0.000644085	0.000115697	0.000284649	0	0	0	0.000676657	0.000984779	0	0	0	0	0	0	0
PE(P-16:0/20:3)	0	0.000405029	0	8.24e-05	0	0	0	0.000972034	0.000231967	0	0	0	0	0	0	0	0	0	0	0	0.000216114	6.72e-05	0	0	0	0	6.27e-05	0	0	0.000215931	4.82658e-05	0.000189409	5.85e-05	0.000162147	0	0.000402946	0	0	0	0.000289395	0.000279858	0	0	0	0	0	0	0
PE(P-16:0/20:4)	0	0.00111169	3.34e-05	0.000248218	0.000617703	0	0.000291749	0.0056553	0.0020852	0	0	0	4.15e-05	0	0.000199056	6.13e-05	3.3e-05	0	0.000122359	0	0.000137466	0.00013491	0.000249361	0	3.03e-05	4.42e-05	0.000219082	3.55e-05	4.75e-05	0.00110162	0.000137946	0.000262765	0.000241766	0.000483522	8.14e-05	6.43e-05	0.000106562	0	2.19e-05	0.0024078	0.000450034	0	0	0	0	0	0	0
PE(P-16:0/22:4)	0	0.000199007	0	1.87e-05	0.000101965	2.89e-05	3.3e-05	0.00112347	0.000303604	0	0	0	0	0	0	0	1.43e-05	0	0	0	0	0	5.63e-05	0	0	0	0	7.07e-06	0	0.000243966	5.99072e-05	0	0.000113616	0.000159841	0	2.63e-05	1.48e-05	0	0	0.00249844	0.00167856	0	0	0	0	0	0	0
PE(P-16:0/22:5)	0	0.0004294	0	7.47e-05	0.000184674	0	8.6e-05	0.00171923	0.000679444	0	0	0	0	0	6.07e-05	3.09e-05	0	0	3.71e-05	0	2.76e-05	4.05e-05	8.24e-05	0	0	0	5.14e-05	0	0	0.000374438	3.68861e-05	6.78e-05	6.59e-05	0.000162976	0	5.53e-05	6.43e-05	0	0	0.00163707	0.000296107	0	0	0	0	0	0	0
PE(P-16:0/22:6)	0	0	0	0.000128502	0	0	0	0.00110154	0.000444416	0.000139388	0	2.79e-05	5.53e-05	0	0	0	0	0	4.83e-05	0	0	0	2.78e-05	0	0	0	4.4e-05	0	0	0.000306017	0	0	0	9.22e-05	0	0	0	0	0	0.000257516	0	0	0	0	0	0	0	0
PE(P-18:0/18:1)	0.0002019	0.00141315	0.000190291	0.00099885	0.00277716	0.000113229	0.00258745	0.0258716	0.0110422	0	0	0	0.000310922	0.000133813	0.000553975	0.000215281	8.13e-05	0	0.00016655	0	0.000799861	0.00100461	0.000268991	0	0.000271895	7.53e-05	0.000602237	9.03e-05	0.000286944	0.00159212	0.00076917	0.000992564	0.000709185	0.00115606	0.000161611	0.000152336	1.4e-05	2.21e-05	0.000132725	0.00162921	0.000561683	5.63e-05	4.54e-05	1.87e-05	0.000523516	0	0	0
PE(P-18:0/18:2)	0	0.00133315	8.03e-05	0.00060679	0.00239597	0.000254687	0.0016603	0.015351	0.00440915	0	0	6.86e-05	0.000550622	0	0.000458412	0.00011928	3.76e-05	0.000242056	8.2e-05	0	0.000853174	0.000923192	0.000368678	0	0.000106736	0	0.000756191	5.36e-05	0.000288799	0.00104703	0.000739765	0.000979225	0.000762473	0.00216475	0.000822788	6.06e-05	3.41e-05	9.02e-05	0	0.000680806	0.000303352	5.19e-05	0	0	0.000202603	0	0	0
PE(P-18:0/20:3)	0	0.000276752	0	2.69e-05	0.000293349	0	0.000373079	0.00773056	0.00363995	0	0	0	0	0	0.000191567	5.23e-05	2.61e-05	0	0	0	0	0	7.33e-05	0	4.29e-05	1.42e-05	7.41e-05	0	0	0.000213292	3.61013e-05	0.00010948	0	4.64e-05	3.4e-05	0	0	0	0	6.76e-05	5.69e-05	0	0	0	3.93e-05	0	0	0
PE(P-18:0/20:4)	2.64e-05	0.00224631	6.42e-05	0.000476039	0.00351448	0.000430299	0.000881916	0.0134726	0.00588629	0.000180913	7.87e-05	0	0.000428623	0	0.000760776	0.000240298	0.000188245	0	0.000223894	0	0.000810189	0.000751481	0.00042312	6.02e-05	0.000254155	0.000230733	0.000893868	0.000128729	0.000153354	0.00457781	0.00093356	0.000500075	0.00106234	0.00101474	0.000183959	9.5e-05	5.38e-05	4.3e-05	4.2e-05	0.00209912	0.00141948	6.81e-05	0	0	0.000103897	0	0	0
PE(P-18:0/20:5)	0	0	0	0	0.00180524	0	0	0.00118136	0.000201975	0	0	0	0.000620123	0	0.000258302	0	0	0	0	4.72e-05	0.000392036	0.00033486	0	0	0	0	0	0	0	0.00165961	0	0	0	0.000305308	0	0	0	0	0	0.00147107	0.000919057	0	0	0	0	0	0	0
PE(P-18:0/22:4)	0	0.000156472	0	0	0.000107446	0	7.16e-05	0.00150966	0.000425557	0	0	0	0	0	0	0	0	0	0	0	0	0	0	0	0	0	0	0	0	0.000186607	0	0	7.41e-05	8.77e-05	0	0	0	0	0	0.00107115	0.000268849	0	0	0	0	0	0	0
PE(P-18:0/22:5)	0	0.000102229	0	3.74e-05	5.46521e-05	0	0	0.00121136	0.000309758	0	0	0	0	0	0	0	0	0	0	0	0	0	0	0	0	0	0	0	0	0.000100176	3.76709e-05	0	0	7.83e-05	0	0	0	0	0	0.000283804	0.000160674	0	0	0	0	0	0	0
PE(P-18:0/22:6)	0	0.00273457	0	0.000476946	0.00218395	0.000446508	0.00011167	0.00258705	0.000938327	0	0	0.000259388	0.00046203	6.25e-05	0.000241357	3.3e-05	0	0	0.000124371	6.88e-06	0.0016944	0.00100343	0.000225047	0	0.000122859	9.46e-05	0.00028413	0	0	0.00255633	0.000430236	0.000347437	0.00056361	0.000741993	3.81e-05	8.38e-05	2.68e-05	0	3.16e-05	9.51e-05	0.00038476	0	5.63e-05	0	7.28e-05	0	0	0
PG(14:0_16:0)	7.34e-05	0.00400299	0.000630122	0	0.00064271	0.000754966	0.0100759	2.82e-05	4.36e-05	3.93e-05	7.53e-05	6.76e-05	0.000534993	0.0150912	0.00054391	0	0.000223609	0.000289125	0	7.43e-05	0.000170476	0.000115536	0	1.02e-05	6.95e-05	0.000406359	0.000348998	0.00010219	0.000129068	0.000283578	0.000802564	0	0.000841383	4.32e-05	5.44e-05	2.52e-05	4.62e-05	5.86e-05	0	0.000282343	0.000390266	1.35e-05	6.37e-05	4.49e-05	0	0	0	0
PG(14:0_18:1);PG(16:0_16:1)	0.00248611	0.0016304	0.000759956	0.000173483	0	0.000205997	0.000971975	0.0027539	0.00181899	0.000225885	0	0	0	0.000708355	0.00211536	0.000865776	0.00125915	0.000835618	0.000822977	0.000219703	0.000479841	0.00034959	0.000570445	0.000122248	5.67e-05	0	0.00245791	0.00111525	0.00302903	0.000654132	0.000114713	0.000478624	0	0.000147908	0.00040977	0.00299664	0.000173357	0.000213542	0.000181234	0.000968677	0.000376125	0	0.00038251	0.000181354	0.00150965	0	0	0
PG(15:0_16:0)	0.00144596	0.0045794	0.0020436	0.000167475	0.00238371	0.00277454	0.00460058	0.000701732	0.000633607	0.000260782	0.00044241	0.000673366	0.00105526	0.00619529	0.00325539	0	0.00114839	0.00110731	3.31e-05	0.0010871	0.00155075	0.0010382	0	0.000188749	0.000871404	0.000403963	0.00174694	0.00229621	0.00182178	0.00187342	0.00140689	0	0.00194189	0.000682262	0.00144058	0.000336602	0.000986296	0.00103582	3.57e-05	0.00112861	0.00364417	0	0.00178951	0.000697454	0	0	0	0
PG(15:0_18:1)	0.000192427	0.00117448	0.000607964	0	0	0.000685482	0.000704931	0.000812375	0.00184483	0.000128392	0	4.96e-05	8.4e-05	0.000395937	0.000985127	6.69e-05	0.000476306	0.000921971	0.000235426	0.000191625	0.00126286	0.0014949	0.000237054	0.000163201	0.000367331	0	0.000859338	0.000427843	0.00114827	0.000834457	0.000247057	0.000157736	0	0.000142795	0.000618663	0.000724426	6.17e-05	0.000302789	0	6.77e-05	0.000535377	0.000147485	0.00023881	0.000169104	0.000501723	0	0	0
PG(15:0_18:3)	0	0	0	0	0	0	0.000328977	0.000231595	0.000146111	0	0	0	0	0	0	3.15e-05	0	0.000550355	0	0	0	0	0	0	0	0	0	0	3.83e-05	0	0	0	0	0	0	0	0	0	0	0.000215865	0	0	3.64e-05	0	0	0	0	0
PG(15:0_20:4)	0	0	0	0	0	0	0.000313926	0	0	0	0	0	0	0	0	0	0	0	0	0	0	0	0	0	0	0	0	0	0	0	0	0	0	0	0	0	0	0	0	0	0	0	0	0	0	0	0	0
PG(16:0/16:0)	0.00215696	0.006574	0.00634555	0.000793234	0.00162997	0.00162166	0.00336535	0.00336361	0.00326917	0.000918131	0.000669887	0.00127264	0.00112458	0.00488207	0.00452755	0.00169823	0.00293052	0.00785503	0.00139375	0.00251018	0.00231905	0.00367797	0.00143012	0.000403595	0.00158291	0.00042276	0.00223879	0.00172082	0.00534149	0.00381229	0.0010594	0.00211746	0.000711872	0.00147908	0.00402986	0.00179129	0.000808512	0.00143995	0.000450404	0.0029767	0.002855	0.000832634	0.00224654	0.000589703	0.00121168	0	0	0
PG(16:0_17:1)	0.000549497	0.000415807	0.000429526	0	0.000655228	0.00141115	0.000292001	0	0.0006921	0	0.000212398	0.000274865	0.000331535	0.000225056	0.00130252	3.17e-05	0.000420973	0	0	0	0.00123674	0.000380331	0	0.0002021	0.000156125	0	0.00247322	0.000767054	0.000686269	0.000580421	0.000510055	0	0.000605499	0.000227693	0.000538773	0.000690822	0.000178723	0.000242523	0	0	0.00138089	0	0.000561532	0.000307443	0	0	0	0
PG(16:0_18:0)	0.000733745	0.00190044	0.0023159	0.000230066	0.00108161	0.000618725	0.000312894	0.000583992	0.000445629	0.000197399	0.000273089	0.000380955	0.000350202	0.000475594	0.000748644	0.000211221	0.00115959	0.00215481	0.000456902	0.000438408	0.000911145	0.00101739	0.000195888	0.000213975	0.000398888	0.000325667	0.000216324	0.00016554	0.00190005	0.000815662	0.000492378	0.000390518	0.000419784	0.000512216	0.00113506	0.000587007	0.000391551	0.00166928	5.41e-05	0.000166734	0.00273362	0	0.000358054	0.000101146	0.000282152	0	0	0
PG(16:0_18:1)	0.00736441	0.0117176	0.0099519	0.00295387	0.00755563	0.00825277	0.0185812	0.0204616	0.016575	0.00180733	0.0026857	0.00255392	0.00284538	0.0108948	0.019912	0.00487064	0.0141554	0.0144853	0.00655109	0.00822119	0.0150962	0.022908	0.00437855	0.00197156	0.00518433	0.00303977	0.0121546	0.0130479	0.0334589	0.015148	0.00478911	0.00343627	0.00524883	0.00418567	0.00695171	0.017727	0.00371888	0.00709558	0.00136195	0.0088491	0.0150191	0.00168144	0.00952142	0.00303286	0.00838694	0	0	0
PG(16:0_18:2)	0.00175722	0.000510011	0.000134221	0.00181313	0.000174453	0.000514379	0.00366461	0.000934495	0.0184262	0.000484161	0.000194706	0	0	0.00345361	0.00193141	0.00473315	0.0005637	0.00553092	0.0067703	0.000339474	0.000603159	0.00116234	0.00105691	0	0.0008238	0	0.00559007	0.000737441	0.00414966	0.00215036	0.000156925	0.00491702	0.000191902	0.00331828	0.000415203	0.00371086	0.00048574	7.14e-05	0.0047168	0.0198529	0.0011064	0.00684741	0.00265411	0.000811959	0.000487128	0	0	0
PG(16:0_19:1);PG(17:0_18:1)	0.00359959	0.0017707	0.000804319	0.000857064	0.00189539	0.00213288	0.00346604	0.00275499	0.00903929	0.00187269	0.000419093	0	0	0.0100664	0.00313451	0.0219532	0.00668872	0.00511925	0.00287189	0.000731628	0.00215055	0.00292092	0.00862752	0.000441091	0.000833139	0.000594233	0.0174055	0.00196644	0.00412368	0.0024285	0.00073563	0.00876252	0	0	0.000806631	0.00895835	0	0.00234996	0.00081635	0.00302527	0.00330617	0.00181527	0.00160913	0	0.0110974	0	0	0
PG(16:0_20:3)a	9.38e-05	4.16e-05	0.000187901	4.03e-05	0	5.4e-05	0.000420287	0.000558599	0.000530977	3.04e-05	0.000135335	0.000219671	0.000375264	0.000118513	0.000401946	9.05e-05	3.74e-05	0.000679145	8.02e-05	2.9e-05	0.000257001	0.000471613	2.92e-05	5.64e-06	1.33e-05	6.75e-06	0.000253372	8.19e-05	0.000143965	6.74e-05	4.00253e-05	0	2.92e-05	3.46e-05	7.36e-05	0.000382511	3.64e-06	2.71e-05	3.38e-05	0.000539692	0.000116788	5.25e-05	9.29e-05	9.78e-06	8.09e-05	3.54e-08	6.47e-07	2.57e-07
PG(16:1_17:1)	0	0	0	0	0	0	0.000153413	0	0.000491348	9.2e-05	0	0	0	0	1.74e-05	4.94e-05	0	7.27e-05	0	0	0.000116786	9.1e-05	0.000100881	0	0	0	0.000636838	0	0	0	0	0	0	0	2.13e-05	0.000265476	0	0	0	0	0	7.67e-05	1.68e-05	0	0.00029248	0	0	0
PG(16:1_18:1);PG(17:1/17:1)	0.000664007	0	0.00118337	0.000213342	0	0.000590946	0.00649321	0.000965732	0.00263014	0.000395458	0.001408	0.00130826	0.00270082	0.000632026	0.000843809	0.00107815	0.000394915	0.00705771	0.000692557	0	0	0	0.00238179	0	0	0	0.00194242	0.000435292	0.000816502	0.000396116	0.00068907	0.000802566	0	0	0.00968826	0.00204431	0	0.000209386	0.000367484	0.00220541	0.000821914	0.000823904	0.000536013	5.23e-05	0.00171802	0	0	0
PG(17:0_18:2);PG(17:1_18:1)	0.000124497	0.000351883	8.12e-05	0	0.000264445	0.000406161	0.00058131	0.000572115	0.00136581	0	0	4.12e-05	9.13e-05	0.000623302	0.000428948	0.000496412	0.000464411	0.000236459	0	0	0.0002967	0	0.000119691	4.97e-05	6.02e-05	0	0.00063015	0.000625047	0.0018878	0.000774194	0	0	0	0	0.000339988	0.000680837	0	0.000116348	5.07e-05	0	0.000430256	0.000156369	0.000430297	0.000190511	0.000746016	0	0	0
PG(18:0/18:0)	0.000460305	0.000384925	8.18e-05	0.00116947	0	0	0.000691775	0.0043966	0.00387147	0	0	0.000225923	0	0.00369047	0.00111765	0.00167193	0.001808	0.00156377	0.00160305	9.92e-05	0	0	0.000734938	0	8.3e-05	6.22e-05	0.000430944	0.000273903	0.000615546	0.000151612	0	0.00325757	0	0.000729475	0.000405093	0.000413348	0.000839657	0	0.00252955	0.000183747	0.000120261	0.000766682	0.000530613	0.000502723	0.00084029	2.2e-05	0	0
PG(18:0_18:1);PG(16:0_20:1)	0.0030008	0.00729989	0.00422724	0.000813442	0.00365995	0.00504107	0.000855927	0.00237202	0.00169113	0	0.000912835	0.00153814	0.000992354	0.00268518	0.00760237	0.00127397	0.00470135	0.00372961	0.000939349	0.00162892	0.00691775	0.00451833	0.000671653	0.000736798	0.00148168	0.00169673	0.00274794	0.00128327	0.0262154	0.0115405	0.00446087	0.000869607	0.00262355	0.00146317	0.00260493	0.00321688	0.00138693	0.00692357	0.00043692	0	0.0082472	0	0.00228036	0.000647434	0.00125831	0	0	0
PG(18:0_18:3);PG(16:0_20:3)b;PG(18:1_18:2)	0.000468104	0	0	0.000427919	8.57694e-05	0.000117701	0.00079515	0.00145576	0.00389145	0.000402859	0.000308107	0.000194296	5.02e-05	0.00100409	0.000484955	0.000554364	0.000212418	0.00105229	0.000876421	0	0	0.000343723	0.000504741	0	0.000159298	0	0.00454951	0.000143695	0.000596982	0.000388443	8.42363e-05	0.000806896	0	0.000778003	0.000131173	0.000317464	0.00016885	2.44e-05	0.00307676	0.00481183	0.000604772	0.00131255	0.000529709	0.000236898	0.000397319	0	0	0
PG(18:0_20:2);PG(18:2_20:0)	0.00103815	0.00389383	0.000189186	0	0	0.000701574	0	0	0	0	0	0	0	0.00111981	0.00203317	0.0073109	0.00125602	0	0	0.000228168	0.0017627	0.00106579	0.000505012	0	0.000218515	0	0.00462571	0.000288113	0.00391769	0.00138094	0.000377008	0.000298674	0.000186161	0.000308661	0.000168914	0.0121202	0	0.000176942	6.06e-05	0	0.00388002	0.000284414	0.00142046	8.96e-05	0.00182656	0	0	0
PG(18:1_20:1)	6.14e-05	0.00681819	0.00208713	0.000140875	0.00112966	0.00194652	0	0	3.31e-05	0	9.53e-05	0.000268287	0.000279702	6.81e-05	0.0137465	0.000184545	0.00398921	0.0048583	8.13e-05	0.00064223	0.00488141	0.00472843	0	7.45e-05	0.000442834	0.00018545	0.000274287	0.00194683	0.0346857	0.0163197	0.00156693	0	8.03e-05	0.000237378	0.000244723	0.000203867	6.65e-05	0.00149693	2.3e-05	6.18e-05	0.00214519	0	0.00116483	0.000169275	0.000124396	0	0	0
PG(18:1_22:6);PG(18:3_22:4)	0	0	0	0	0.00097542	0	0	0	0	0	0	0	0	0	0	0	0	0	0	0	0	0	0	0	0	0	0	0	0	0	0	0	0	0	0	0.000494521	0	0	0	0	0.000219256	0.00018313	0	0	0	0	0	0
PG(18:2_19:0)	0.000527274	0.00594029	0.00169639	0.000179075	0.00168696	0.00249597	0.00138467	0.00116638	0.0012251	0	0.00186781	0.000644921	0.000645057	0.00314994	0.00607728	0.00194973	0.00522941	0.00332297	0.000523965	0.000984723	0.00440915	0.00385592	0.000441981	0.000490217	0.00137326	0.000391451	0.00209608	0.00437028	0.0191268	0.0105055	0.00114161	0.000618297	0.00275643	0.000713107	0.00176856	0.00358531	0.00026716	0.00164506	9.19e-05	0	0.00622215	0.000292711	0.00267032	0.000620182	0.0019154	0	0	0
PG(20:4/20:4)	0.000139466	0	0	0.000149736	0	0	0	0.000803891	0.00178071	0.000169317	0	0	0	0.000457993	0.00043238	0.000213622	7.6e-05	0.000450913	0.00038046	0	0	0	0.000119592	0	0	0	0.000148543	0	0.000121609	0.000121076	0	0	0	0	0	0	6.64e-05	0	0.000860356	0.000217195	5.05e-05	0	0.000147699	0	5.19e-05	0	0	0
PG(34:1)	0.00623944	0.00935781	0.00845596	0.00286421	0.00682239	0.00743262	0.0178261	0.0186781	0.0156739	0.00186488	0.00190516	0.00240538	0.00236419	0.0094877	0.0173646	0.00469879	0.0121234	0.0133668	0.00633016	0.00746203	0.0130687	0.0211184	0.00432115	0.00151368	0.00441634	0.00229243	0.0119081	0.0109888	0.0289161	0.0126808	0.00415285	0.000671506	0.00443179	0.0037732	0.00609002	0.0168593	0.00342412	0.00592844	0.00124597	0.00807287	0.0114208	0.00166679	0.00801797	0.00222702	0.00798309	1.63e-05	3.09e-05	2.84e-05
PG(36:2)	0.0009195	0.00268563	0.00143315	0.000735416	0.00176384	0.00144812	0.00314802	0.00828381	0.0045617	0	0	0	0	0.0011042	0.00799743	0.00101516	0.00157716	0.0014547	0.000818344	0.000788712	0.00392736	0.00373597	0	0	0	0	0.00264925	0.00205712	0.00638674	0.00294048	0.00137905	0	0	0	0.000641179	0.00246682	0	0.00149039	0	0.000863744	0.00212789	0	0.00138709	0.000438564	0.000919039	0	0	0
PG(36:6)	3.6e-06	4.11e-06	1.97e-07	7.67e-06	9.91157e-06	7.69e-06	5.68e-06	1.85e-05	1.36e-05	0	4.01e-06	3.87e-06	5.76e-06	2.3e-05	1.84e-05	1.51e-05	5.11e-06	9.05e-06	1.62e-05	2.91e-05	4.27e-06	6.26e-06	1.29e-05	5.75e-06	5.19e-06	1.16e-06	1.35e-05	4.12e-06	8.02e-06	4.18e-06	2.02743e-06	2.13e-06	3.41e-06	8.73e-06	8.89e-06	3.18e-05	8.34e-06	1.59e-06	1.93e-05	2.59e-05	3.38e-06	2.27e-05	8.09e-06	9.86e-06	1.69e-05	6.27e-06	3.17e-06	0
PG(38:4)	9.67e-06	1.25e-05	4.7e-06	7.99e-06	7.25372e-06	4.09e-06	2.09e-05	3.41e-05	2.5e-05	8.23e-06	3.29e-05	1.33e-05	5.44e-06	0.000118853	1.1e-05	2.58e-05	1.39e-05	2.1e-05	9.33e-06	2.64e-05	4.48e-05	1.5e-05	1.88e-05	5.47e-06	1.58e-05	1.27e-06	3.53e-05	2.62e-05	6.08e-05	2.84e-06	6.27848e-05	9e-06	1.05e-05	1.15e-05	0.000120087	5.57e-06	7.33e-06	6.37e-06	2.1e-05	5.27e-06	8.7e-06	1.44e-05	3.26e-05	1.11e-05	1.75e-05	3.52e-06	5.29e-06	4.61e-06
PG(41:6)	0.000476141	0.0015267	0.0056432	0.000823634	0.000737908	0.00111326	0.0261007	0.0138666	0.0103649	0.00311792	0.0030027	0.00775422	0.00595334	0.00624582	0.0013995	0.00212986	0.00245303	0.0282797	0.00158359	0.00615657	0.00617854	0.0115685	0.000663413	0.00137282	0.00165313	0.00126114	0.00457873	0.00342708	0.00273122	0.00161151	0.00435156	0.000748699	0.000473146	0.00143443	0.00337373	0.00259062	0.000367904	0.00360123	0.000594927	0.00542839	0.000596987	0.00245874	0.000554683	0.000421255	0.00244244	8.62e-06	4.54e-06	1.81e-06
PG(46:6)	0	0	0	0	0.00496487	0.00125523	0	0	0	0	0	0	0	0	0	0	0	0	0	0	0	0	0	0	0	0	0	0	0	0	0	0	0	0	0	0	0	0	0	0	6.42e-05	0	0	0	0	0	0	0
PI(14:0_18:0);PI(16:0/16:0)	9.41e-05	0.000107856	0.000278768	0	0	0	0.00145005	0.00171434	0.00160379	0	0	0.000745329	0.00056111	0.000730762	0.000504519	0.000183818	0	0.00129797	0.000307778	0.000192701	0	0.000411001	0.000122661	8.28e-05	0	0	0	0	0.000343312	8.83e-05	0	0	0	0.00199129	0	0.000264404	0	5.12e-05	0.000175763	0.000242327	3.84e-05	0.000254723	0	0	0.000257322	0	0	0
PI(16:0_16:1)	9.11e-05	0.0001232	0.000556866	9.79e-05	0	0.00011224	0.000709858	0.000991989	0.000425252	0	0	0	0	0.000284894	0	0	9.32e-05	0.000360121	0.000195692	0.0015158	0.000322002	0.000192908	0	0	5.74e-05	0	0.000378065	0.000613986	0.000325108	0.000166023	0.000164036	0	0	0	0.00011437	0.00060556	0	0.000167961	0	0.000281341	3.88e-05	0	0	0	0.000161263	0	6.54e-08	0
PI(16:0_18:1)	0.000523672	0.00169435	0.00589089	0.000874161	0.000911709	0.00108893	0.0281622	0.0160351	0.0113695	0.00323894	0.00286294	0.00928126	0.00684741	0.00694613	0.0014993	0.00171972	0.00262359	0.0291178	0.00158377	0.00669754	0.00731604	0.0125334	0.000611696	0.00152263	0.00175291	0.00138957	0.00347637	0.00378602	0.00286929	0.00166096	0.00490884	0.000815803	0.000301914	0.00148013	0.00307166	0.00314155	0.000387276	0.00393532	0.000686106	0.00477907	0.000587484	0.00257095	0	0.000435748	0.00278401	0	0	0
PI(16:0_18:2)	9.28e-05	0.000311198	0.00718155	0.000575728	0.000343503	0.00147119	0.0283249	0.00619435	0.0064952	0.00142827	0.00961007	0.0111822	0.0158865	0.00621973	0.000775026	0.00119636	0.000525121	0.0462824	0.000655504	0.000730536	0.00363625	0.0124752	0.000413547	0.000178409	0.00121362	0.000161957	0.0024982	0.000572404	0.00265131	0.00076826	0.00565713	0.00107824	0.000286875	0.00220073	0.0252434	0.00251187	3.54e-05	0.000523911	0.000606226	0.00745931	0.000643536	0.00500601	0.000490442	0.000459451	0.00121111	0	0	0
PI(16:0_20:3)	0	0	0.00205869	1.51e-05	0	0	0.00213975	0.00143897	0.000585289	0	0.00510048	0.0147619	0.0141747	0.00284218	0.0001654	0	0	0.00154683	3.17e-05	0	0.000129904	7.64e-05	0	0	6.29e-05	0	0	0.000189093	0	0	0.000119422	0.000161	0	0	0	0.000241091	0	0	2e-05	0.000248359	8.01e-05	0	0	9.89e-05	7.49e-05	0	0	0
PI(16:0_20:4)	0	8.59e-05	2.88e-05	4.36e-05	0	0	0.000652704	0.00164539	0.00110096	0	0	0	0	0.00383862	0.000131877	3.77e-05	0	0	4.94e-05	0	0	0	0	0	0	0	0	7.16e-05	0	8.28e-05	0	0.000113438	0	0	0	0.00049532	0	0	2.83e-05	0.000928953	0.000162281	0	0	0	0.00017695	0	0	0
PI(16:0_22:3)	1.56e-05	0	0	0	0	0	0	0.000569161	0.000225508	0	0	0	0	0.00607792	0.000635322	0.00018146	0	0	0	0	0	0	0	0	0	0	0	0	0	0	0	0	0	0	0	0.00159476	6.29e-05	0	0	0.00269538	0.000510974	0	0	0	8.86e-05	0	0	0
PI(17:0_20:4)	0	0	0	0	0	0	0	0.000171405	7.77e-05	0	0	0	0	0.000111051	0	0	0	0	0	0	0	0	0	0	0	0	0	0	0	0	0	0	0	0	0	0	0	0	0	6.88e-05	1.91e-05	0	0	0	0	0	0	0
PI(18:0_18:1)	0.000242376	0.000430494	0.000740484	0.00048358	0.000143943	8.77e-05	0.00132089	0.00958014	0.00343476	0.00029793	0.000292342	0.00124257	0.000687627	0.00527722	0.000514438	0.000961383	0.000879312	0.000647226	0.000470161	0.00118395	0.000608735	0.000229437	0.000226547	0.000445741	0.000157257	0.000311839	0.000855896	0.000354363	0.00110847	0.000365223	0.00167497	0.000124808	0	0.000186269	0.000545922	0.00188911	0	0.00166915	0.000351022	0.000247494	0.000278118	0	0	5.14e-05	0.00101782	0	0	0
PI(18:0_18:2);PI(18:1/18:1)	7.31e-05	0.000700086	0.00178145	0.00073969	0.00020977	0.00011932	0.00365931	0.011651	0.00552543	0.000150698	0.00269224	0.00563926	0.00634493	0.0167978	0.000943159	0.0005476	0.000413721	0.00307261	0.000438996	0.000186508	0.00048493	0.00118507	0.000340677	0.000159173	0.0001824	0.000116187	0.00022501	0.000310137	0.000787384	0.000770418	0.00377759	9.81e-05	0.000150124	0.000372157	0.00445671	0.00270513	0.000107679	0.000574081	0.000871133	0.00112276	0.000725757	0.000132006	4.67e-05	0.000517486	0.00145015	0	0	0
PI(18:0_20:3)	0	0.00011045	0	6.52e-05	0	0	0.000266211	0.00732556	0.00293671	0	0	0	0	0.017587	0.001436	0.000259493	0	0	0.00019677	0	5.76e-05	6.63e-05	7.97e-05	1.65e-05	1.73e-05	0	0.000145751	0.00019772	0.000126447	0.000145179	0	0	0	0	2.3e-05	0.00202776	3.2e-05	0	4.23e-05	0.00346647	0.000967533	0	3.44e-05	2.56e-05	0.000606172	0	0	0
PI(18:0_22:4)	0	0	0	7e-05	0	0	0	0.00122351	0.000374472	0	0	0	0	0.00831349	0.000412678	9.13e-05	0	0	0	0	0	0	0	0	0	0	0	0	0	4.45e-05	0	0	0	0	0	0.000465661	0	0	0	0.0012159	0.000267758	0	0	0	0.000273164	0	0	0
PI(18:0_22:6)	0	0	0	0	1.1905e-05	1.24e-06	0	0.000228844	8.16e-05	0	0	0	0	0.00117624	0	0	0	0	4.57e-05	0	0	0	0	0	6.55e-05	2e-05	0	0	0	2.75e-05	0	0	0	0	0	2.24e-05	0	0	0	0	0	0	0	0	2.02e-05	0	0	0
PI(18:1_18:2);PI(18:0_18:3)	0	2.18e-05	0.000433732	4.77e-05	0	4.33e-05	0.0015467	0.00103333	0.000447856	0.000444088	0.000771329	0.00157501	0.00169764	0.000121709	1.54e-05	0.00116925	1.74e-05	0.00578458	2.84e-05	5.29e-05	0.000251604	0.00186308	3.69e-05	0	4.92e-05	0	5.03e-05	2.61e-05	0.000356141	7.47e-05	0.000588349	0.000137525	8e-06	7.13e-05	0.000350547	0.00010543	0	3.82e-05	4.7e-05	0.00102014	3.83e-05	0.000528141	0	4.8e-05	7.09e-05	0	0	0
PI(18:1_20:3);PI(18:0_20:4)	4.45e-05	0.000477704	4.65e-05	0.000525563	0.000157959	8.73e-05	0.000553275	0.00874452	0.00426322	0	6.63e-05	6.48e-05	0	0.0441395	0.00442413	0.00104905	6.92e-05	2.81e-05	0.000635391	0.000126876	0.000198976	0.000180308	0.000354122	8.95e-05	0.000100602	0.000121444	0.000544017	0.000646913	0.000375608	0.000760607	0.000103333	0	0.000121113	6.68e-05	7.95e-05	0.00726025	0.000556793	0	0.000366147	0.0272787	0.00828812	0	0.000224731	4.85e-05	0.0015769	0	0	0
PI(18:1_20:4)	0	0	0	0	0	2.71e-05	0	0.000536141	0.000231205	0	0	0	0	0.0001957	5.98e-05	0	0	0	0	0	0	0	0	0	0	0	0	0	3.41e-05	4.34e-05	0	0	0	0	2.21e-05	0.000101236	0	0	0	0.00129068	0.000151102	0	0	0	0	0	0	0
PS(16:1_22:1)	0	0	0	0	0	0	0.00123585	0	0	0	0	0	0	0.00133309	0.000164353	0	0	0	0	0	0	0	0	0	0	0	0	0	0	0	0	0	0	0	0	0.00132032	0	0	0	0	0.000551653	0	0	0	0	0	0	0
PS(18:0_20:0)	0.000309307	0.000441536	0.00021177	0.000521302	0.00207516	0.000769537	0.011948	0.0227863	0.00701421	0.00345961	0.0023152	0.00185687	0.0030776	0.0704077	0.0148419	0.00756028	0.000140842	0.00536812	0.00548275	0.00178882	0.00325074	0.0037156	0.00110281	0	9.25e-05	5.87e-05	0.00780138	0.00147589	0.00287196	0.000706674	0.000650392	0.00205576	0.000457412	0.000608396	0.0013094	0.0252274	0.000515326	0.000271745	0.00107864	0.0244002	0.00638989	0.00182931	0.00103616	8.75e-05	0.0119305	0	0	0
PS(18:0_22:3)	0	0	0.0015049	0.000185337	0.000228179	0.00328805	0.00901237	0.000497866	0.000434158	0.000182705	0.00930273	0.00202882	0.0119807	0	0.000113575	0.00030028	0.000127557	0.0276163	0.000139713	0.000398122	0.000896784	0.00589698	0.000108032	0.000126219	0.000366359	5.17e-05	0.000398619	0.000134111	0.00149623	0.000438965	0.00519106	0.000230773	6.64e-05	0.000164878	0.0177346	0.000812773	0	5.73e-05	0.000723219	0.00229343	0.000659336	0.00270023	0	0.00019343	0.000372792	0	0	0
PS(38:1)	0	0.000344602	0.000600277	0.000350757	0.000879301	0.00174288	0.0064899	0.00318981	0.0016363	0.00117175	0.00603135	0.00298607	0.0077871	0.00987739	0.0016283	0.00138696	0	0.00596931	0.000856149	0.000470236	0.00114493	0.00314563	0.000488705	0.000296813	0	0	0.00129941	0.000343084	0.00142204	0.000442596	0.00219155	0.000479549	0.000229321	0.000577736	0.0114081	0.0207503	0.000145993	0	0.000108479	0.00401985	0.0054525	0.00112109	0.000126806	6.21e-05	0.00459839	0	0	0
SM(d16:1/16:0);SM(d18:1/14:0)	0.00471303	0.0110144	0	0.00342091	0	0	0.00600239	0.0261402	0.0171842	0.000946604	0	0	0	0.00774026	0.00924435	0.00190709	0	0.007199	0.00709992	0	0	0	0.00228139	0	0	0	0.00175438	0.00690632	0.00308776	0.00672506	0	0.000583714	0	0.00108417	0	0.00455788	0.00347426	0	0.00313425	0.00297712	0	0.00260457	0.00976617	0.0106945	0.001021	0	0	0
SM(d16:1/24:1);SM(d18:1/22:1);SM(d18:2/22:0)	0.00133441	0.00145236	0	0.000633624	0	0	0.00120444	0.00541243	0.0039213	0	0	0	0	0.00304135	0.00161205	0.000382553	0	0.00094518	0.0033544	0	0	0	0.000998918	0.000548468	0	0	0.000862861	0.00291175	0	0.00127224	0	0	0.00031662	0	0	0.00247413	0.00126213	0	0.000834403	0.00154667	0	0.000615231	0.00184428	0.00166275	0.000273186	0	0	0
SM(d17:0/18:1)	0.00194942	0.00188034	0	0.000650977	0.000495816	0	0.00334647	0.00572937	0.00713742	0.000754631	0	0	0	0.00230783	0.00189442	0.000543956	0	0.00172894	0.00224396	0	0	0.00034448	0.00120948	0.000211421	0.000163571	0	0.00151339	0.00123488	0.00200973	0.000792287	0	0.000277117	0	0.000120605	7.69e-05	0.00147696	0.000681328	0	0.00135432	0.00116224	0.000197923	0.00166259	0.00141109	0.00187659	0.000302864	0	0	0
SM(d17:1/16:0)	0.00396031	0.00492298	0.000197453	0.00198258	0	0	0.00432309	0.0190872	0.0140214	0.000869727	0	0	0	0.00153632	0.0041559	0.00148362	0.00164049	0.00410736	0.00562053	0.000261708	0.000251352	0.000796442	0.00165462	0.00142492	0.000490237	0.000286386	0.00109136	0.00388158	0.00297852	0.00355543	0.000665885	0.000400322	0.00097011	0.000517407	0.000237066	0.00241702	0.00278357	0	0.00231132	0.00126906	0	0.00139532	0.00408542	0.00429237	0.000515128	0	0	0
SM(d17:1/24:0);SM(d18:1/23:0)	0.00476888	0.0046454	0	0.000549018	0.000193611	0.000194179	0.00668347	0.0149623	0.0214552	0.000635038	6.46e-05	0	0	0.00585047	0.00381392	0.00326962	0.000494228	0.00464443	0.00386657	6.61e-05	0.000352165	0.00034086	0.00147543	0.000295058	0.000165512	0	0.00239888	0.0036032	0.00174402	0.00121477	0.000225612	0.000369909	0.000322795	8.96e-05	0.00019335	0.00459555	0.00385497	0	0.00233143	0.00496141	0.00038414	0.00341163	0.00402692	0.00527687	0.00324919	0	0	0
SM(d18:0/18:0)	0.00764034	0.00736117	0.00205152	0.00199531	0.00108234	0.000375919	0.0101509	0.0148237	0.0166066	0.00211882	0.000408189	0.000201946	6.65e-05	0.00692639	0.0159379	0.00271833	0.00436014	0.0099487	0.00695348	0.00202299	0.000588334	0.00227487	0.00364434	0.00123738	0.00108122	0.000391986	0.00303001	0.00363151	0.00420843	0.00240671	0.000226201	0.00111184	0.00064787	0.000478757	0.000807206	0.00565269	0.00468215	0	0.00461676	0.00402749	0.000471445	0.00670362	0.00730666	0.00713872	0.00181558	0	0	0
SM(d18:0/18:1)	0.000434379	0.000576121	0	9.22e-05	0	0	0.00106287	0.000616129	0.000395527	0.00126664	0.000644029	0.000258371	0	0.00261297	0.00145899	0.00170382	0.000104533	0.00109312	0.00186606	0.000128104	3.81e-05	0.000300535	0.0013667	4.9e-05	0	0	0.0024134	0.000817874	0.00259845	0.000655745	0	0	6.96e-05	0	0	0.000988726	0.000238686	0	0.000708447	0.00401659	0.000869341	0.000769239	0.00124482	0.000707291	0.000203762	1.71e-05	7.51e-06	6.3e-06
SM(d18:1/16:0)	0.00479662	0.0038404	0.000217429	0.00530398	0.00372543	0.00062257	0.00931192	0.0234054	0.0156854	0.0130517	0.000807259	0.000521938	0.000401867	0.0262009	0.00393749	0.00595065	0.000698799	0.00265771	0.0210087	0.00159688	0.000431266	0.00452579	0.0102734	0.0014437	0	0	0.00886055	0.00773014	0.00482791	0.00235227	0.000170352	0.00219657	0.00148154	0.00175587	0.000309893	0.00301576	0.000969175	0	0.0100899	0.0110222	0.000962269	0.0111153	0.00698033	0.00460646	0.00406199	0	0	0
SM(d18:1/18:0)	0.0201065	0.0396278	0.00491294	0.00446005	0.00148703	0.00213509	0.0208176	0.0112356	0.0131894	0.00293326	0.00311818	0	0	0.0293424	0.0403764	0.0142436	0.00712431	0.0263265	0.0220445	0.00255882	0.00345478	0.00537028	0.0175938	0.0038973	0.00156077	0.00065845	0.0137698	0.0133869	0.0429223	0.016208	0.00140021	0.00119839	0.00350083	0.000902939	0.00207377	0.0274669	0.0126852	0	0.00522178	0.0866475	0.0203502	0.0160393	0.0387881	0.0175994	0.00322798	3.56e-05	0	0
SM(d18:1/18:3)	0.000753283	0.000479681	0	0.000702511	0.00104655	0	0.000638795	0.00224335	0.0015008	0.00414039	0	0	0	0.00219345	0	0.00190409	0	0.000296765	0.00266128	0.000495552	0	0.000584511	0.00130223	0.000342135	0	0	0.000828075	0.00105704	0.00061078	0.000339029	0	0.000344678	0.000189901	0.000218089	0	0	0	0	0.00236415	0.00263927	0	0.00149799	0.00102611	0.000600301	0.000556918	0	0	0
SM(d18:1/20:0)	0.0112611	0.0154036	0	0	0	0	0.0176081	0.0144967	0.0172288	0	0	0	0	0.0155832	0	0.00643323	0	0.0205636	0.0115581	0	0	0	0.0045569	0.00327245	0	0	0.00428271	0	0	0	0	0.000720748	0	0	0	0.0133675	0.00953155	0	0.00319881	0.0277881	0	0.00516104	0.0220829	0.00947974	0.0028059	0	0	0
SM(d18:1/22:0)	0.0184217	0.014843	0.00108043	0.00295718	0.00217376	0.00146951	0.0301791	0.0428918	0.0508475	0.00434667	0.00113569	0.000240455	9.23e-05	0.0297068	0.0212931	0.017124	0.00463722	0.0193558	0.0165612	0.00109694	0.00115252	0.0020448	0.0103526	0.00352918	0.00148007	0.00032496	0.00635043	0.0117593	0.0139963	0.00734649	0.0011017	0.00236335	0.00350495	0.00187005	0.00102838	0.0200365	0.0123394	0.00100884	0.0105815	0.0250984	0.00431902	0.0152387	0.0194165	0.0125591	0.00855677	7.55e-06	0	0
SM(d18:1/24:0)	0.0164306	0.011762	0	0.00265085	0.00426143	0.00112681	0.0301591	0.048773	0.0453345	0.00317883	0	0	0.000126154	0.0269567	0.0219573	0.0115363	0.00196665	0.00854454	0.0169435	0.000545722	0.00111618	0.00145657	0.010868	0.00536959	0.00125776	0	0.00996822	0.00921042	0.0174469	0.00771397	0.000923323	0.00316495	0.00497581	0.00256209	0.00102968	0.0175181	0.0110985	0.000445619	0.0108447	0.0190447	0.00563043	0.0140398	0.0155608	0.00656902	0.00672498	0	0	0
SM(d18:1/24:1)	0.0177845	0.0185121	0.000785095	0.0147378	0.0031242	0.000701199	0.032226	0.0822382	0.0589297	0.00409956	0	0	0	0.0462028	0.0297949	0.0059441	0.0026249	0.0139863	0.0350723	0.000891001	0.000397049	0.00414991	0.0131642	0.00821409	0.00229153	0	0.0145716	0.0299976	0.0133198	0.0180936	0.000809971	0.00232135	0.00304695	0	0.000854997	0.0206007	0.0147172	0	0.0204396	0.0444801	0.00744618	0.0131784	0.0269789	0.024178	0.00327153	0	0	0
SM(d18:2/16:0)	0.00225093	0.00288055	0	0.00251438	0	0	0.00234357	0.0187721	0.00956493	0.000828945	0	0	0	0.00141434	0.00163608	0.000322799	0.000343133	0.0021262	0.00417415	0	0	0	0.00100419	0.00177589	8.12e-05	0	0.000658673	0.00701829	0.0010892	0.00368922	9.24768e-05	0	0.000833183	0.000191236	0	0.00221397	0.00143144	0	0.00277362	0.000817027	0.000346062	0.00157954	0.00185734	0.00573854	0	0	0	0
SM(d18:2/18:0)	0.00110953	0.000433207	0	0.000608716	0	0	0.000209834	0.00174602	0.000721278	0	0	0	0	0.000808673	0.000811965	0.000335353	0.000171649	0.000244945	0.00231442	0	0	0	0.000335498	0.000343478	0	0	0.0018766	0.00351792	0.00124064	0.000978376	0	0	0.000225997	0	0	0.000589413	0.000735589	0	0.00114829	0.000313147	0.000183241	0.000268492	0.000547733	0.00124427	4.41e-05	0	0	0
SM(d32:0)	0.000798587	0.00206705	0	0.000552509	0	0	0.00125198	0.00619334	0.00435048	0.000180607	0	0	0	0.00130646	0.00344231	0.0014158	0.00243108	0.00263566	0.00253455	0.000825626	0	0.000708651	0.000667964	0.00043221	0	0.00018372	0.000576045	0.00102979	0.000927866	0.00107015	0.000156058	0.000344835	0	0.000246966	0.000210623	0.00118035	0.00116714	0	0.00124632	0.0006404	0	0.000653005	0.00330322	0.00341398	0.000458667	0	0	0
SM(d32:1)	0	0	0	0	0	0	0	0.00145167	0.000740656	0	0	0	0	0.000767914	0	0	0	0	0.000689066	0	0	0	0	0	0	0	0	0	0	0	0	0	0	0	0	0.000202398	6.35e-05	0	0.000210868	0.000246797	0	0.000257367	0.000363321	0	0	0	0	0
SM(d34:1)a	0.00137611	0	0	0.000366036	0	0	0.000545766	0.00402651	0.00362841	0	0	0	0	0	0	0.00127506	0.0013779	0.00263149	0.00362578	0.000572142	0	0.000804326	0.00052428	0.000265146	0	0	0.0005616	0.00164362	0.00139851	0.00110515	0	0	0	0	0	0.000438263	0.000846644	0	0.000554733	0.000471199	0	0.000454801	0.00320693	0.00305493	0.000380329	0	0	0
SM(d34:1)b	0.0994987	0.105014	0.012259	0.0612529	0.0346257	0.00860404	0.0815065	0.186054	0.163439	0.0580639	0.00443137	0.00411867	0.00271921	0.160808	0.0962796	0.0381896	0.0352575	0.0459904	0.0967481	0.0188753	0.00767321	0.0437048	0.0711975	0.0338932	0.00839294	0.00608329	0.0452495	0.0725261	0.0552174	0.0544629	0.00340621	0.0237335	0.0260401	0.0165447	0.001907	0.0122046	0.0368297	0.00215032	0.0592272	0.102167	0.0120985	0.0860232	0.0932409	0.0856512	0.0302579	0	0	0
SM(d38:1)	0.000479993	0.000311434	0	9.79e-05	0.000113696	0	0.00102125	0.00133601	0.00111745	0.000462845	0	0	0	0.00196886	0.000627931	0.00161089	4.76e-05	0.000553518	0.00197255	8.67e-05	0.000114793	0.000224991	0.00101843	0.000266257	6.52e-05	5.5e-05	0.000916383	0.000418787	0.000539468	0.000236432	0.000102549	0	0	0	8.05e-05	0.000897594	0.000157409	2.56e-05	0.000554352	0.00400125	0.000284912	0.000549934	0.000629027	0.000536824	0.000417573	0	0	0
SM(d40:0)	0.00497611	0.00733934	0.000550447	0.00230705	0.00105567	0.00053248	0.00747742	0.0187142	0.0189517	0.00136382	0.000359151	0.00019222	0	0.00395386	0.0113294	0.00360103	0.0015857	0.00608197	0.00597322	0.000476866	0.000793055	0.000956993	0.00263113	0.000677649	0.000646821	0.000188021	0.00302077	0.00244913	0.0024209	0.00328658	0.000480518	0.00178899	0.00141897	0.000875018	0.000691228	0.00438723	0.00746812	0.000109076	0.00674095	0.00261152	0.000142663	0.00271313	0.00587353	0.00512962	0.00285562	0	0	0
SM(d41:1)	0.000595904	0	0	0	0	0	0.00137862	0.00117658	0.00165399	0.000120563	0	0	0	0.00115243	0.000313223	0.000677636	2.77e-05	0.000433975	0.001023	0	0	0.000100817	0.000421472	0	0	0	0.00124905	0.000290165	0.000347539	0.000235823	0	0	0	0	0	0.000979783	0	0	0.000604488	0.000870153	8.45e-05	0.000864839	0.000590329	0.000301964	0.00114397	0	0	0
SM(d41:2)	0.000770618	0.000462379	0	0	0	0	0.000854014	0.00251731	0.00216277	0	0	0	0	0.000691537	0.000596507	0	0	0	0.0010252	0	0	0	0	0.000218864	0	0	0.000213548	0.00135055	0.000557649	0.000459817	0	0	0	0	0	0.000878056	0	0	0.000416384	0.000173224	0	0	0.000477446	0.000596402	0	0	0	0
SM(d42:3)	0.00373835	0.00567807	0	0.00408654	0.000339238	0	0.00503423	0.0248762	0.0128766	0.00124793	0	0	0	0.0137374	0.00521052	0.0010308	0.000293606	0.00233379	0.011875	0.00016162	0.000192271	0.001064	0.00256546	0.00323875	0.00017239	0	0.00291831	0.0117019	0.0022133	0.00612698	0.000216495	0.00017269	0.00113766	0.000200857	0	0.00658988	0.00285875	0	0.00411623	0.018112	0.00258865	0.0017158	0.00781068	0.00672857	0.000738668	0	0	0
SQDG(16:0_18:3)	0.000255563	0	0	0	0.000215481	0.000135679	0	0	7.71e-05	0.00144001	0.000776844	0.000272114	0.000395307	0.00594254	0.0019432	0.000858654	0.00070707	0.000873941	0.000484301	0.000207077	0.000477081	0.000120914	0.00129108	0	0	0	0.000943066	6.64e-05	0.00198575	0.000172767	2.24979e-05	0.000116716	0.00242971	0.000758935	0.000290834	5.54e-05	2.59e-05	5.02e-05	0.000372691	0.0024265	0.000313224	0	0.00210446	0.000229631	0	0	0	0
SQDG(16:1_18:1)	0.000609141	4.32e-05	5.77e-05	8.57e-05	0	7.17e-05	0.000154441	0	0	0.00032701	0.000147927	8.42e-05	0.000290559	0.00117862	0.000283351	0.00154802	0.000178746	0.000321892	0.00204724	0.000912513	0.000109624	0.000163738	0.00102285	0	0.000112525	0	0.000702735	0.000127601	0.000487062	0.000233586	0.000109873	0.000560185	0.000164769	0.000686168	0.00141215	9.2e-05	4.91e-05	4.64e-05	5.6e-05	0.000405236	5.33e-05	9.92e-05	0.000422431	7.78e-05	0	0	0	0
SQDG(18:0_18:2)	7.35e-05	0	2.78e-05	0	0	0	0.000110229	0	0	3.35e-05	4.52e-05	0	0.000107246	0	9.61e-05	0.000171833	0	9.12e-05	0	0	0.00108001	0.000102643	8.32e-05	0	0	0	0.00886136	0	0	5.97e-05	5.84684e-05	0.000200122	0	0.000339219	0.000392376	3.65e-05	3.31e-05	0	0	0.000114699	0	0	3.8e-05	4.21e-05	0	0	0	0
SQDG(18:2_18:3)	5.17e-05	0	0	0	0	0	0	0	0	6.42e-05	6.41e-05	5.91e-05	9.89e-05	0.000108937	8.55e-05	0.000167372	4.34e-05	9.44e-05	0	3.58e-05	0	4.22e-05	3.31e-05	0	0	0	5.54e-05	0	0	2.79e-05	0	0	9.01e-05	9.94e-05	0	0	0	0	0	0.00012592	0	0	9.29e-05	3.23e-05	0	0	0	0
SQDG(18:3_18:3)	0	0	0	0	0	0	0	0	0	0	0	0	0	0.000241224	0.000224127	0	4.94e-05	9.71e-05	0	0	0	0	5.05e-05	0	0	0	0	0	8.29e-05	1.64e-05	0	0	0.000311666	3.27e-05	0	0	0	0	0	0.000208236	2.73e-05	0	0.000350921	3.73e-05	0	0	0	0
TG(12:0_12:0_18:1);TG(12:0_14:0_16:1);TG(12:0_14:1_16:0)	0.0105653	0.00451643	0.000705536	0.000385246	0.00037344	0.000926686	0.000191715	0	0.00033124	0	0	0	0	0	0.00257145	0.000891764	0	0.000380671	0.000473112	0.00211509	0.00057933	0.000698511	0.0028567	0.000662785	0.00255351	0.000121941	0.000273241	0	0.0017731	0	8.26667e-05	0.00118636	0	0.0339023	0	0.00014545	0	0.000114223	0	0	0	0.000272597	0	8.66e-05	0.00102338	0	0	0
TG(12:0_14:0_18:1);TG(12:0_16:0_16:1)	0.00380963	0.001467	0.000172417	0.000151577	0	0.000215005	0.00018404	0.000325674	8.12e-05	7.51e-05	0	0	0	0	0.0018186	0.000341679	0	4.3e-05	0.000127786	0.00151898	0.000607631	0	6.09e-05	0.000277169	0.000806986	0	0.000316009	0	0.00056247	0	0	0.000433743	0	0.0113969	0	0.000203074	0.000373253	0	4.43e-05	0	0	0	0	0	0.000344997	3.51e-05	4.7e-05	0
TG(12:0_14:0_18:2);TG(12:0_16:1_16:1)	0.00364373	0.00222172	0.00044651	0.000824869	0	0	0.000526727	0.000220339	0.000470371	0.000939163	9.19e-05	8.33e-05	0	0	0.000532188	0.000218948	0	0.000231363	0.000767559	0.000991326	0.00163356	0.000849556	0.00370841	0.000215326	0.00130501	0	0.000700023	0	0.000471654	0	0	0.000977171	0	0.00992741	0	0.000226951	0	0	5.1e-05	0	0	0.000262727	0	0.000109434	0.00144663	2.57e-05	0	0
TG(12:0_16:0_18:1);TG(14:0_14:0_18:1);TG(14:0_16:0_16:1)	0.000750506	0.000287168	0	9.72e-06	0	0	0.00032678	0.0014263	9.78e-05	0	0	0	0	9.32e-05	0.00319543	0.000590366	0.00020769	0	2.74e-05	0.000829465	0	0	0	0.000118046	0.000117495	0.000114083	0	0	0.000260536	0	0	0.000118587	0	0.0100478	0	0.000608913	0.000564092	0	0.000186418	0	0	0	0	0	9e-05	6.35e-05	6.74e-05	0.000108537
TG(12:0_16:1_18:1);TG(14:0_14:0_18:2);TG(14:0_16:1_16:1)	0.00175461	0.000829868	0.000141567	0.000987498	0	6.54e-05	0.00124468	0.000961899	0.000249106	0.00100882	0.00012962	9e-05	3.2e-05	2.74e-05	0.00032728	0	5.18e-05	5.29e-05	0.00030769	0.00191575	0.00246723	3.33e-05	0.000106548	8.25e-05	0.000259073	0	0.0015842	0	0.00014017	0	0	0.000136938	0	0.00353201	2.4e-05	0.000397534	0.000464623	0	0.000317567	0	0	4.79e-05	0	8.85e-05	0.000559844	0	3e-05	0
TG(14:0_14:0_16:0);TG(12:0_16:0_16:0)	0.000419494	0.000647167	0	0	0	0	0.000108667	0.000257762	0	0	0	0	0	0.000800049	0.00389033	0.000428797	0	0	0	0.000198096	0	0	0	0	2.02e-05	0.00405255	0	0	0.000268671	0	0	5.58e-05	0	0.00879979	0	0.00340749	0.000533477	0	5.7e-05	2.89e-05	0	0	0	0	3.9e-05	0.000105277	7.8e-05	0.000169035
TG(14:0_16:0_16:0)	0.00104232	0.00088657	9.65e-05	2.69e-05	0.00183948	0.00404499	9.14e-05	0.000933002	0.00110392	0	0	0	0	0.0116437	0.00389717	0.00102926	0.000497655	0	4.09e-05	0	4.71e-05	0	0	0.000192367	4.6e-05	0.00555823	0.000208355	8.01e-05	0.00167533	0.00105388	0.00016193	0.000175141	5.99e-05	0.00331355	0	0.0230354	0.0044916	0.00541246	0.000434575	0.00186168	0.000240494	7.66e-05	0.000207153	0	0.000160734	0.000115975	4.4e-05	0.000270902
TG(14:0_16:0_17:0)	0.000846049	0.000365141	8.17e-05	2.7e-05	0	0.000484715	3.12e-05	0.00043321	0.000361352	0	2.15e-05	1.16e-05	3.56e-05	0.000394184	0.000549448	0.000222308	0	6.05e-05	5.31e-05	0	0	4.02e-05	3.19e-05	0	5.18e-05	0	2.85e-05	8.36e-05	0.00131313	0.000300015	0.000137168	0	0	0.000285946	0	0.00305042	0.000614722	0.000618405	0.000173632	0.000202608	0	0.000125118	0.000115594	0	0.00012878	4.7e-05	3.3e-05	0.000117304
TG(14:0_16:0_17:1)	0.00116046	0.000468806	8.49e-05	0.000123302	0.000245454	0	6.29e-05	0.00106068	0.000434639	4.26e-05	0	1.71e-05	2.72e-05	6.88e-05	0.000402604	0.000176459	0	5.03e-05	0.000187173	0.000919215	6.88e-05	6.24e-05	6.83e-05	0.000180991	0	0	0.000109254	0	0.000494588	6.08e-05	0	0.00015492	0	0.000495177	0	0.000314531	0.00035362	0	9.67e-05	0	0	7.89e-05	0	0	0.00043728	6.78e-05	2.84e-05	0
TG(14:0_16:0_18:1);TG(16:0_16:0_16:1)	0.00160866	0.000375785	7.99e-05	3.41e-05	0.00092089	0.000455164	0.000220603	0.0062094	0.000789142	0	0	2.47e-05	6.14e-05	0.0016911	0.00548572	0.00103957	0.00262937	0	0.000147363	0.00102311	0.00157981	0	5.54e-05	0.0002894	0	0.00053413	0.00238683	5.34e-05	0.00146985	0.000124205	0	0.00028583	0.000135096	0.00351144	0	0.00498553	0.00319763	0.000447809	0.00106423	0.000273131	8.37e-05	0.000103756	6.13e-05	0	0.000226692	0.000161315	5.39e-05	0.000168849
TG(14:0_16:0_18:2);TG(14:0_16:1_18:1);TG(16:0_16:1_16:1)	0.00292505	0.00232601	0.000659804	0.00142991	0.00102005	0.000247894	0.0020056	0.00760084	0.00144172	0.000808656	0.000387811	0.000226386	0.000115684	0.000467402	0.00179545	0.00035749	0.00098991	0	0.0014196	0.0065163	0.00381694	0.000182461	0.000433037	0.000455562	0.000611972	0.000218675	0.00588407	0.000317999	0.000463219	0.000167734	8.22743e-05	0.000376067	0.000161988	0.00931719	5.05e-05	0.00615686	0.00686771	0.000484645	0.00143588	5.49e-05	4.75e-05	0.000214991	0	5.78e-05	0.00100424	9.15e-05	4.88e-05	6.55e-05
TG(14:0_16:1_18:2)	0.00314989	0.00185765	0.00172446	0.00477442	0.000256072	0.000129541	0.00458192	0.00361305	0.000795829	0.00780396	0.000416064	0.000512256	0.000103918	0.000146982	0.000104198	0	0	0.000186627	0.00258091	0.0061493	0.00735317	4.61e-05	0.00097746	0.000116357	0.000262448	0	0.00724904	0.000128721	0.000123865	6.01e-05	6.86709e-05	8.59e-05	0	0.00146553	0.000111451	0.00303854	0.00518995	0.000228938	0.00104591	0	0	5.47e-05	1.96e-05	0.000283095	0.00251976	1.01e-05	0	0
TG(14:0_18:1_18:1);TG(16:0_16:0_18:2)	0.0122649	0.0290788	0.0110492	0.0136306	0.0330747	0.0337746	0.0107203	0.034144	0.0352733	0.0112035	0.0202214	0.0184817	0.0255227	0.0144444	0.00769344	0.00695456	0.0226594	0.0434147	0.02134	0.0234607	0.0340816	0.0387289	0.0179524	0.0113768	0.00435998	0.00863831	0.0421337	0.00917265	0.0311997	0.0227797	0.016901	0.0181112	0.0175945	0.0282182	0.00839036	0.0381601	0.028204	0.00953717	0.00925472	0.019903	0.00567766	0.0319955	0.011478	0.0100249	0.0154113	0.000223412	5.96e-05	0.000235367
TG(14:0_18:1_18:2);TG(16:1_16:1_18:1)	0.0141027	0.0170859	0.00791143	0.0119449	0.00512368	0.00462305	0.0162933	0.0260516	0.0107715	0.0103461	0.0224159	0.0231632	0.0198335	0.00179874	0.0013342	0.000419319	0.00158744	0.00761954	0.00904446	0.022012	0.0513076	0.00578426	0.00908387	0.00362294	0.0020498	0.00130844	0.0833823	0.00290953	0.00649481	0.00237412	0.00399413	0.00372639	0.00128679	0.0155669	0.00134817	0.0226282	0.0347622	0.00287058	0.00466711	0.000672304	0	0.00480605	0.00142448	0.00146844	0.0102824	3e-05	0	0
TG(14:0_18:3_18:3)	0	0.000286216	0.000404602	0.000144746	0	0	0	0	0	0.000561581	0.00253663	0.00353263	0.0051238	0	0	0	0	0.000288788	0	0	0.000133235	0.000242029	0.00169883	0	5.02e-05	0	0	0	0	0	0.000441503	0	0	0.000450852	0.00100762	0	0	0	0	0	0	0	0	0.000142491	0	0	0	0
TG(15:0_16:0_18:1);TG(15:0_17:0_17:1)	0.00311308	0.00108635	0.000671214	0.00106205	0.000571265	0.000455131	0.000412914	0.00578861	0.00304763	0.000368541	0.000619237	0.000409996	0.00060647	0.000140346	0.000841017	0.00033973	0.000329243	0.0016346	0.000958406	0.00160437	0.00127741	0.00130461	0.000774163	0.00048387	0.000245743	0	0.00179216	0.00018054	0.00262932	0.000630887	0.000858909	0.000329427	0.000117723	0.000730827	0.000245961	0.0020945	0.00155154	0.000262369	0.000693494	0.000193809	0	0.000748784	0.00019526	0.000181527	0.00186078	5.33e-05	0	0
TG(15:0_16:0_18:2);TG(15:0_16:1_18:1)	0.00180301	0.00273542	0.0013423	0.00267053	0.0005845	0.000823914	0.00182862	0.00438666	0.00308564	0.0031471	0.00134988	0.00125513	0.00141189	0.000150928	0.000284809	0.00026171	0.000215869	0.00514215	0.00199859	0.00350058	0.00294794	0.00286674	0.00185508	0.00126507	0.000882905	0.000296022	0.00443705	0.000354308	0.00176779	0.00089465	0.00214607	0.000684192	0.000168865	0.00268158	0.000938396	0.00173808	0.00287083	0.000285942	0.000716241	0.000177596	0	0.0019315	0.000433841	0.000562441	0.00188962	0.00505974	0	0
TG(15:0_16:0_20:3);TG(16:0_17:1_18:2)	0.00343574	0.00730292	0.00495634	0.0119509	0.000551293	0.00123793	0.0205382	0.00673564	0.00655974	0.0385668	0.0112744	0.0111057	0.0111256	0	0.000517837	0.000151618	0	0.010659	0.00496896	0.00493419	0.0145776	0.0102888	0.00742866	0.00308826	0.00591129	0.000198777	0.0218287	0.00111201	0.00400014	0.00316091	0.00647031	0.00242379	0.000326161	0.00355522	0.00447808	0.002071	0.00435858	0.000431223	0.00194687	0.000299446	0	0.00547435	0.00107337	0.00239194	0.00905578	8.99e-06	0	0
TG(16:0_16:0_18:0)	0.00783702	0.00409404	0.0032436	0.00268166	0.0159599	0.00932622	0.000629082	0.00314589	0.00303203	0.000193488	0.000583776	0	0.000455941	0.00409915	0.0350481	0.0040658	0.00252341	0.00159558	0.00213869	0.000292747	0.00564695	0.00362161	0.000753263	0.00372887	0.00108779	0.00192327	0.000521453	0.00366483	0.033239	0.00473631	0.00494508	0.00125005	0.00124177	0.00369946	0.00322262	0.0609061	0.0146402	0.0109343	0.00528039	0.00488885	0.00599357	0.0100501	0.0165209	0.00298306	0.000763124	0.00044458	0.000507255	0.00180025
TG(16:0_16:0_18:1)	0.0111354	0.0184608	0.00948597	0.00964019	0.0272831	0.0246855	0.00501785	0.0290607	0.026279	0.00540576	0.00676012	0.00693695	0.0137922	0.0515073	0.0219167	0.0115562	0.036967	0.0211716	0.0160408	0.0102904	0.0295667	0.0177909	0.0103817	0.00879642	0.00333698	0.0132098	0.0382802	0.00729046	0.0219739	0.0156119	0.00876454	0.00794827	0.0138792	0.0147347	0.00491744	0.0391154	0.013899	0.0148858	0.00768683	0.0212895	0.00386212	0.0226699	0.00611726	0.00324838	0.0128456	0.000505724	0.000200694	0.00073139
TG(16:0_16:1_20:4);TG(16:0_18:2_18:3)	0.0126908	0.0390301	0.0225321	0.0209066	0.00725619	0.0176942	0.0314205	0.00497383	0.0123865	0.010676	0.0683405	0.0697849	0.064985	0.000241704	0.00058178	0.00123446	0.00247369	0.0546443	0.0171336	0.00748929	0.0253516	0.0331458	0.0402134	0.0138455	0.0146655	0.00426734	0.0310652	0.00382637	0.0328335	0.0136921	0.0247711	0.0223698	0.00345796	0.0539403	0.00742629	0.00448296	0.00585905	0.00205143	0.00414962	0.00328101	0.000387723	0.0380922	0.00832499	0.00808518	0.00778295	1.69e-05	1.62e-05	3.69e-05
TG(16:0_17:0_18:1)	0.00461293	0.00122333	0.000997749	0.00365395	0.000741038	0.000570766	0.000405682	0.00935129	0.00478432	0.0021456	0.00137888	0.001906	0.00281725	0.00020287	0.00113002	0.000262649	0.000554187	0.00230698	0.0018697	0.00167068	0.00198191	0.00584712	0.00239613	0.000751684	0.00031021	0.000308445	0.0033036	0.000609856	0.00466948	0.00221216	0.00359045	0.000662242	0.0002934	0.0010414	0.00117235	0.00270524	0.00293747	0.00061846	0.00116231	0.000391174	0	0.00122036	0.000374961	0.000647671	0.00904147	0	0	0
TG(16:0_17:0_18:2);TG(16:0_17:1_18:1)	0.00591589	0.00387358	0.00338208	0.00950598	0.00110793	0.00138924	0.00758516	0.0109673	0.0078344	0.0182347	0.00896538	0.00867176	0.0084575	0	0.000945028	0.00029912	0.000470781	0.0094976	0.00465054	0.00648876	0.0160468	0.0132559	0.00694469	0.00194686	0.00265569	0.000407067	0.0217237	0.00149028	0.00732083	0.00482265	0.00977159	0.00220622	0.00054055	0.00331514	0.00559538	0.00346679	0.00512404	0.000691368	0.00220564	0.000641001	0	0.00444373	0.00114111	0.00244606	0.0123913	2.08e-05	0	4.9e-05
TG(16:0_18:0_18:0)	0.00537341	0.00139919	0.00363206	0.00875019	0.0441441	0.00768191	0.00130532	0.00252074	0.00061771	0.000782846	0.00377172	0.000936159	0.000702846	0.00129783	0.0666567	0.00652958	0.00728676	0.00224567	0.00310091	0.00172953	0.00744014	0.00733578	0.00189372	0.00601326	0.00315408	0.00213946	0.000580812	0.00921019	0.0610685	0.00508102	0.00898208	0.0031778	0.00566125	0.00777202	0.0103399	0.062493	0.0202974	0.00694229	0.0090897	0.00402072	0.00619859	0.0254835	0.0224662	0.0189255	0.000459256	0.000996188	0.00304851	0.00344597
TG(16:0_18:0_18:1)	0.0224858	0.0228195	0.0156863	0.0170616	0.0179465	0.010508	0.0213789	0.0324368	0.025125	0.0117103	0.0158358	0.0251514	0.0259347	0.00706189	0.0667195	0.00930088	0.0237176	0.0158977	0.0132244	0.0133608	0.0224848	0.02935	0.0130799	0.0197035	0.00844844	0.0145916	0.032169	0.00933286	0.0394442	0.0175854	0.0202004	0.0125135	0.00892794	0.0148082	0.0140556	0.0284808	0.0292012	0.0210796	0.00911492	0.00582898	0.00152311	0.0157462	0.00809818	0.00898898	0.0353701	0.000163264	7.6e-05	0.000362202
TG(16:0_18:0_18:2);TG(16:0_18:1_18:1)	0.0368081	0.0585834	0.0308576	0.0374028	0.0588492	0.0270804	0.0341781	0.065308	0.0652215	0.0759995	0.0554178	0.0633996	0.0678329	0.00323146	0.0357376	0.0164567	0.0343347	0.0650547	0.0448392	0.0391616	0.0720482	0.0722687	0.0495961	0.0326381	0.0202624	0.0162108	0.107927	0.0318215	0.0732479	0.0436818	0.0436974	0.0411538	0.0418782	0.0480797	0.0362815	0.0162185	0.0343761	0.0105875	0.0199806	0.0396671	0.0100196	0.069468	0.0301528	0.0274444	0.0507774	0.000728631	0.000296287	0.00114362
TG(16:0_18:0_19:1)	0.00288383	0.000937502	0.000574067	0.0019412	0.000224317	0.000144522	0.000753536	0.00443637	0.00209714	0.000928502	0.00214014	0.00264288	0.00323438	4.85e-05	0.0014327	7.53e-05	0.000244979	0.000957394	0.000660785	0.000647972	0.00018448	0.00240641	0.000680306	0.000852617	0.000429921	0.000155504	0.00058095	0.000334741	0.00445666	0.000942606	0.00275931	0.000249305	8.47e-05	0.000494325	0.000677743	0.00166769	0.00188889	0.000312116	0.000406857	0	5.68e-05	0.000375193	0.00016531	0.000497305	0.0141564	0	0	0
TG(16:0_18:1_18:2)	0.0486766	0.0724276	0.0499004	0.0403927	0.0650196	0.0418245	0.109761	0.0590741	0.0737611	0.112321	0.0891169	0.0915831	0.0841693	0.00301044	0.0250825	0.0170411	0.023534	0.067554	0.0475835	0.0536155	0.119661	0.0588599	0.0740965	0.0390303	0.0239883	0.0182997	0.153569	0.040312	0.0840414	0.0465719	0.0449899	0.0582903	0.0395967	0.0453839	0.0356059	0.0277396	0.0444235	0.0200435	0.0238302	0.0328657	0.0127768	0.0627511	0.0290127	0.0242823	0.0590565	0.000302302	9.66e-05	0.0003745
TG(16:0_18:1_18:3);TG(16:0_18:2_18:2)	0.0458493	0.0981614	0.064047	0.0561153	0.0685691	0.0746982	0.136402	0.0443539	0.0901844	0.095332	0.0694444	0.0779404	0.0754242	0.00264189	0.0119555	0.0151018	0.0196254	0.108008	0.0612073	0.0614105	0.102901	0.0926568	0.0891304	0.0528147	0.0261202	0.0216246	0.151235	0.0462729	0.109982	0.0648384	0.0543207	0.0676114	0.0395955	0.0654325	0.0854867	0.0238431	0.0296726	0.0239632	0.0214301	0.0202413	0.0118938	0.112578	0.0373153	0.0390851	0.0647165	0.000153135	0.000107021	0.000178824
TG(16:0_18:1_20:4);TG(18:1_18:2_18:2)	0.0873927	0.104348	0.069816	0.083751	0.0522492	0.0468182	0.220505	0.0489443	0.0963861	0.19343	0.131895	0.144304	0.141191	0.000636848	0.0199072	0.0164479	0.0110075	0.104575	0.0693337	0.0606734	0.0747465	0.106978	0.151175	0.0807224	0.107383	0.0240863	0.0895478	0.0710739	0.104116	0.0543926	0.0600882	0.0923793	0.0277885	0.0444853	0.0535045	0.0148929	0.0139353	0.0314171	0.0328784	0.0137891	0.00880294	0.0889125	0.0699618	0.0536538	0.0923071	0.000227176	0.000142294	0.000315334
TG(16:0_18:2_19:0)	0.00633092	0.00164644	0.00251053	0.0180691	0.000813671	0.000749409	0.00507852	0.00940031	0.00639003	0.0482899	0.00837383	0.0113749	0.010579	0	0.000628697	0.000205427	0.000233044	0.00586984	0.0044248	0.00783538	0.00629964	0.0152082	0.00805942	0.00116711	0.00119352	0.000199993	0.0121393	0.00159265	0.00514201	0.00475771	0.0085982	0.00264954	0.000560698	0.00211854	0.00464299	0.00136039	0.00291051	0.000447846	0.00127659	0.000417925	0	0.00297168	0.00108363	0.00260558	0.0317075	0	0	0
TG(16:0_18:3_22:4);TG(18:1_18:2_20:4)	0.00129636	0.00143421	0.00105974	0.0012302	0	0	0.00103985	0.0281333	0.0189936	0	0.00347717	0.00278686	0.00244323	0	0	0	0	0.000834866	0.00131814	0.000123227	0.00071854	0.00118337	0.00185162	0	0	0	0	0	0	9.26e-05	0	0.000262804	0	0	0	0.000665948	0.00051754	0	0.0139167	0.000606938	0	0.000151392	4.77e-05	0.000963889	0	0	0	0
TG(16:0_20:2_22:4);TG(18:0_18:0_22:6)	0.000244895	0.000462564	0.000928425	9.36e-05	0	0	0.000157761	0.00649191	0.002897	4.73e-05	0.0161091	0.0104083	0.0108742	0	0	0	0	0.00104898	0.000144605	0	0.000141858	0.00012741	0.00794884	0	0	0	0	0	0	8.89e-05	0	0	0	0.000542823	0	0.000291489	0.000163271	0	0.0016066	0	0	0	0	0.000388965	0	0	0	0
TG(16:1_16:1_18:2)	0.00151105	0.00326963	0.000916317	0.0028095	0.000881133	0	0.00378079	0.00528115	0.00463635	0.00525275	0.00119929	0.0015176	0.00106128	0.000238795	0	0	0.000210527	0.00114951	0.00217738	0.00290632	0.0225587	0.000498459	0.00205881	0.000353145	0.000391892	0	0.0182987	0.000242656	0.00143663	0.000949418	0.000902096	0.000745545	0.00035249	0.00179803	0.00139748	0.0017974	0.00307448	0	0.00163042	0	0	0.00124518	0.000296495	0.000855406	0.00185948	1.1e-05	0	0
TG(16:1_18:1_20:4);TG(18:2/18:2/18:2)	0.11677	0.163368	0.140524	0.103541	0.0442597	0.0770693	0.173749	0.037956	0.125665	0.214438	0.239277	0.260188	0.239013	0.000663022	0.00654521	0.0125692	0.0165948	0.162463	0.0989647	0.0514247	0.127041	0.190535	0.267395	0.0795914	0.100612	0.0249803	0.0923239	0.0841776	0.1424	0.0758914	0.0921837	0.128055	0.0295753	0.0506323	0.120927	0.0201901	0.0196549	0.035392	0.0290367	0.0194232	0.00607717	0.148527	0.0754284	0.0914931	0.106325	9.17e-05	5.23e-05	0.000160629
TG(16:1_18:2_18:3)	0.0157338	0.0389647	0.0395985	0.0040841	0.000575363	0.00106858	0.00884924	0.000929173	0.000955378	0.00184306	0.0871444	0.0977846	0.0948943	0	0	0	0.000150703	0.0225975	0.00193302	0.00150703	0.0167096	0.0301868	0.0584461	0.000454238	0.00250997	0.000343499	0.00364239	0	0.00269056	0.00247308	0.00366449	0.0138262	0.000162354	0.0188461	0.00296977	0	7.2e-05	0	0.00117624	0.000325169	0	0.00333535	0.000591117	0.0116508	0.00180955	6.68e-06	9.42e-06	0
TG(18:0/18:0/18:0)	0.00133305	0.000933162	0.0017877	0.00925663	0.0374364	0.00652443	0.000398429	0.00332898	0.00100666	0.000954607	0.00525673	0.00115921	0.000743426	0.000985446	0.00389702	0.00821267	0.00695075	0.00438823	0.00138914	0.00392605	0.00462	0.00492047	0.00205112	0.00305591	0.00345016	0.00184879	0.00024863	0.0131386	0.0168276	0.00223466	0.00237575	0.00219778	0.00988591	0.00880915	0.00805013	0.0561723	0.00552816	0.00086129	0.0103997	0.00241698	0.00235797	0.0156836	0.0151428	0.00202486	0.000322088	0.000805656	0.00536641	0.00220609
TG(18:0_18:0_18:1)	0.0206304	0.0127035	0.00959183	0.0195669	0.0115127	0.00569538	0.0145645	0.017449	0.0099193	0.0163333	0.0212872	0.0301513	0.0271513	0.00176304	0.0162503	0.0081727	0.0158979	0.0106643	0.00921168	0.0211359	0.00655806	0.0289058	0.00628802	0.0158511	0.00924603	0.0146744	0.0146791	0.00400718	0.0230634	0.0133653	0.022554	0.0112676	0.00461805	0.0120665	0.0120665	0.016195	0.0115173	0.018765	0.00412435	0.00154185	0.000403642	0.00423853	0.00297788	0.0116401	0.0705972	8.32e-05	4.11e-05	0.000165459
TG(18:0_18:0_20:5);TG(18:0_18:1_20:4)	0	0.00230117	0.0019593	0.000469732	0.00131657	0.0023946	0.00224403	0.0111479	0.00357848	0.000101143	0.0158748	0.0110619	0.0136236	0	0	0.000833433	0.000353438	0.0227276	0.00185575	0	0.00104954	0.00293373	0.0088007	0.00115433	0.000947374	0.000518073	0.000149717	0.00110795	0.0029661	0.00131961	0.00132814	0.00202317	0.000490874	0.00306876	0.00220532	0.000668245	0.000661902	0.000584604	0.000437142	0.000907425	0.000219416	0.00370803	0.00132204	0.000535083	0.000635835	0	0	0
TG(18:0_18:1_18:1)	0.0580417	0.053333	0.0352703	0.0620569	0.021395	0.0152317	0.0988755	0.0408064	0.0421718	0.180736	0.0756361	0.101847	0.072787	0.00100267	0.0157792	0.005102	0.0109346	0.0367838	0.0399972	0.0689235	0.0636345	0.0974495	0.0649964	0.0358056	0.0459743	0.00801274	0.0941428	0.0248124	0.062079	0.0441138	0.0554811	0.0654011	0.0171261	0.0336417	0.0337227	0.0141401	0.013566	0.00725812	0.0118045	0.0117992	0.0013969	0.0285229	0.0154747	0.0376079	0.0990117	0.000246833	0.000122757	0.000451148
TG(18:0_18:1_18:2);TG(18:1/18:1/18:1)	0.13083	0.204389	0.0820106	0.105964	0.0698426	0.057832	0.314711	0.0592946	0.0934371	0.299164	0.235777	0.240612	0.151386	0.00170628	0.134217	0.0228952	0.0114698	0.0765561	0.0845409	0.139439	0.112681	0.129989	0.146541	0.159402	0.178414	0.0198616	0.167628	0.0741877	0.187144	0.0677234	0.0644523	0.176263	0.0377807	0.0614203	0.0697	0.00915079	0.0145932	0.0244596	0.0313148	0.0559152	0.00813759	0.0877861	0.0647711	0.071247	0.127926	0.00175436	0.00107286	0.00293385
TG(18:0_18:1_20:1)	0.0119615	0.0172015	0.014161	0.0240098	0.00882208	0.00310166	0.0376947	0.00630759	0.00884565	0.0397413	0.0278164	0.0327792	0.023413	9.29e-05	0.000922933	0.0041142	0.00156551	0.0163026	0.0184167	0.019615	0.0202293	0.0436475	0.0320537	0.00804256	0.0218527	0.0019629	0.0371634	0.00637451	0.0195117	0.0156434	0.0149516	0.0152776	0.00319381	0.0167718	0.0147978	0.00196858	0.0024971	0.00191731	0.00133124	0.0021321	0.000233286	0.00679597	0.00213069	0.0100266	0.0397459	0	0	3.17e-05
TG(18:1_20:1_20:1)	0.0032705	0.0117062	0.00736478	0.00734996	0.00676158	0.00131855	0.0365872	0.00350084	0.00614646	0.00931623	0.0641437	0.0205073	0.0146957	0	9.92e-05	0.00383298	0.000260439	0.0145524	0.00934387	0.0026386	0.00377953	0.0153925	0.0394455	0.00318068	0.0121728	0.000410726	0.00685934	0.00149486	0.0107166	0.00696675	0.00494277	0.00419605	0.00096491	0.0121436	0.00604297	0.00170979	0.00256788	0.000464591	0.000671153	0.00115969	0	0.00516308	0.000857586	0.0040176	0.00987285	0	0	0
TG(18:1_20:4_20:4)	0	0	0	0	0	0	0	0.00648026	0.00242194	0	0	0	0	0.000121667	0	0	0	0	0	0	0	0	0	0	0	0	0	0	0	0	0	0	0	0	0	0	0	0	0.00347099	0	0	0	0	0	0	0	0	0
TG(18:2_18:3_18:3)	0.0293026	0.0686483	0.0542613	0.00670211	0.000282781	0.00307749	0.00694605	0.000308102	0.000759917	0	0.127703	0.149239	0.154085	0	0	0.000250896	0.000111296	0.116516	0.00329494	0.00129704	0.066187	0.0520749	0.133164	0.00145703	0.00596296	0.000704829	0	0.000693275	0.00505407	0.00139025	0.0131475	0.0342984	0.00142266	0.0208531	0.00557011	0.000239022	0.000319139	0	0	0	0	0.00719806	0.000370188	0.0301384	0	0	2e-05	0
TG(48:0)	0.00592833	0.00962261	0.00573967	0.00252035	0.0475967	0.0516171	0.000220463	0.00844666	0.0173722	3.83e-05	0.000118362	0	0.000333253	0.041254	0.0109332	0.00922053	0.00313393	0.00276474	0.00138073	0.000553302	0.00601987	0.00145637	0.000374511	0.00158002	0.00091091	0.0182559	0.000969992	0.000901847	0.00933236	0.0107445	0.00740894	0.000667048	0.000870495	0.00637616	0.00254967	0.103412	0.0298961	0.0443206	0.00306737	0.0204361	0.00487159	0.00590796	0.00801582	0.000472926	0.00115083	0.000261774	0.000183668	0.00110985
TG(54:7)	0.0564793	0.0857819	0.0697161	0.0516643	0.0107892	0.0235288	0.0385983	0.00317066	0.0234009	0.0292852	0.119208	0.115153	0.111098	0.000120208	0.000308024	0.00180572	0.00383186	0.138817	0.0390549	0.00886696	0.115802	0.110111	0.162769	0.0193048	0.0421193	0.00917414	0.0363899	0.0144747	0.0616613	0.0224377	0.0632566	0.0773121	0.00369013	0.0418325	0.0505737	0.00530473	0.00255557	0.00360422	0.00502931	0.00478086	0.000624777	0.0625058	0.0296911	0.051827	0.0130398	3.48e-05	2.47e-05	3.34e-05
TG(58:2)	0.00691141	0.0130419	0.0279333	0.00911825	0.00859326	0.00215003	0.0252999	0.00425903	0.0044946	0.00965121	0.0195775	0.0158306	0.00963149	9.51e-05	0.000276058	0.00465179	0.000528941	0.0133222	0.0166458	0.0067202	0.00765628	0.030473	0.024271	0.0084743	0.0181343	0.000971972	0.0169176	0.00382543	0.031252	0.0103415	0.0100469	0.0255872	0.00112079	0.0161809	0.0179386	0.00224337	0.00777412	0.00218234	0.00044616	0.000943689	0	0.00470951	0.000836398	0.00747847	0.0360863	0	0	0

## Sheet: Table S7
Table S7: Mixed Effect Model for Lipids Results (BH Corrected)
Lipid	p_val_2week	p_val_2month	p_val_6month	Any_Signficant
AC(10:0)	0.00119746	0.00286258	0.00198164	1
AC(12:0)a	2.12133e-05	0.000116933	6.24476e-05	1
AC(12:0)b	2.16687e-06	2.22479e-05	6.16834e-06	1
AC(12:1)	2.16687e-06	1.39088e-05	6.16834e-06	1
AC(14:0)a	0.00018661	0.000420491	6.85939e-05	1
AC(14:0)b	0.0112587	0.0010564	0.000852869	1
AC(14:1)	2.16687e-06	2.88156e-05	6.16834e-06	1
AC(14:2)	0.000131403	0.000434853	0.000416868	1
AC(16:0)	0.265528	0.0494931	0.00490881	1
AC(18:0)	0.927808	0.487922	0.168972	0
AC(18:1)a	0.404395	0.137665	0.0110591	1
AC(18:1)b	0.879219	0.525322	0.22734	0
AC(18:2)	0.0861229	0.0345039	0.00677038	1
AC(24:0)	0.58066	0.181664	0.22734	0
AC(26:0)	0.194781	0.0494931	0.178166	1
CE(18:1)	0.3194	0.694513	0.487313	0
CE(18:2)	0.827378	0.779385	0.673363	0
CE(20:3)	0.904588	0.85703	0.932131	0
CE(22:6)	0.967157	0.591537	0.610871	0
Cer(d16:1/23:0)a	0.989161	0.626194	0.44317	0
Cer(d16:1/23:0)b	0.89625	0.749019	0.0208367	1
Cer(d16:1/24:0);Cer(d18:1/22:0)	0.77985	0.101679	0.00203484	1
Cer(d16:1/24:1);Cer(d18:2/22:0)	0.747206	0.112725	0.0175859	1
Cer(d18:0/22:0)	0.747206	0.0645158	0.000852869	1
Cer(d18:1/16:0)	0.58066	0.00321263	0.00452832	1
Cer(d18:1/18:0)	0.853437	0.0494931	0.00691857	1
Cer(d18:1/20:0)a	0.3194	0.203232	0.960298	0
Cer(d18:1/20:0)b	0.848418	0.118746	0.00490881	1
Cer(d18:1/23:0)a	0.974606	0.794531	0.167066	0
Cer(d18:1/23:0)b	0.603781	0.119992	0.00214234	1
Cer(d18:1/24:0)a	0.991742	0.101679	0.129921	0
Cer(d18:1/24:0)b	0.848418	0.0603268	0.00452832	1
Cer(d18:1/24:1)a	0.967157	0.307182	0.16712	0
Cer(d18:1/24:1)b	0.967157	0.176963	0.0539923	0
Cer(d18:1/25:0)a	0.824069	0.0692713	0.00809699	1
Cer(d18:1/25:0)b	0.813845	0.118746	0.0143374	1
Cer(d18:2/16:0)	0.124473	0.00162591	0.000759668	1
Cer(d18:2/20:0)	0.851136	0.137665	0.00991885	1
Cer(d18:2/24:0)	0.986186	0.153511	0.070535	0
Cer(d18:2/24:1);Cer(d18:1/24:2)	0.879188	0.20064	0.0880557	0
Cer(t18:0/16:0)a	1.57412e-05	5.88818e-05	6.24476e-05	1
Cer(t18:0/16:0)b	2.12133e-05	2.97515e-05	6.24476e-05	1
Cer(t18:0/16:0)c	0.418016	0.612281	0.402279	0
DG(16:0_18:1)	0.686719	0.325242	0.133442	0
DG(16:1_18:1)	0.445628	0.137665	0.133442	0
DG(17:0_20:0)	0.3194	0.964918	0.330487	0
DG(18:0_18:1);DG(16:0_20:1)	0.761175	0.525322	0.133442	0
DG(18:0_18:2)	0.879188	0.75097	0.813986	0
DG(18:0_20:3)	0.649756	0.562184	0.386328	0
DG(18:1_18:1)	0.60872	0.377114	0.0878507	0
DG(18:1_18:2);DG(16:0_20:3)	0.879188	0.675342	0.525447	0
DG(18:2_18:3)	0.576081	0.963271	0.763562	0
DGDG(16:0_16:0)	0.879188	0.489438	0.939999	0
DGDG(16:0_20:1);DGDG(18:0_18:1)	0.761175	0.87893	0.550149	0
DGDG(16:0_20:3)a	0.879188	0.982129	0.408332	0
DGDG(16:0_20:3)b	0.879188	0.842399	0.977905	0
DGDG(16:1_18:0);DGDG(15:0_19:1)	0.904588	0.669848	0.971119	0
DGDG(17:0_17:0)	0.79782	0.91733	0.644252	0
DGDG(17:0_17:2)	0.953925	0.820123	0.758477	0
DGDG(17:0_17:3)	0.989161	0.982129	0.402279	0
DGDG(18:0_18:2);DGDG(18:1_18:1);DGDG(16:0_20:2)	0.967157	0.524485	0.645531	0
DGDG(18:0_18:3)a	0.879188	0.813263	0.502203	0
DGDG(18:0_18:3)b	0.969124	0.717449	0.813986	0
FA 13:0	0.368582	0.725605	0.508129	0
FA 15:0a	5.6999e-05	0.000448347	0.000386132	1
FA 15:0b	0.506595	0.525322	0.612451	0
FA 16:1	0.978981	0.348223	0.19184	0
FA 16:2	0.919013	0.65385	0.657059	0
FA 17:0a	0.816386	0.151179	0.23251	0
FA 17:0b	0.934795	0.00515509	0.140556	1
FA 17:1a	0.375419	0.0758857	0.199162	0
FA 17:1b	0.144285	0.0520656	0.0204521	1
FA 17:2	0.604333	0.717745	0.984444	0
FA 18:3	0.63916	0.715199	0.889531	0
FA 19:0a	0.887051	0.747744	0.68563	0
FA 19:0b	0.93226	0.232649	0.33477	0
FA 19:1a	0.127416	0.000670435	0.00899914	1
FA 19:1b	0.201888	0.00283037	0.0149039	1
FA 19:3	0.851805	0.431983	0.707633	0
FA 20:0a	0.978981	0.137665	0.414703	0
FA 20:3a	0.747206	0.0268706	0.0101409	1
FA 20:3b	0.404395	0.73214	0.240481	0
FA 20:4	0.250983	0.0193639	0.000386132	1
FA 21:0a	0.79782	0.542939	0.900771	0
FA 22:0	0.576081	0.59965	0.909654	0
FA 22:1	0.449179	0.395005	0.746888	0
FA 22:2	0.127416	0.950738	0.229899	0
FA 22:3a	0.631429	0.978719	0.16712	0
FA 22:3b	0.936102	0.619466	0.190881	0
FA 22:4	0.851805	0.0522142	0.289054	0
FA 22:5	0.817278	0.173184	0.00858071	1
FA 22:6	0.087996	0.00078511	0.000157868	1
FA 23:0	0.194781	0.688881	0.291359	0
FA 24:0	0.747206	0.573331	0.872814	0
FA 24:1	0.3194	0.995017	0.494268	0
FA 25:0	0.522394	0.632054	0.681744	0
FA 26:0	0.165729	0.56606	0.236416	0
FAHFA(14:0/O-16:2)	0.978981	0.137137	0.294616	0
FAHFA(16:0/O-18:2)	0.404395	0.0548679	0.068296	0
FAHFA(17:0/O-19:2)	0.853437	0.0345039	0.110891	1
GM3(d18:1/16:0)	0.00018661	5.88818e-05	6.24476e-05	1
GM3(d18:1/18:0)	0.00168586	0.000175028	0.00010562	1
GM3(d18:1/22:0)	0.000244511	0.000116933	6.85939e-05	1
GM3(d18:1/24:0)	0.00119746	0.000157919	0.000126698	1
HexCer(d18:1/22:0)a	0.986186	0.201842	0.363109	0
HexCer(d18:1/22:0)b	0.333677	0.0554335	0.00214621	1
HexCer(d18:1/23:0)a	0.445287	0.118746	0.070535	0
HexCer(d18:1/23:0)b	0.148079	0.0321259	0.000848283	1
HexCer(d18:1/24:0)	0.368582	0.0465495	0.00104132	1
HexCer(d18:1/24:1)	0.506595	0.0388066	0.00490881	1
HexCer(d18:2/22:0)a	0.955578	0.176804	0.0383345	1
HexCer(d18:2/22:0)b	0.48559	0.0648665	0.00452832	1
HexCer(d18:2/24:1)	0.747206	0.133087	0.0175859	1
LPC(0:0/14:0)	0.3194	0.137665	0.0829178	0
LPC(0:0/15:0)	0.150339	0.0548679	0.052895	0
LPC(0:0/16:0)	0.119072	0.0132379	0.0129553	1
LPC(0:0/16:1)	0.445425	0.490747	0.363109	0
LPC(0:0/17:0)	0.3194	0.0465495	0.0383345	1
LPC(0:0/18:0)	0.144285	0.0238285	0.0880557	1
LPC(0:0/18:1)	0.445425	0.950738	0.475205	0
LPC(0:0/18:2)	0.604333	0.689197	0.864937	0
LPC(0:0/18:3)	0.817278	0.80379	0.445565	0
LPC(0:0/20:3)	0.817278	0.400454	0.596772	0
LPC(0:0/20:4)	0.761175	0.373254	0.358117	0
LPC(0:0/22:6)	0.580784	0.400454	0.386328	0
LPC(14:0/0:0)	0.144285	0.00790242	0.0258762	1
LPC(15:0/0:0)	0.411941	0.0388066	0.00490881	1
LPC(16:0/0:0)	0.250983	0.0388066	0.0265343	1
LPC(16:1/0:0)	0.3194	0.176162	0.134334	0
LPC(17:0/0:0)	0.3194	0.0494931	0.0451207	1
LPC(18:0/0:0)	0.506595	0.12611	0.110891	0
LPC(18:1/0:0)	0.3194	0.545931	0.292552	0
LPC(18:2/0:0)	0.63916	0.747744	0.824216	0
LPC(18:3/0:0)	0.967157	0.794531	0.61039	0
LPC(20:0_0:0)	0.863076	0.969775	0.608754	0
LPC(20:2_0:0)	0.48568	0.685407	0.240894	0
LPC(20:3/0:0)	0.761175	0.65385	0.425384	0
LPC(20:4/0:0)	0.747206	0.213161	0.231021	0
LPC(22:5_0:0)	0.695208	0.59965	0.445149	0
LPC(22:6/0:0)	0.17822	0.119992	0.167066	0
LPE(0:0/16:0)	0.747206	0.525322	0.532105	0
LPE(0:0/18:0)	0.989161	0.745304	0.960298	0
LPE(0:0/18:1)	0.719623	0.545931	0.849537	0
LPE(0:0/18:2)	0.994546	0.487922	0.22734	0
LPE(0:0/20:3)	0.603781	0.813263	0.960298	0
LPE(0:0/20:4)	0.728999	0.74401	0.929907	0
LPE(16:0/0:0)	0.824911	0.240759	0.987634	0
LPE(18:0/0:0)	0.194781	0.00322841	0.00659782	1
LPE(18:1/0:0)	0.851805	0.414358	0.2553	0
LPE(18:2/0:0)	0.761175	0.759167	0.528619	0
LPE(20:3_0:0)	0.165122	0.525322	0.718751	0
LPE(20:4/0:0)	0.404395	0.887074	0.798825	0
LPE(O-16:1/0:0)	0.762224	0.183387	0.01952	1
LPE(O-18:1_0:0)	0.879188	0.180822	0.271093	0
LPE(O-18:2_0:0)	0.991742	0.431983	0.0335401	1
LPG(0:0_16:0)	0.448493	0.190176	0.292552	0
LPG(0:0_18:0)	0.346267	0.617243	0.612451	0
LPG(0:0_18:1)	0.747206	0.96772	0.935761	0
LPI(0:0/18:0)	0.0737987	0.0522142	0.0616512	0
LPI(0:0_16:0)	0.3194	0.779385	0.886145	0
LPI(0:0_18:1)	0.346267	0.978719	0.761078	0
LPI(18:0/0:0)	0.276041	0.137665	0.171846	0
MGDG(39:1)a	0.285942	0.0388066	0.00194606	1
MGDG(39:1)b	0.127416	0.0116419	0.00791234	1
PC(14:0_16:0)	0.940532	0.225335	0.070535	0
PC(14:0_20:4)	0.900162	0.618874	0.122289	0
PC(15:0_18:1);PC(16:0_17:1)	0.63916	0.559611	0.550149	0
PC(15:0_18:2)	0.900162	0.73214	0.57054	0
PC(16:0/16:0)	0.991742	0.336793	0.068296	0
PC(16:0_16:1)	0.802806	0.542091	0.400444	0
PC(16:0_18:0)	0.909159	0.402066	0.23026	0
PC(16:0_18:1)	0.47733	0.606098	0.68563	0
PC(16:0_18:2)	0.972008	0.779385	0.358931	0
PC(16:0_18:3)	0.747206	0.118746	0.292552	0
PC(16:0_18:3)a	0.953925	0.515633	0.363109	0
PC(16:0_18:3)b;PC(16:1_18:2)	0.285942	0.525322	0.205643	0
PC(16:0_20:4)	0.815206	0.644296	0.530139	0
PC(16:0_20:4);PC(18:1_18:3)	0.84239	0.932037	0.635539	0
PC(16:0_20:5)	0.863076	0.764365	0.475205	0
PC(16:0_20:5);PC(16:1_20:4)	0.508845	0.580742	1	0
PC(16:0_20:5);PC(18:2_18:3)	0.848418	0.537193	0.601899	0
PC(16:0_22:4)	0.967157	0.820123	0.5535	0
PC(16:0_22:5);PC(18:0_20:5);PC(18:1_20:4)	0.576081	0.506282	0.932457	0
PC(16:0_22:5);PC(18:1_20:4)	0.720906	0.849167	0.564837	0
PC(16:0_22:6)	0.403635	0.559611	0.932457	0
PC(17:0_18:2)a	0.817278	0.59965	0.811768	0
PC(17:0_18:2)b	0.944091	0.75097	0.859473	0
PC(17:0_22:6)	0.714855	0.889799	0.5535	0
PC(18:0_18:1)	0.47733	0.525322	0.402279	0
PC(18:0_18:2)	0.747206	0.489438	0.2553	0
PC(18:0_20:3)	0.747206	0.562184	0.739902	0
PC(18:0_20:4)	0.981546	0.755313	0.864937	0
PC(18:0_20:4)a	0.967494	0.820123	0.551222	0
PC(18:0_20:4)b	0.992957	0.940049	0.5535	0
PC(18:0_22:4)	0.992957	0.618942	0.61039	0
PC(18:0_22:5)a	0.77985	0.978719	0.690572	0
PC(18:0_22:5)b	0.879188	0.626108	0.844857	0
PC(18:0_22:6)	0.498797	0.778757	0.60623	0
PC(18:1/18:1)	0.542157	0.240759	0.139557	0
PC(18:1_18:2)	0.57365	0.163498	0.0270275	1
PC(18:1_18:2);PC(18:0_18:3);PC(16:0_20:3)	0.739606	0.65385	0.596287	0
PC(18:1_20:3);PC(16:0_22:4)	0.418016	0.247785	0.889531	0
PC(18:1_22:6)	0.900162	0.59965	0.932457	0
PC(18:2/18:2)	0.863076	0.3151	0.104494	0
PC(18:2_18:3)	0.992957	0.418281	0.178166	0
PC(18:2_20:4)	0.967351	0.619466	0.813986	0
PC(28:0)	0.845604	0.16844	0.445565	0
PC(32:1)	2.12133e-05	6.57935e-05	6.24476e-05	1
PC(36:0)	0.967157	0.646008	0.558289	0
PC(37:4)	0.957405	0.669848	0.836544	0
PC(37:5)a	0.904588	0.782984	0.960298	0
PC(38:1)	0.498797	0.137665	0.135893	0
PC(38:2)	0.826424	0.52688	0.752522	0
PC(38:5)	0.477764	0.876158	0.977905	0
PC(38:7)a	0.967157	0.820123	0.915933	0
PC(40:6)	0.649756	0.948113	0.886145	0
PC(O-16:0/16:0)	0.967157	0.395005	0.246106	0
PC(O-16:0/20:3)	0.152673	0.524485	0.425384	0
PC(O-16:0/20:4);PC(P-18:0/18:3)	0.848418	0.820123	0.932457	0
PC(O-16:0/20:5);PC(P-16:0/20:4)	0.135765	0.229216	0.869384	0
PC(O-16:0/22:5);PC(P-18:0/20:4)	0.45144	0.66022	0.849537	0
PC(O-16:0/22:6)	0.63916	0.930304	0.758477	0
PC(O-18:0/16:0)	0.900162	0.525322	0.090877	0
PC(O-18:0/20:4)	0.404395	0.661822	0.988223	0
PC(O-18:0/22:4)	0.747206	0.463075	0.402279	0
PC(O-18:0/22:5)	0.695208	0.59965	0.445149	0
PC(P-16:0/16:0)	0.00593751	0.0566648	0.0299152	1
PC(P-16:0/18:1)	0.382923	0.950228	0.844857	0
PC(P-16:0/18:1);PC(P-18:0/16:1)	0.0118452	0.0489925	0.33477	1
PC(P-18:0/16:0)	0.972008	0.745304	0.0720028	0
PC(P-18:0/20:4)	0.853437	0.658633	0.750878	0
PE(16:0/16:0)	0.285942	0.137124	0.19184	0
PE(16:0_18:0)	0.477764	0.395005	0.299767	0
PE(16:0_18:1)	0.339385	0.580742	0.960298	0
PE(16:0_18:1)a	0.747206	0.749774	0.530139	0
PE(16:0_18:1)b	9.98234e-05	9.77072e-05	6.24476e-05	1
PE(16:0_18:2)	0.728999	1	0.167066	0
PE(16:0_18:3)	0.448493	0.163498	0.0122883	1
PE(16:0_20:4);PE(18:2/18:2)	0.144285	0.0574143	0.0322743	1
PE(16:0_22:5);PE(18:1_20:4)a	0.194781	0.455844	0.135893	0
PE(16:0_22:5);PE(18:1_20:4)b	0.265528	0.932037	0.932457	0
PE(16:0_22:6)	0.339385	0.487922	0.999783	0
PE(17:1_18:0)a	0.58066	0.950738	0.567799	0
PE(17:1_18:0)b	4.80889e-05	0.000477059	0.000164284	1
PE(18:0_18:1)	0.47733	0.813263	0.844019	0
PE(18:0_18:2);PE(18:1/18:1)	0.904588	0.820123	0.986743	0
PE(18:0_20:4)	0.750453	0.749774	0.960298	0
PE(18:1_18:2)	0.967157	0.658449	0.133442	0
PE(18:1_18:2)a	0.904588	0.501903	0.179243	0
PE(32:1)a	0.477764	0.580742	0.898658	0
PE(32:1)b	0.0469035	0.133087	0.0302084	1
PE(O-16:0/20:4)	0.562648	0.685385	0.926062	0
PE(O-18:0/20:4)	0.495733	0.270978	0.61039	0
PE(P-16:0/18:1)	0.319819	0.0347053	0.140556	1
PE(P-16:0/18:2)	0.947862	0.747744	0.635712	0
PE(P-16:0/20:2)	0.404395	0.136866	0.472472	0
PE(P-16:0/20:3)	0.57365	0.484964	0.932131	0
PE(P-16:0/20:4)	0.428954	0.590668	0.813986	0
PE(P-16:0/22:4)	0.144285	0.135779	0.494922	0
PE(P-16:0/22:5)	0.150566	0.377114	0.889723	0
PE(P-16:0/22:6)	0.747206	0.668214	1	0
PE(P-18:0/18:1)	0.967157	0.964918	0.612451	0
PE(P-18:0/18:2)	0.747206	0.348223	0.260559	0
PE(P-18:0/20:3)	0.445628	0.606098	0.960298	0
PE(P-18:0/20:4)	0.631429	0.526525	0.292552	0
PE(P-18:0/20:5)	0.250983	0.129681	0.133945	0
PE(P-18:0/22:4)	0.0762121	0.211781	0.758477	0
PE(P-18:0/22:5)	0.0861229	0.176963	0.612451	0
PE(P-18:0/22:6)	0.963951	0.392208	0.240894	0
PG(14:0_16:0)	0.542157	0.395005	0.0718041	0
PG(14:0_18:1);PG(16:0_16:1)	0.747206	0.170821	0.135755	0
PG(15:0_16:0)	0.0295179	0.00816505	0.0211434	1
PG(15:0_18:1)	0.967157	0.368651	0.551222	0
PG(15:0_18:3)	0.728999	0.559611	1	0
PG(15:0_20:4)	1	1	1	0
PG(16:0/16:0)	0.5907	0.463075	0.746218	0
PG(16:0_17:1)	0.603781	0.0903062	0.129921	0
PG(16:0_18:0)	0.0762121	0.00522392	0.034512	1
PG(16:0_18:1)	0.335249	0.20064	0.450023	0
PG(16:0_18:2)	0.190375	0.133087	0.0299152	1
PG(16:0_19:1);PG(17:0_18:1)	0.124473	0.118746	0.0204521	1
PG(16:0_20:3)a	0.662147	0.836817	0.53484	0
PG(16:1_17:1)	0.0762121	0.525322	0.131309	0
PG(16:1_18:1);PG(17:1/17:1)	0.0762121	0.118755	0.292552	0
PG(17:0_18:2);PG(17:1_18:1)	0.972008	0.75097	0.402279	0
PG(18:0/18:0)	0.307449	0.0385784	0.00904712	1
PG(18:0_18:1);PG(16:0_20:1)	0.0628832	0.00142833	0.0162984	1
PG(18:0_18:3);PG(16:0_20:3)b;PG(18:1_18:2)	0.194781	0.0903062	0.0500847	0
PG(18:0_20:2);PG(18:2_20:0)	0.77985	0.689197	0.844857	0
PG(18:1_20:1)	0.00456124	0.00017566	0.000425798	1
PG(18:1_22:6);PG(18:3_22:4)	0.761175	0.829072	0.782778	0
PG(18:2_19:0)	0.345282	0.0574143	0.391111	0
PG(20:4/20:4)	0.782046	0.74401	0.343029	0
PG(34:1)	0.404395	0.225335	0.420511	0
PG(36:2)	0.335249	0.225335	0.246106	0
PG(36:6)	0.991742	0.161274	0.140451	0
PG(38:4)	0.939246	0.531215	0.109511	0
PG(41:6)	0.967157	0.781197	0.445565	0
PG(46:6)	0.411941	0.762043	0.475205	0
PI(14:0_18:0);PI(16:0/16:0)	0.879219	0.849688	0.470727	0
PI(16:0_16:1)	0.989425	0.889799	0.746888	0
PI(16:0_18:1)	0.946928	0.782984	0.433924	0
PI(16:0_18:2)	0.619005	0.910841	0.445565	0
PI(16:0_20:3)	0.967157	0.484828	0.408332	0
PI(16:0_20:4)	0.904588	0.617243	0.22734	0
PI(16:0_22:3)	0.935653	0.781197	0.822163	0
PI(17:0_20:4)	0.504698	0.91733	0.813986	0
PI(18:0_18:1)	0.879188	0.8332	0.835414	0
PI(18:0_18:2);PI(18:1/18:1)	0.879219	0.617243	0.528619	0
PI(18:0_20:3)	0.84239	0.567523	0.240481	0
PI(18:0_22:4)	0.935696	0.820123	0.657059	0
PI(18:0_22:6)	0.879188	0.91733	0.558289	0
PI(18:1_18:2);PI(18:0_18:3)	0.58066	0.978719	0.596772	0
PI(18:1_20:3);PI(18:0_20:4)	0.904588	0.619466	0.314026	0
PI(18:1_20:4)	0.403635	0.618874	0.951183	0
PS(16:1_22:1)	0.330779	0.484964	0.241077	0
PS(18:0_20:0)	0.382923	0.097745	0.139557	0
PS(18:0_22:3)	0.879188	0.840458	0.229899	0
PS(38:1)	0.63916	0.501903	0.980154	0
SM(d16:1/16:0);SM(d18:1/14:0)	0.879188	0.618874	0.116852	0
SM(d16:1/24:1);SM(d18:1/22:1);SM(d18:2/22:0)	0.81713	0.484828	0.0796199	0
SM(d17:0/18:1)	0.418016	0.106291	0.00649859	1
SM(d17:1/16:0)	0.967157	0.501903	0.103934	0
SM(d17:1/24:0);SM(d18:1/23:0)	0.412184	0.119992	0.00452832	1
SM(d18:0/18:0)	0.900162	0.0726275	0.0122883	1
SM(d18:0/18:1)	0.5907	0.115742	0.00715577	1
SM(d18:1/16:0)	0.3194	0.00325717	0.00062511	1
SM(d18:1/18:0)	0.91677	0.449828	0.0499466	1
SM(d18:1/18:3)	0.335249	0.00567404	0.00192363	1
SM(d18:1/20:0)	0.92216	0.262017	0.035717	1
SM(d18:1/22:0)	0.761175	0.0950603	0.00139839	1
SM(d18:1/24:0)	0.678077	0.11548	0.00194606	1
SM(d18:1/24:1)	0.739606	0.137665	0.0035389	1
SM(d18:2/16:0)	0.853437	0.617243	0.0275501	1
SM(d18:2/18:0)	0.783155	0.348223	0.0143374	1
SM(d32:0)	0.77985	0.391893	0.19184	0
SM(d32:1)	0.991742	0.525322	0.33463	0
SM(d34:1)a	0.851805	0.978719	0.350033	0
SM(d34:1)b	0.946928	0.0950603	0.00809699	1
SM(d38:1)	0.3194	0.0281432	0.00395485	1
SM(d40:0)	0.802806	0.129681	0.0193202	1
SM(d41:1)	0.0140957	0.015955	0.00490881	1
SM(d41:2)	0.817278	0.617243	0.179243	0
SM(d42:3)	0.851805	0.395005	0.0211434	1
SQDG(16:0_18:3)	0.879188	0.978719	0.511236	0
SQDG(16:1_18:1)	0.277569	0.0312784	0.101336	1
SQDG(18:0_18:2)	0.357652	0.617243	0.912277	0
SQDG(18:2_18:3)	0.879219	0.880364	0.644252	0
SQDG(18:3_18:3)	0.223605	0.449828	0.782778	0
TG(12:0_12:0_18:1);TG(12:0_14:0_16:1);TG(12:0_14:1_16:0)	0.939246	0.617243	0.718751	0
TG(12:0_14:0_18:1);TG(12:0_16:0_16:1)	0.879188	0.580742	0.813986	0
TG(12:0_14:0_18:2);TG(12:0_16:1_16:1)	0.344252	0.287647	0.402279	0
TG(12:0_16:0_18:1);TG(14:0_14:0_18:1);TG(14:0_16:0_16:1)	0.603781	0.204193	0.859473	0
TG(12:0_16:1_18:1);TG(14:0_14:0_18:2);TG(14:0_16:1_16:1)	0.827378	0.392208	0.402279	0
TG(14:0_14:0_16:0);TG(12:0_16:0_16:0)	0.927808	0.204193	0.402279	0
TG(14:0_16:0_16:0)	0.404395	0.836817	0.2553	0
TG(14:0_16:0_17:0)	0.989161	0.618874	0.598232	0
TG(14:0_16:0_17:1)	0.848418	0.133087	0.402279	0
TG(14:0_16:0_18:1);TG(16:0_16:0_16:1)	0.445628	0.422968	1	0
TG(14:0_16:0_18:2);TG(14:0_16:1_18:1);TG(16:0_16:1_16:1)	0.996663	0.12611	0.293586	0
TG(14:0_16:1_18:2)	0.404395	0.225335	0.0599791	0
TG(14:0_18:1_18:1);TG(16:0_16:0_18:2)	0.339385	0.950756	0.657059	0
TG(14:0_18:1_18:2);TG(16:1_16:1_18:1)	0.967157	0.484828	0.556427	0
TG(14:0_18:3_18:3)	0.904588	0.813263	0.167066	0
TG(15:0_16:0_18:1);TG(15:0_17:0_17:1)	0.853437	0.567523	0.929907	0
TG(15:0_16:0_18:2);TG(15:0_16:1_18:1)	0.904588	0.580742	0.889531	0
TG(15:0_16:0_20:3);TG(16:0_17:1_18:2)	0.513409	0.631848	0.564837	0
TG(16:0_16:0_18:0)	0.382923	0.846982	0.22734	0
TG(16:0_16:0_18:1)	0.695208	0.749774	0.715741	0
TG(16:0_16:1_20:4);TG(16:0_18:2_18:3)	0.991742	0.944928	0.64173	0
TG(16:0_17:0_18:1)	0.953925	0.617243	1	0
TG(16:0_17:0_18:2);TG(16:0_17:1_18:1)	0.649756	0.637688	0.649184	0
TG(16:0_18:0_18:0)	0.382923	0.989721	0.445565	0
TG(16:0_18:0_18:1)	0.655769	0.65385	0.350862	0
TG(16:0_18:0_18:2);TG(16:0_18:1_18:1)	0.498797	0.999946	0.798825	0
TG(16:0_18:0_19:1)	0.946928	0.72422	0.73119	0
TG(16:0_18:1_18:2)	0.879219	0.849167	0.870626	0
TG(16:0_18:1_18:3);TG(16:0_18:2_18:2)	0.919013	0.91733	0.948237	0
TG(16:0_18:1_20:4);TG(18:1_18:2_18:2)	0.747206	0.963271	0.895598	0
TG(16:0_18:2_19:0)	0.418016	0.490747	0.425184	0
TG(16:0_18:3_22:4);TG(18:1_18:2_20:4)	0.904588	0.999946	0.728394	0
TG(16:0_20:2_22:4);TG(18:0_18:0_22:6)	0.91677	0.618874	0.66697	0
TG(16:1_16:1_18:2)	0.662147	0.589965	0.109511	0
TG(16:1_18:1_20:4);TG(18:2/18:2/18:2)	0.649756	0.999946	0.94767	0
TG(16:1_18:2_18:3)	0.817278	0.849167	0.612451	0
TG(18:0/18:0/18:0)	0.418016	0.820123	0.934591	0
TG(18:0_18:0_18:1)	0.853437	0.716301	0.402279	0
TG(18:0_18:0_20:5);TG(18:0_18:1_20:4)	0.58066	0.501903	0.407155	0
TG(18:0_18:1_18:1)	0.879188	0.644296	0.720975	0
TG(18:0_18:1_18:2);TG(18:1/18:1/18:1)	0.963951	0.935005	0.898658	0
TG(18:0_18:1_20:1)	0.642268	0.689197	0.635539	0
TG(18:1_20:1_20:1)	0.817278	0.65385	0.532105	0
TG(18:1_20:4_20:4)	0.902459	0.963271	0.889723	0
TG(18:2_18:3_18:3)	0.902459	0.487922	0.350862	0
TG(48:0)	0.309169	0.594045	0.0586093	0
TG(54:7)	0.63916	0.985874	0.915933	0
TG(58:2)	0.817494	0.618874	0.704575	0

## Sheet: Table S8
Table S8: Maaslin2 PrePost Results
feature	metadata	value	coef	stderr	N	N.not.0	pval	qval
AC.12.1.	prepost	Post	-6.23242	0.625642	45	45	2.28176e-11	9.03578e-09
AC.12.0.b	prepost	Post	-4.84955	0.493076	45	45	3.25541e-11	1.28914e-08
AC.14.1.	prepost	Post	-3.79917	0.388294	45	45	6.65304e-11	2.6346e-08
Cer.t18.0.16.0.b	prepost	Post	4.65139	0.540706	45	45	8.0993e-10	3.20732e-07
Cer.t18.0.16.0.a	prepost	Post	6.94727	0.813612	45	45	1.02623e-09	4.06388e-07
PC.32.1.	prepost	Post	-2.96189	0.341929	45	45	1.33632e-09	5.29183e-07
AC.12.0.a	prepost	Post	-2.42062	0.292827	45	45	2.22799e-09	8.82283e-07
PE.16.0_18.1.b	prepost	Post	-5.55845	0.642835	45	45	3.07352e-09	1.21711e-06
GM3.d18.1.16.0.	prepost	Post	-3.68858	0.462776	45	45	7.05908e-09	2.7954e-06
GM3.d18.1.22.0.	prepost	Post	-4.26895	0.560054	45	45	1.56685e-08	6.20471e-06
PE.17.1_18.0.b	prepost	Post	-4.52103	0.583107	45	45	1.90224e-08	7.53286e-06
FA.15.0a	prepost	Post	3.78177	0.550345	45	45	1.97474e-08	7.81995e-06
AC.14.0.a	prepost	Post	-5.2397	0.711321	45	45	2.14996e-08	8.51384e-06
AC.14.2.	prepost	Post	-1.87238	0.27799	45	45	3.11306e-08	1.23277e-05
GM3.d18.1.24.0.	prepost	Post	-4.22835	0.599678	45	45	7.29888e-08	2.89036e-05
GM3.d18.1.18.0.	prepost	Post	-4.32309	0.624929	45	45	1.05808e-07	4.18999e-05
PG.18.1_20.1.	prepost	Post	3.48356	0.542866	45	45	3.32294e-07	0.000131589
AC.10.0.	prepost	Post	-1.89976	0.330884	45	45	8.68112e-07	0.000343772
AC.14.0.b	prepost	Post	-3.7926	0.651335	45	45	1.73831e-06	0.00068837
SM.d41.1.	prepost	Post	-2.25097	0.441707	45	45	1.78661e-05	0.00707496
Cer.d18.2.16.0.	prepost	Post	-2.54214	0.508838	45	45	2.05394e-05	0.0081336
FA.22.6	prepost	Post	-2.61846	0.518574	45	45	2.2624e-05	0.0089591
PG.18.0_18.1..PG.16.0_20.1.	prepost	Post	1.42943	0.301381	45	45	4.1284e-05	0.0163485
PG.15.0_16.0.	prepost	Post	2.42222	0.515037	45	45	5.29676e-05	0.0209752
FA.19.1a	prepost	Post	-1.2513	0.27137	45	45	6.41134e-05	0.0253889
PC.P.16.0.16.0.	prepost	Post	1.74678	0.393708	45	45	0.00010298	0.04078
AC.18.2.	prepost	Post	-2.16403	0.497505	45	45	0.000128289	0.0508024
PG.16.0_18.0.	prepost	Post	1.32008	0.302255	45	45	0.00013218	0.0523432
HexCer.d18.1.23.0.b	prepost	Post	-2.41937	0.577182	45	45	0.000135295	0.0535769
LPE.18.0.0.0.	prepost	Post	-2.1634	0.499052	45	45	0.000144817	0.0573474
MGDG.39.1.b	prepost	Post	-1.6254	0.378365	45	45	0.000146487	0.0580089
LPC.0.0.16.0.	prepost	Post	-2.57011	0.594498	45	45	0.000149041	0.0590202
SM.d18.1.16.0.	prepost	Post	-2.17466	0.518177	45	45	0.000234325	0.0927926
LPC.14.0.0.0.	prepost	Post	-2.69247	0.652176	45	45	0.000258666	0.102432
FA.19.1b	prepost	Post	-1.10459	0.270126	45	45	0.000283556	0.112288
SM.d18.1.18.3.	prepost	Post	-1.47271	0.361488	45	45	0.000314382	0.124495
FA.20.4	prepost	Post	-1.54997	0.378485	45	45	0.000318223	0.126016
MGDG.39.1.a	prepost	Post	-1.81626	0.471595	45	45	0.000520225	0.206009
FA.17.1b	prepost	Post	-2.18293	0.55489	45	45	0.000523119	0.207155
SM.d38.1.	prepost	Post	-1.78875	0.463971	45	45	0.0005456	0.216058
LPI.0.0.18.0.	prepost	Post	-3.52255	0.943088	45	45	0.000547555	0.216832
AC.16.0.	prepost	Post	-2.44724	0.645391	45	45	0.000623754	0.247007
HexCer.d18.1.24.0.	prepost	Post	-2.18381	0.603422	45	45	0.000773395	0.306265
LPC.0.0.18.0.	prepost	Post	-2.04321	0.547994	45	45	0.000779857	0.308823
PE.32.1.b	prepost	Post	-2.8707	0.775816	45	45	0.000780707	0.30916
PE.16.0_20.4..PE.18.2.18.2.	prepost	Post	1.25599	0.338406	45	45	0.000787121	0.3117
PG.18.0.18.0.	prepost	Post	-1.73169	0.469738	45	45	0.00083385	0.330205
PG.16.0_19.1..PG.17.0_18.1.	prepost	Post	-1.47883	0.405021	45	45	0.000948707	0.375688
HexCer.d18.1.22.0.b	prepost	Post	-2.187	0.609239	45	45	0.00101192	0.40072
LPC.16.0.0.0.	prepost	Post	-1.42389	0.39349	45	45	0.00101743	0.402902
LPC.0.0.15.0.	prepost	Post	-1.0168	0.27967	45	45	0.0010605	0.419959
PC.P.16.0.18.1..PC.P.18.0.16.1.	prepost	Post	1.67514	0.468733	45	45	0.00116678	0.462046
Cer.d18.1.16.0.	prepost	Post	-1.0932	0.310899	45	45	0.00133573	0.52895
LPC.15.0.0.0.	prepost	Post	-1.38954	0.397318	45	45	0.00145177	0.574902
PG.18.0_18.3..PG.16.0_20.3.b.PG.18.1_18.2.	prepost	Post	-1.80395	0.529013	45	45	0.00178451	0.706664
PG.16.0_18.2.	prepost	Post	-1.82346	0.538927	45	45	0.00191405	0.757964
LPC.0.0.17.0.	prepost	Post	-2.2959	0.681245	45	45	0.00201607	0.798363
LPC.17.0.0.0.	prepost	Post	-1.88715	0.564085	45	45	0.00214476	0.849324
SQDG.16.1_18.1.	prepost	Post	-1.38992	0.41467	45	45	0.00221236	0.876095
HexCer.d18.1.24.1.	prepost	Post	-2.31123	0.706653	45	45	0.00243897	0.965833
AC.18.0.	prepost	Post	-0.656781	0.460994	45	45	0.163908	1
AC.18.1.a	prepost	Post	-1.67955	0.545339	45	45	0.00423323	1
AC.18.1.b	prepost	Post	-0.626823	0.452794	45	45	0.1761	1
AC.24.0.	prepost	Post	0.550581	0.251959	45	45	0.036458	1
AC.26.0.	prepost	Post	0.80012	0.248886	45	45	0.00299057	1
CE.18.1.	prepost	Post	0.0843217	0.521187	45	45	0.872481	1
CE.18.2.	prepost	Post	-0.133882	0.699914	45	45	0.849525	1
CE.20.3.	prepost	Post	0.0615891	0.600463	45	45	0.918985	1
CE.22.6.	prepost	Post	-0.672807	0.815405	45	45	0.413857	1
Cer.d16.1.23.0.a	prepost	Post	-0.0675284	0.526709	45	45	0.898761	1
Cer.d16.1.23.0.b	prepost	Post	-0.707269	0.451733	45	45	0.127133	1
Cer.d16.1.24.0..Cer.d18.1.22.0.	prepost	Post	-0.960654	0.351878	45	45	0.0103117	1
Cer.d16.1.24.1..Cer.d18.2.22.0.	prepost	Post	-1.12643	0.430712	45	45	0.0138486	1
Cer.d18.0.22.0.	prepost	Post	-1.01112	0.346123	45	45	0.00650938	1
Cer.d18.1.18.0.	prepost	Post	-0.815937	0.300352	45	45	0.0105219	1
Cer.d18.1.20.0.a	prepost	Post	1.07818	0.594171	45	45	0.0787247	1
Cer.d18.1.20.0.b	prepost	Post	-0.959298	0.374745	45	45	0.0154136	1
Cer.d18.1.23.0.a	prepost	Post	-0.559631	0.552795	45	45	0.319011	1
Cer.d18.1.23.0.b	prepost	Post	-1.1411	0.386399	45	45	0.00594923	1
Cer.d18.1.24.0.a	prepost	Post	-0.826576	0.458578	45	45	0.0806979	1
Cer.d18.1.24.0.b	prepost	Post	-1.13547	0.424083	45	45	0.0117262	1
Cer.d18.1.24.1.a	prepost	Post	-0.597487	0.446129	45	45	0.190448	1
Cer.d18.1.24.1.b	prepost	Post	-0.639654	0.388356	45	45	0.110476	1
Cer.d18.1.25.0.a	prepost	Post	-1.40113	0.529559	45	45	0.0113368	1
Cer.d18.1.25.0.b	prepost	Post	-0.950732	0.37656	45	45	0.0167464	1
Cer.d18.2.20.0.	prepost	Post	-1.11663	0.456153	45	45	0.0198398	1
Cer.d18.2.24.0.	prepost	Post	-0.630797	0.372305	45	45	0.10126	1
Cer.d18.2.24.1..Cer.d18.1.24.2.	prepost	Post	-0.755019	0.381321	45	45	0.057698	1
Cer.t18.0.16.0.c	prepost	Post	0.77118	0.458172	45	45	0.101984	1
DG.16.0_18.1.	prepost	Post	-0.734436	0.363967	45	45	0.0516203	1
DG.16.1_18.1.	prepost	Post	-1.20071	0.466339	45	45	0.014783	1
DG.17.0_20.0.	prepost	Post	0.691774	0.502622	45	45	0.178105	1
DG.18.0_18.1..DG.16.0_20.1.	prepost	Post	-1.10083	0.658958	45	45	0.102074	1
DG.18.0_18.2.	prepost	Post	-0.164215	0.555382	45	45	0.768899	1
DG.18.0_20.3.	prepost	Post	-0.890991	0.601589	45	45	0.145881	1
DG.18.1_18.1.	prepost	Post	-1.02171	0.485839	45	45	0.0432092	1
DG.18.1_18.2..DG.16.0_20.3.	prepost	Post	-0.337155	0.344819	45	45	0.33595	1
DG.18.2_18.3.	prepost	Post	-0.255511	0.600218	45	45	0.673196	1
DGDG.16.0_16.0.	prepost	Post	-0.116247	0.305601	45	45	0.706226	1
DGDG.16.0_20.1..DGDG.18.0_18.1.	prepost	Post	0.287058	0.4597	45	45	0.536636	1
DGDG.16.0_20.3.a	prepost	Post	-0.346362	0.490626	45	45	0.485408	1
DGDG.16.0_20.3.b	prepost	Post	-0.190519	0.537518	45	45	0.725405	1
DGDG.16.1_18.0..DGDG.15.0_19.1.	prepost	Post	-0.0415068	0.336904	45	45	0.902706	1
DGDG.17.0_17.0.	prepost	Post	0.306338	0.411314	45	45	0.461698	1
DGDG.17.0_17.2.	prepost	Post	-0.190085	0.365341	45	45	0.606598	1
DGDG.17.0_17.3.	prepost	Post	-0.232329	0.463794	45	45	0.620075	1
DGDG.18.0_18.2..DGDG.18.1_18.1..DGDG.16.0_20.2.	prepost	Post	-0.420634	0.478272	45	45	0.385484	1
DGDG.18.0_18.3.a	prepost	Post	-0.487741	0.570321	45	45	0.398831	1
DGDG.18.0_18.3.b	prepost	Post	-0.223912	0.427335	45	45	0.604004	1
FA.13.0	prepost	Post	0.490615	0.325196	45	45	0.143473	1
FA.15.0b	prepost	Post	0.106496	0.258118	45	45	0.682539	1
FA.16.1	prepost	Post	-0.224277	0.170874	45	45	0.198297	1
FA.16.2	prepost	Post	-0.186883	0.399705	45	45	0.643203	1
FA.17.0a	prepost	Post	-0.408207	0.336687	45	45	0.233805	1
FA.17.0b	prepost	Post	-0.505468	0.214639	45	45	0.0231582	1
FA.17.1a	prepost	Post	-1.10733	0.409482	45	45	0.00976904	1
FA.17.2	prepost	Post	-0.332521	0.38755	45	45	0.397066	1
FA.18.3	prepost	Post	-0.257029	0.273516	45	45	0.354094	1
FA.19.0a	prepost	Post	-0.105453	0.328338	45	45	0.750238	1
FA.19.0b	prepost	Post	-0.304918	0.255309	45	45	0.241064	1
FA.19.3	prepost	Post	-0.204674	0.356861	45	45	0.570222	1
FA.20.0a	prepost	Post	-0.214601	0.161875	45	45	0.194129	1
FA.20.3a	prepost	Post	-0.796125	0.270668	45	45	0.0061095	1
FA.20.3b	prepost	Post	0.21111	0.608155	45	45	0.730718	1
FA.21.0a	prepost	Post	-0.045006	0.208482	45	45	0.830454	1
FA.22.0	prepost	Post	0.0420238	0.165289	45	45	0.800898	1
FA.22.1	prepost	Post	-0.0201233	0.290596	45	45	0.945242	1
FA.22.2	prepost	Post	0.775821	0.438265	45	45	0.0862928	1
FA.22.3a	prepost	Post	0.547953	0.446827	45	45	0.228988	1
FA.22.3b	prepost	Post	0.234075	0.523324	45	45	0.657834	1
FA.22.4	prepost	Post	-0.545805	0.266651	45	45	0.0491346	1
FA.22.5	prepost	Post	-0.983489	0.408725	45	45	0.0221	1
FA.23.0	prepost	Post	0.289597	0.144754	45	45	0.0535771	1
FA.24.0	prepost	Post	0.0126382	0.156993	45	45	0.936333	1
FA.24.1	prepost	Post	0.177043	0.131994	45	45	0.189544	1
FA.25.0	prepost	Post	0.279485	0.220046	45	45	0.21314	1
FA.26.0	prepost	Post	0.455371	0.199053	45	45	0.0284828	1
FAHFA.14.0.O.16.2.	prepost	Post	-0.680976	0.442384	45	45	0.13105	1
FAHFA.16.0.O.18.2.	prepost	Post	-1.99829	0.655162	45	45	0.00472316	1
FAHFA.17.0.O.19.2.	prepost	Post	-1.14227	0.480812	45	45	0.0238451	1
HexCer.d18.1.22.0.a	prepost	Post	-0.555009	0.425441	45	45	0.201495	1
HexCer.d18.1.23.0.a	prepost	Post	-1.28317	0.463496	45	45	0.00925673	1
HexCer.d18.2.22.0.a	prepost	Post	-1.19809	0.609581	45	45	0.0574371	1
HexCer.d18.2.22.0.b	prepost	Post	-1.8273	0.56643	45	45	0.00282141	1
HexCer.d18.2.24.1.	prepost	Post	-1.7795	0.703723	45	45	0.0162004	1
LPC.0.0.14.0.	prepost	Post	-1.11719	0.394252	45	45	0.00872051	1
LPC.0.0.16.1.	prepost	Post	-0.3925	0.212231	45	45	0.0765902	1
LPC.0.0.18.1.	prepost	Post	-0.814015	0.663695	45	45	0.229543	1
LPC.0.0.18.2.	prepost	Post	-0.708183	0.717798	45	45	0.331016	1
LPC.0.0.18.3.	prepost	Post	0.324286	0.331114	45	45	0.334216	1
LPC.0.0.20.3.	prepost	Post	-0.338127	0.259759	45	45	0.203368	1
LPC.0.0.20.4.	prepost	Post	-0.373555	0.236002	45	45	0.120784	1
LPC.0.0.22.6.	prepost	Post	-0.657033	0.369371	45	45	0.0894186	1
LPC.16.1.0.0.	prepost	Post	-1.52495	0.558592	45	45	0.0107417	1
LPC.18.0.0.0.	prepost	Post	-1.18084	0.459924	45	45	0.0151853	1
LPC.18.1.0.0.	prepost	Post	-0.96404	0.472359	45	45	0.0497054	1
LPC.18.2.0.0.	prepost	Post	-0.576401	0.618382	45	45	0.356483	1
LPC.18.3.0.0.	prepost	Post	0.458102	0.767832	45	45	0.554838	1
LPC.20.0_0.0.	prepost	Post	0.026583	0.554976	45	45	0.96212	1
LPC.20.2_0.0.	prepost	Post	-0.950401	0.571083	45	45	0.106236	1
LPC.20.3.0.0.	prepost	Post	-0.388142	0.318735	45	45	0.232765	1
LPC.20.4.0.0.	prepost	Post	-0.97204	0.508549	45	45	0.0658824	1
LPC.22.5_0.0.	prepost	Post	-0.335628	0.245098	45	45	0.18521	1
LPC.22.6.0.0.	prepost	Post	-1.68259	0.55084	45	45	0.00472896	1
LPE.0.0.16.0.	prepost	Post	0.114351	0.529	45	45	0.830156	1
LPE.0.0.18.0.	prepost	Post	-0.147347	0.763002	45	45	0.848115	1
LPE.0.0.18.1.	prepost	Post	-0.389267	0.364057	45	45	0.292828	1
LPE.0.0.18.2.	prepost	Post	0.536152	0.471864	45	45	0.264787	1
LPE.0.0.20.3.	prepost	Post	0.14639	0.37325	45	45	0.696844	1
LPE.0.0.20.4.	prepost	Post	0.111086	0.466839	45	45	0.813338	1
LPE.16.0.0.0.	prepost	Post	-0.108828	0.23855	45	45	0.651285	1
LPE.18.1.0.0.	prepost	Post	-0.588155	0.380144	45	45	0.131393	1
LPE.18.2.0.0.	prepost	Post	-0.11957	0.509784	45	45	0.816137	1
LPE.20.3_0.0.	prepost	Post	0.91104	0.483706	45	45	0.0688579	1
LPE.20.4.0.0.	prepost	Post	0.250055	0.539041	45	45	0.645726	1
LPE.O.16.1.0.0.	prepost	Post	-0.883288	0.371671	45	45	0.0236465	1
LPE.O.18.1_0.0.	prepost	Post	-0.635953	0.36981	45	45	0.0950855	1
LPE.O.18.2_0.0.	prepost	Post	-0.743051	0.455259	45	45	0.112569	1
LPG.0.0_16.0.	prepost	Post	-0.868607	0.388549	45	45	0.0325513	1
LPG.0.0_18.0.	prepost	Post	0.472345	0.297111	45	45	0.122016	1
LPG.0.0_18.1.	prepost	Post	0.167382	0.383105	45	45	0.665048	1
LPI.0.0_16.0.	prepost	Post	-0.817436	0.659179	45	45	0.224106	1
LPI.0.0_18.1.	prepost	Post	-0.437565	0.407753	45	45	0.291462	1
LPI.18.0.0.0.	prepost	Post	-1.86886	0.663211	45	45	0.00838059	1
PC.14.0_16.0.	prepost	Post	-0.818967	0.441835	45	45	0.0735227	1
PC.14.0_20.4.	prepost	Post	0.517482	0.348969	45	45	0.148608	1
PC.15.0_18.1..PC.16.0_17.1.	prepost	Post	-0.0610383	0.0443036	45	45	0.178103	1
PC.15.0_18.2.	prepost	Post	0.305999	0.751771	45	45	0.686808	1
PC.16.0.16.0.	prepost	Post	-0.608541	0.380362	45	45	0.119852	1
PC.16.0_16.1.	prepost	Post	-0.629375	0.467049	45	45	0.188173	1
PC.16.0_18.0.	prepost	Post	-0.579232	0.393614	45	45	0.151508	1
PC.16.0_18.1.	prepost	Post	0.460571	0.330652	45	45	0.173734	1
PC.16.0_18.2.	prepost	Post	0.41332	0.513108	45	45	0.426874	1
PC.16.0_18.3.	prepost	Post	-0.762541	0.376211	45	45	0.0512368	1
PC.16.0_18.3.a	prepost	Post	0.624431	0.666636	45	45	0.355535	1
PC.16.0_18.3.b.PC.16.1_18.2.	prepost	Post	-1.2966	0.582713	45	45	0.0338879	1
PC.16.0_20.4.	prepost	Post	-0.640388	0.58985	45	45	0.285531	1
PC.16.0_20.4..PC.18.1_18.3.	prepost	Post	0.341149	0.493907	45	45	0.495051	1
PC.16.0_20.5.	prepost	Post	-0.179739	0.197811	45	45	0.368606	1
PC.16.0_20.5..PC.16.1_20.4.	prepost	Post	0.0812926	0.0758108	45	45	0.289563	1
PC.16.0_20.5..PC.18.2_18.3.	prepost	Post	-0.244468	0.556238	45	45	0.663273	1
PC.16.0_22.4.	prepost	Post	-0.117782	0.246692	45	45	0.636479	1
PC.16.0_22.5..PC.18.0_20.5..PC.18.1_20.4.	prepost	Post	0.637332	0.523958	45	45	0.233185	1
PC.16.0_22.5..PC.18.1_20.4.	prepost	Post	-0.0235354	0.389681	45	45	0.952215	1
PC.16.0_22.6.	prepost	Post	-0.646745	0.482578	45	45	0.190092	1
PC.17.0_18.2.a	prepost	Post	0.680406	0.698411	45	45	0.338229	1
PC.17.0_18.2.b	prepost	Post	-0.161942	0.651096	45	45	0.805257	1
PC.17.0_22.6.	prepost	Post	-0.125939	0.132573	45	45	0.355459	1
PC.18.0_18.1.	prepost	Post	0.618912	0.352424	45	45	0.0891895	1
PC.18.0_18.2.	prepost	Post	1.05675	0.639482	45	45	0.109894	1
PC.18.0_20.3.	prepost	Post	0.762805	0.675112	45	45	0.267301	1
PC.18.0_20.4.	prepost	Post	0.160697	0.369716	45	45	0.666903	1
PC.18.0_20.4.a	prepost	Post	-0.120306	0.245338	45	45	0.627418	1
PC.18.0_20.4.b	prepost	Post	-0.266485	0.583352	45	45	0.650935	1
PC.18.0_22.4.	prepost	Post	-0.106947	0.147828	45	45	0.478007	1
PC.18.0_22.5.a	prepost	Post	-0.339496	0.57493	45	45	0.559439	1
PC.18.0_22.5.b	prepost	Post	0.19988	0.415728	45	45	0.634007	1
PC.18.0_22.6.	prepost	Post	-0.441407	0.36073	45	45	0.230756	1
PC.18.1.18.1.	prepost	Post	1.03466	0.459468	45	45	0.0314512	1
PC.18.1_18.2.	prepost	Post	1.32244	0.516345	45	45	0.0154272	1
PC.18.1_18.2..PC.18.0_18.3..PC.16.0_20.3.	prepost	Post	-0.288265	0.676511	45	45	0.672813	1
PC.18.1_20.3..PC.16.0_22.4.	prepost	Post	0.756471	0.465095	45	45	0.111153	1
PC.18.1_22.6.	prepost	Post	0.362721	0.537737	45	45	0.504652	1
PC.18.2.18.2.	prepost	Post	1.1788	0.672392	45	45	0.0867039	1
PC.18.2_18.3.	prepost	Post	0.803432	0.597871	45	45	0.188093	1
PC.18.2_20.4.	prepost	Post	0.349115	0.705946	45	45	0.624551	1
PC.28.0.	prepost	Post	-0.33227	0.201448	45	45	0.109709	1
PC.36.0.	prepost	Post	-0.352489	0.445201	45	45	0.434706	1
PC.37.4.	prepost	Post	0.122077	0.418816	45	45	0.772556	1
PC.37.5.a	prepost	Post	-0.198607	0.587639	45	45	0.737686	1
PC.38.1.	prepost	Post	1.27679	0.509723	45	45	0.0182088	1
PC.38.2.	prepost	Post	0.48168	0.432583	45	45	0.277164	1
PC.38.5.	prepost	Post	0.0257356	0.033194	45	45	0.443842	1
PC.38.7.a	prepost	Post	0.0246693	0.151792	45	45	0.871658	1
PC.40.6.	prepost	Post	-0.368833	0.679261	45	45	0.591404	1
PC.O.16.0.16.0.	prepost	Post	-0.547549	0.403412	45	45	0.184661	1
PC.O.16.0.20.3.	prepost	Post	0.4069	0.186746	45	45	0.0368227	1
PC.O.16.0.20.4..PC.P.18.0.18.3.	prepost	Post	0.155988	0.396403	45	45	0.696629	1
PC.O.16.0.20.5..PC.P.16.0.20.4.	prepost	Post	1.14219	0.532908	45	45	0.0396535	1
PC.O.16.0.22.5..PC.P.18.0.20.4.	prepost	Post	0.367033	0.307455	45	45	0.241542	1
PC.O.16.0.22.6.	prepost	Post	0.0744496	0.343591	45	45	0.829831	1
PC.O.18.0.16.0.	prepost	Post	-0.859015	0.540164	45	45	0.121902	1
PC.O.18.0.20.4.	prepost	Post	0.225653	0.209651	45	45	0.29008	1
PC.O.18.0.22.4.	prepost	Post	-0.52724	0.357301	45	45	0.147332	1
PC.O.18.0.22.5.	prepost	Post	-0.0842791	0.0615464	45	45	0.18521	1
PC.P.16.0.18.1.	prepost	Post	0.319269	0.317139	45	45	0.32187	1
PC.P.18.0.16.0.	prepost	Post	-0.813156	0.652117	45	45	0.221528	1
PC.P.18.0.20.4.	prepost	Post	0.0723734	0.180669	45	45	0.691395	1
PE.16.0.16.0.	prepost	Post	-0.43983	0.157662	45	45	0.00917335	1
PE.16.0_18.0.	prepost	Post	-0.85325	0.432339	45	45	0.0573524	1
PE.16.0_18.1.	prepost	Post	-0.657075	0.527265	45	45	0.221545	1
PE.16.0_18.1.a	prepost	Post	-0.131857	0.541905	45	45	0.809292	1
PE.16.0_18.2.	prepost	Post	0.182084	0.594236	45	45	0.761254	1
PE.16.0_18.3.	prepost	Post	1.38282	0.479357	45	45	0.00681137	1
PE.16.0_22.5..PE.18.1_20.4.a	prepost	Post	0.570823	0.223359	45	45	0.0156091	1
PE.16.0_22.5..PE.18.1_20.4.b	prepost	Post	0.0917202	0.11198	45	45	0.41726	1
PE.16.0_22.6.	prepost	Post	0.264681	0.187222	45	45	0.166982	1
PE.17.1_18.0.a	prepost	Post	-0.151613	0.548933	45	45	0.784212	1
PE.18.0_18.1.	prepost	Post	-0.482048	0.469871	45	45	0.312743	1
PE.18.0_18.2..PE.18.1.18.1.	prepost	Post	-0.164048	0.480732	45	45	0.735144	1
PE.18.0_20.4.	prepost	Post	0.34797	0.564193	45	45	0.541824	1
PE.18.1_18.2.	prepost	Post	0.689472	0.585577	45	45	0.24765	1
PE.18.1_18.2.a	prepost	Post	0.815051	0.584468	45	45	0.172796	1
PE.32.1.a	prepost	Post	-0.56864	0.569237	45	45	0.325234	1
PE.O.16.0.20.4.	prepost	Post	0.26939	0.320376	45	45	0.406555	1
PE.O.18.0.20.4.	prepost	Post	0.99653	0.564677	45	45	0.0869796	1
PE.P.16.0.18.1.	prepost	Post	1.35605	0.434704	45	45	0.0038241	1
PE.P.16.0.18.2.	prepost	Post	0.209366	0.457261	45	45	0.650155	1
PE.P.16.0.20.2.	prepost	Post	1.11204	0.497492	45	45	0.0325062	1
PE.P.16.0.20.3.	prepost	Post	0.362932	0.336038	45	45	0.288086	1
PE.P.16.0.20.4.	prepost	Post	0.779049	0.57743	45	45	0.186672	1
PE.P.16.0.22.4.	prepost	Post	1.54469	0.581406	45	45	0.0121689	1
PE.P.16.0.22.5.	prepost	Post	0.798614	0.415398	45	45	0.0633912	1
PE.P.16.0.22.6.	prepost	Post	0.272	0.365746	45	45	0.462456	1
PE.P.18.0.18.1.	prepost	Post	0.183153	0.613189	45	45	0.767117	1
PE.P.18.0.18.2.	prepost	Post	0.977113	0.549723	45	45	0.0851606	1
PE.P.18.0.20.3.	prepost	Post	0.50121	0.465875	45	45	0.290128	1
PE.P.18.0.20.4.	prepost	Post	1.03344	0.622787	45	45	0.106704	1
PE.P.18.0.20.5.	prepost	Post	1.42617	0.484619	45	45	0.00596663	1
PE.P.18.0.22.4.	prepost	Post	0.584628	0.239899	45	45	0.0205288	1
PE.P.18.0.22.5.	prepost	Post	0.634267	0.245108	45	45	0.0143944	1
PE.P.18.0.22.6.	prepost	Post	1.19741	0.854692	45	45	0.170805	1
PG.14.0_16.0.	prepost	Post	1.76125	0.761573	45	45	0.027673	1
PG.14.0_18.1..PG.16.0_16.1.	prepost	Post	-0.887238	0.412002	45	45	0.0389432	1
PG.15.0_18.1.	prepost	Post	0.399062	0.421956	45	45	0.351296	1
PG.15.0_18.3.	prepost	Post	0.222129	0.241644	45	45	0.364863	1
PG.16.0.16.0.	prepost	Post	0.370488	0.267304	45	45	0.175534	1
PG.16.0_17.1.	prepost	Post	1.40239	0.563065	45	45	0.0177452	1
PG.16.0_18.1.	prepost	Post	0.584222	0.260776	45	45	0.0320858	1
PG.16.0_20.3.a	prepost	Post	0.0305897	0.550776	45	45	0.956047	1
PG.16.1_17.1.	prepost	Post	-1.18116	0.440831	45	45	0.0104098	1
PG.16.1_18.1..PG.17.1.17.1.	prepost	Post	-1.71378	0.553998	45	45	0.00409275	1
PG.17.0_18.2..PG.17.1_18.1.	prepost	Post	-0.13287	0.429223	45	45	0.758919	1
PG.18.0_20.2..PG.18.2_20.0.	prepost	Post	-0.559864	0.685518	45	45	0.419838	1
PG.18.1_22.6..PG.18.3_22.4.	prepost	Post	0.00259636	0.130666	45	45	0.984239	1
PG.18.2_19.0.	prepost	Post	1.22139	0.472624	45	45	0.014353	1
PG.20.4.20.4.	prepost	Post	-0.456721	0.379846	45	45	0.238522	1
PG.34.1.	prepost	Post	0.597961	0.280763	45	45	0.0409691	1
PG.36.2.	prepost	Post	0.627544	0.25818	45	45	0.0209303	1
PG.36.6.	prepost	Post	-0.608881	0.360958	45	45	0.101207	1
PG.38.4.	prepost	Post	-0.567504	0.382506	45	45	0.148014	1
PG.41.6.	prepost	Post	0.234694	0.390514	45	45	0.552059	1
PG.46.6.	prepost	Post	0.377564	0.258648	45	45	0.154179	1
PI.14.0_18.0..PI.16.0.16.0.	prepost	Post	0.046868	0.536158	45	45	0.930894	1
PI.16.0_16.1.	prepost	Post	-0.114096	0.35945	45	45	0.752966	1
PI.16.0_18.1.	prepost	Post	0.233823	0.409576	45	45	0.572037	1
PI.16.0_18.2.	prepost	Post	0.00407326	0.663803	45	45	0.995142	1
PI.16.0_20.3.	prepost	Post	0.767037	0.799083	45	45	0.344135	1
PI.16.0_20.4.	prepost	Post	-0.489053	0.391152	45	45	0.220692	1
PI.16.0_22.3.	prepost	Post	-0.134968	0.537382	45	45	0.803386	1
PI.17.0_20.4.	prepost	Post	0.105799	0.190867	45	45	0.5833	1
PI.18.0_18.1.	prepost	Post	-0.214842	0.397063	45	45	0.592288	1
PI.18.0_18.2..PI.18.1.18.1.	prepost	Post	0.305228	0.534794	45	45	0.57232	1
PI.18.0_20.3.	prepost	Post	-0.855738	0.601642	45	45	0.165174	1
PI.18.0_22.4.	prepost	Post	-0.130413	0.386888	45	45	0.738423	1
PI.18.0_22.6.	prepost	Post	-0.37074	0.753033	45	45	0.626081	1
PI.18.1_18.2..PI.18.0_18.3.	prepost	Post	-0.142158	0.729121	45	45	0.846607	1
PI.18.1_20.3..PI.18.0_20.4.	prepost	Post	-0.501423	0.630008	45	45	0.432245	1
PI.18.1_20.4.	prepost	Post	0.413121	0.335915	45	45	0.227836	1
PS.16.1_22.1.	prepost	Post	-0.498295	0.235467	45	45	0.0401563	1
PS.18.0_20.0.	prepost	Post	-1.48697	0.533389	45	45	0.00897408	1
PS.18.0_22.3.	prepost	Post	0.4155	0.760113	45	45	0.588519	1
PS.38.1.	prepost	Post	-0.679214	0.66715	45	45	0.31628	1
SM.d16.1.16.0..SM.d18.1.14.0.	prepost	Post	-0.637925	0.43018	45	45	0.148183	1
SM.d16.1.24.1..SM.d18.1.22.1..SM.d18.2.22.0.	prepost	Post	-0.652994	0.355939	45	45	0.0763844	1
SM.d17.0.18.1.	prepost	Post	-1.58185	0.491706	45	45	0.00309974	1
SM.d17.1.16.0.	prepost	Post	-0.703701	0.477017	45	45	0.150175	1
SM.d17.1.24.0..SM.d18.1.23.0.	prepost	Post	-1.77499	0.548461	45	45	0.00287172	1
SM.d18.0.18.0.	prepost	Post	-1.17186	0.476273	45	45	0.0195595	1
SM.d18.0.18.1.	prepost	Post	-1.60428	0.547781	45	45	0.00645314	1
SM.d18.1.18.0.	prepost	Post	-0.675441	0.484218	45	45	0.172849	1
SM.d18.1.20.0.	prepost	Post	-1.00006	0.502014	45	45	0.0549664	1
SM.d18.1.22.0.	prepost	Post	-1.33258	0.465195	45	45	0.00743061	1
SM.d18.1.24.0.	prepost	Post	-1.6713	0.572398	45	45	0.00638309	1
SM.d18.1.24.1.	prepost	Post	-1.57899	0.580005	45	45	0.0105831	1
SM.d18.2.16.0.	prepost	Post	-1.16935	0.66373	45	45	0.0880995	1
SM.d18.2.18.0.	prepost	Post	-1.22115	0.550791	45	45	0.0339598	1
SM.d32.0.	prepost	Post	-0.379137	0.391271	45	45	0.339971	1
SM.d32.1.	prepost	Post	-0.352896	0.335493	45	45	0.300766	1
SM.d34.1.a	prepost	Post	-0.0926978	0.322267	45	45	0.775491	1
SM.d34.1.b	prepost	Post	-1.02143	0.451682	45	45	0.0316353	1
SM.d40.0.	prepost	Post	-1.19843	0.485372	45	45	0.019051	1
SM.d41.2.	prepost	Post	-0.385317	0.261578	45	45	0.150791	1
SM.d42.3.	prepost	Post	-1.28345	0.631557	45	45	0.0508589	1
SQDG.16.0_18.3.	prepost	Post	-0.103519	0.640129	45	45	0.872594	1
SQDG.18.0_18.2.	prepost	Post	-0.678735	0.51657	45	45	0.195838	1
SQDG.18.2_18.3.	prepost	Post	0.0742143	0.19588	45	45	0.707331	1
SQDG.18.3_18.3.	prepost	Post	0.621114	0.345586	45	45	0.082312	1
TG.12.0_12.0_18.1..TG.12.0_14.0_16.1..TG.12.0_14.1_16.0.	prepost	Post	-0.169206	0.587809	45	45	0.775299	1
TG.12.0_14.0_18.1..TG.12.0_16.0_16.1.	prepost	Post	-0.0259949	0.622643	45	45	0.966956	1
TG.12.0_14.0_18.2..TG.12.0_16.1_16.1.	prepost	Post	-1.2446	0.568007	45	45	0.035924	1
TG.12.0_16.0_18.1..TG.14.0_14.0_18.1..TG.14.0_16.0_16.1.	prepost	Post	-0.13607	0.831721	45	45	0.871072	1
TG.12.0_16.1_18.1..TG.14.0_14.0_18.2..TG.14.0_16.1_16.1.	prepost	Post	-1.00917	0.691975	45	45	0.154345	1
TG.14.0_14.0_16.0..TG.12.0_16.0_16.0.	prepost	Post	-0.163865	0.780601	45	45	0.835143	1
TG.14.0_16.0_16.0.	prepost	Post	0.84735	0.693051	45	45	0.230575	1
TG.14.0_16.0_17.0.	prepost	Post	-0.0107897	0.598082	45	45	0.985719	1
TG.14.0_16.0_17.1.	prepost	Post	-0.658311	0.578833	45	45	0.263869	1
TG.14.0_16.0_18.1..TG.16.0_16.0_16.1.	prepost	Post	0.0613806	0.743973	45	45	0.934765	1
TG.14.0_16.0_18.2..TG.14.0_16.1_18.1..TG.16.0_16.1_16.1.	prepost	Post	-0.913432	0.59677	45	45	0.136081	1
TG.14.0_16.1_18.2.	prepost	Post	-1.91744	0.731487	45	45	0.0133287	1
TG.14.0_18.1_18.1..TG.16.0_16.0_18.2.	prepost	Post	0.30348	0.2545	45	45	0.24136	1
TG.14.0_18.1_18.2..TG.16.1_16.1_18.1.	prepost	Post	-0.463504	0.457694	45	45	0.31894	1
TG.14.0_18.3_18.3.	prepost	Post	0.343361	0.441023	45	45	0.442075	1
TG.15.0_16.0_18.1..TG.15.0_17.0_17.1.	prepost	Post	-0.10852	0.40186	45	45	0.788862	1
TG.15.0_16.0_18.2..TG.15.0_16.1_18.1.	prepost	Post	-0.303309	0.411405	45	45	0.466413	1
TG.15.0_16.0_20.3..TG.16.0_17.1_18.2.	prepost	Post	-0.765776	0.551938	45	45	0.174944	1
TG.16.0_16.0_18.0.	prepost	Post	0.697402	0.422507	45	45	0.108661	1
TG.16.0_16.0_18.1.	prepost	Post	0.133041	0.295751	45	45	0.655879	1
TG.16.0_16.1_20.4..TG.16.0_18.2_18.3.	prepost	Post	0.100505	0.475423	45	45	0.833973	1
TG.16.0_17.0_18.1.	prepost	Post	-0.209396	0.420839	45	45	0.622226	1
TG.16.0_17.0_18.2..TG.16.0_17.1_18.1.	prepost	Post	-0.512949	0.437012	45	45	0.249232	1
TG.16.0_18.0_18.0.	prepost	Post	0.591809	0.46798	45	45	0.215439	1
TG.16.0_18.0_18.1.	prepost	Post	0.161162	0.239192	45	45	0.505402	1
TG.16.0_18.0_18.2..TG.16.0_18.1_18.1.	prepost	Post	0.210408	0.250443	45	45	0.407141	1
TG.16.0_18.0_19.1.	prepost	Post	0.0375335	0.506116	45	45	0.941383	1
TG.16.0_18.1_18.2.	prepost	Post	-0.0188991	0.243693	45	45	0.938684	1
TG.16.0_18.1_18.3..TG.16.0_18.2_18.2.	prepost	Post	-0.0754496	0.247457	45	45	0.76254	1
TG.16.0_18.1_20.4..TG.18.1_18.2_18.2.	prepost	Post	-0.185237	0.331039	45	45	0.579876	1
TG.16.0_18.2_19.0.	prepost	Post	-0.862206	0.474663	45	45	0.0790078	1
TG.16.0_18.3_22.4..TG.18.1_18.2_20.4.	prepost	Post	-0.319569	0.719138	45	45	0.659801	1
TG.16.0_20.2_22.4..TG.18.0_18.0_22.6.	prepost	Post	0.591494	0.723827	45	45	0.419596	1
TG.16.1_16.1_18.2.	prepost	Post	-0.866261	0.485394	45	45	0.0836986	1
TG.16.1_18.1_20.4..TG.18.2.18.2.18.2.	prepost	Post	-0.183839	0.336698	45	45	0.589095	1
TG.16.1_18.2_18.3.	prepost	Post	0.12397	0.824406	45	45	0.881416	1
TG.18.0.18.0.18.0.	prepost	Post	0.314915	0.509383	45	45	0.541023	1
TG.18.0_18.0_18.1.	prepost	Post	0.144299	0.307505	45	45	0.64232	1
TG.18.0_18.0_20.5..TG.18.0_18.1_20.4.	prepost	Post	1.00385	0.622979	45	45	0.114416	1
TG.18.0_18.1_18.1.	prepost	Post	-0.287368	0.347152	45	45	0.414146	1
TG.18.0_18.1_18.2..TG.18.1.18.1.18.1.	prepost	Post	-0.0384459	0.397499	45	45	0.923555	1
TG.18.0_18.1_20.1.	prepost	Post	-0.455982	0.400305	45	45	0.263629	1
TG.18.1_20.1_20.1.	prepost	Post	-0.591777	0.545214	45	45	0.286196	1
TG.18.1_20.4_20.4.	prepost	Post	0.0416517	0.337567	45	45	0.902569	1
TG.18.2_18.3_18.3.	prepost	Post	0.897354	0.987414	45	45	0.370368	1
TG.48.0.	prepost	Post	1.31452	0.551105	45	45	0.023191	1
TG.54.7.	prepost	Post	-0.206463	0.521852	45	45	0.695153	1
TG.58.2.	prepost	Post	-0.479589	0.494441	45	45	0.339827	1
